# Supplementary material for: Construction of SNP fingerprints and genetic diversity analysis of radish (Raphanus sativus L.)
Source: Frontiers journal article supplement (doi:10.3389/fpls.2024.1329890), 2024-02-02

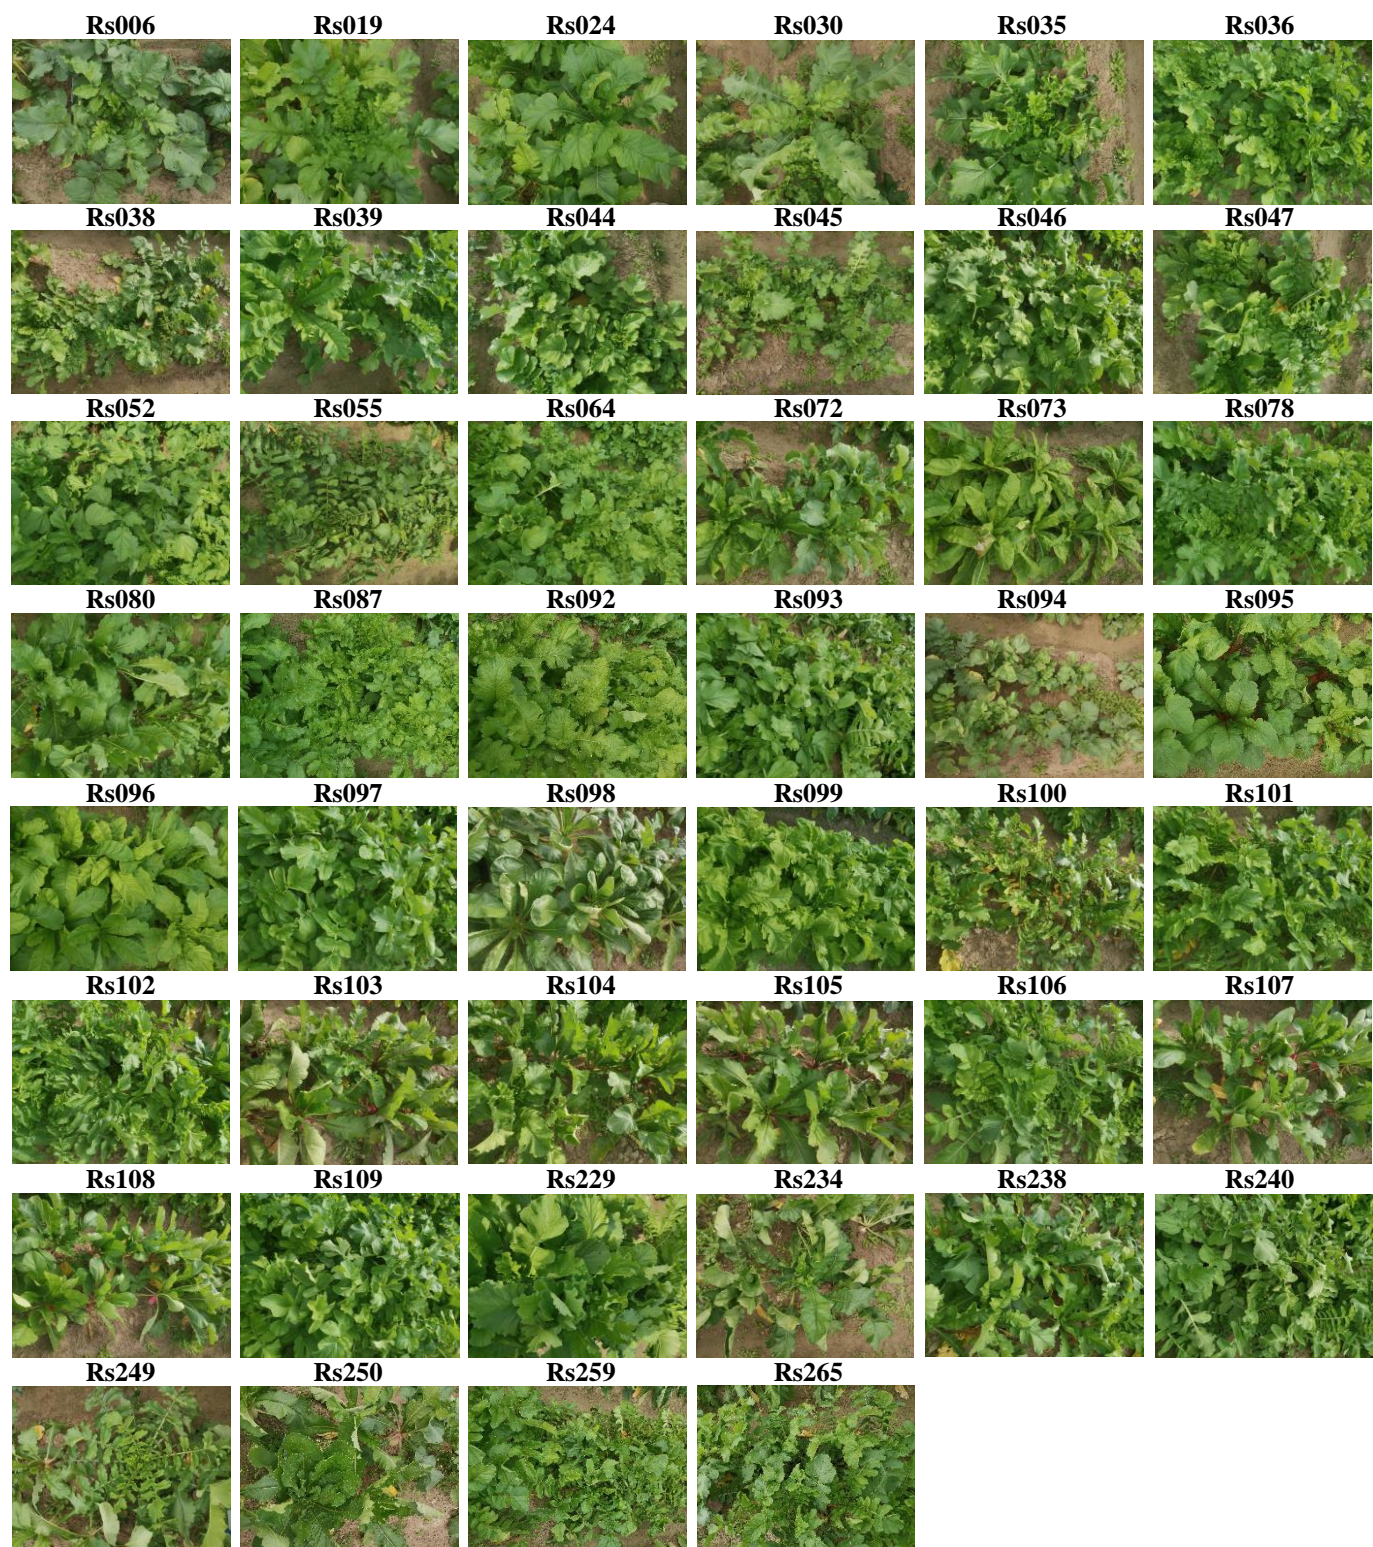

Supplement: Data_Sheet_1.PDF [file Data_Sheet_1.PDF]
