# Supplementary material for: Construction of SNP fingerprints and genetic diversity analysis of radish (Raphanus sativus L.)
Source: Front Plant Sci. 2024 Feb 2;15:1329890. doi: 10.3389/fpls.2024.1329890 (PMC10869463; doi:10.3389/fpls.2024.1329890)
Supplement: Supplementary Table 1 — Introduction and source of 356 radish varieties. [file Table_1.xlsx]

## Sheet: Sheet1
Supplementary Table S1. 356 Introduction and Source of 356 Radish Varieties
Code	Sample name	Scientific name	Source	Label
Rs001	An Qing Ban Ye	Raphanus sativus L.	Anqing City, Anhui Province	Local cultivars
Rs002	Chu Zhou Xiao Wu Ying	Raphanus sativus L.	Chuzhou City, Anhui Province	Local cultivars
Rs003	Fu Yang Er Zao	Raphanus sativus L.	Fuyang City, Anhui Province	Local cultivars
Rs004	Fu Yang Chen Si	Raphanus sativus L.	Fuyang City, Anhui Province	Local cultivars
Rs005	He Fei Kang Re Qing	Raphanus sativus L.	Hefei City, Anhui Province	Local cultivars
Rs006	Huai Yuan Chuan Xin Hong	Raphanus sativus L.	Huaiyuan County, Bengbu City, Anhui Province	Local cultivars
Rs007	Xiu Xian Da Hong	Raphanus sativus L.	Suzhou City, Anhui Province	Local cultivars
Rs008	Ya Jiang San Yue Qing	Raphanus sativus L.	Yajiang County, Ganzi Tibetan Autonomous Prefecture, Sichuan Province	Local cultivars
Rs009	Yan Yuan Dong	Raphanus sativus L.	Yanyuan County, Liangshan Yi Autonomous Prefecture, Sichuan Province	Local cultivars
Rs010	Yan Yuan Re	Raphanus sativus L.	Yanyuan County, Liangshan Yi Autonomous Prefecture, Sichuan Province	Local cultivars
Rs011	Yang Zhang Re	Raphanus sativus L.	China	Local cultivars
Rs012	Fu Qing Que Ye 60Tian	Raphanus sativus L.	Fuqing City, Fuzhou City, Fujian Province	Local cultivars
Rs013	Bai Qin	Raphanus sativus L.	China	Local cultivars
Rs014	Fu Zhou Gu Ling Xia	Raphanus sativus L.	Fuzhou City, Fujian Province	Local cultivars
Rs015	Fu Zhou Guan Zhou Quan Tou	Raphanus sativus L.	Fuzhou City, Fujian Province	Local cultivars
Rs016	Fu Zhou Yi Xia	Raphanus sativus L.	Fuzhou City, Fujian Province	Local cultivars
Rs017	Min Hou 60Tian	Raphanus sativus L.	Minhou County, Fuzhou City, Fujian Province	Local cultivars
Rs018	Sha Men 120Tian	Raphanus sativus L.	Xiamen City, Fujian Province	Local cultivars
Rs019	Wen Xian Dong	Raphanus sativus L.	Wen County, Longnan City, Gansu Province	Local cultivars
Rs020	Wei Wu Re Ba Diao	Raphanus sativus L.	China	Local cultivars
Rs021	Liu Ye Zao	Raphanus sativus L.	China	Local cultivars
Rs022	Ma Er Zao	Raphanus sativus L.	Guangzhou City, Guangdong Province	Local cultivars
Rs023	Lian Tou Zao	Raphanus sativus L.	China	Local cultivars
Rs024	Fan Yu Man Chou Tai	Raphanus sativus L.	Panyu District, Guangzhou City, Guangdong Province	Local cultivars
Rs025	Pa Chi	Raphanus sativus L.	Guangzhou City, Guangdong Province	Local cultivars
Rs026	Zai Tou	Raphanus sativus L.	China	Local cultivars
Rs027	Gui Yang Yan Zhi	Raphanus sativus L.	Guiyang City, Guizhou Province	Local cultivars
Rs028	Zhen Ning Bai	Raphanus sativus L.	Zhenning Buyi and Miao Autonomous County, Anshun City, Guizhou Province	Local cultivars
Rs029	Ding Zhou San Chi Bai	Raphanus sativus L.	Dingzhou City, Baoding City, Hebei Province	Local cultivars
Rs030	Gao Ba Bai Pi Zhang	Raphanus sativus L.	China	Local cultivars
Rs031	Shi Jia Zhuang Bai	Raphanus sativus L.	Shijiazhuang City, Hebei Province	Local cultivars
Rs032	Hua Xian Ma Ti Huang	Raphanus sativus L.	Hua County, Anyang City, Henan Province	Local cultivars
Rs033	Lin Ru Lu Tou Qing	Raphanus sativus L.	Linru Town, Ruzhou City, Pingdingshan City, Henan Province	Local cultivars
Rs034	Xiang Xian Niu Tui	Raphanus sativus L.	Xiangxian County, Xuchang City, Henan Province	Local cultivars
Rs035	791	Raphanus sativus L.	China	Local cultivars
Rs036	Yun Meng Liang Bai	Raphanus sativus L.	Yunmeng County, Xiaogan City, Hubei Province	Local cultivars
Rs037	Bai Cheng Bai Shui	Raphanus sativus L.	Baicheng City, Jilin Province	Local cultivars
Rs038	Wang Zhao Hong	Raphanus sativus L.	China	Local cultivars
Rs039	Nan Jing Sha Gao	Raphanus sativus L.	Nanjing City, Jiangsu Province	Local cultivars
Rs040	Ru Fu 60Zi	Raphanus sativus L.	Rufu, Jiangsu Province	Local cultivars
Rs041	Tai Zhou Chun Bai	Raphanus sativus L.	Taizhou City, Jiangsu Province	Local cultivars
Rs042	Yang Zhou Da Bai Pao Zi	Raphanus sativus L.	Yangzhou City, Jiangsu Province	Local cultivars
Rs043	Yi Xing Wan Bai	Raphanus sativus L.	Yixing City, Jiangsu Province	Local cultivars
Rs044	Da Lian Jin Liang Qing	Raphanus sativus L.	Dalian City, Liaoning Province	Local cultivars
Rs045	Shi Jia Zhuang Bai	Raphanus sativus L.	Shijiazhuang City, Hebei Province	Local cultivars
Rs046	Feng Cheng Luo Bo	Raphanus sativus L.	Fengcheng City, Yichun City, Jiangxi Province	Local cultivars
Rs047	Tu Zhou Luo Bo	Raphanus sativus L.	Tuzhou Village, Nanchang County, Nanchang City, Jiangxi Province	Local cultivars
Rs048	Xin Feng Luo Bo	Raphanus sativus L.	Xinfeng County, Ganzhou City, Jiangxi Province	Local cultivars
Rs049	Bao Tou Bai Shui	Raphanus sativus L.	Baotou City, Inner Mongolia Autonomous Region	Local cultivars
Rs050	Xiang Yang Bai	Raphanus sativus L.	Xiangyang District, Jiamusi City, Heilongjiang Province	Local cultivars
Rs051	Wu Lan Hao Te Bai Shui	Raphanus sativus L.	Ulanhot City, Xing'an League, Inner Mongolia Autonomous Region	Local cultivars
Rs052	Qing 2Hao	Raphanus sativus L.	China	Local cultivars
Rs053	Ji Nan Qing Yuan Cui	Raphanus sativus L.	Jinan City, Shandong Province	Local cultivars
Rs054	Ping Du Shui Luo Bo	Raphanus sativus L.	Pingdu City, Qingdao City, Shandong Province	Local cultivars
Rs055	Qu Fu Ma Ti Huang	Raphanus sativus L.	Qufu City, Jining City, Shandong Province	Local cultivars
Rs056	He Jin Niu Jiao Bai	Raphanus sativus L.	Hejin City, Yuncheng City, Shanxi Province	Local cultivars
Rs057	Tai Yuan Tong Shen Bai	Raphanus sativus L.	Taiyuan City, Shanxi Province	Local cultivars
Rs058	Xin Lü Tou	Raphanus sativus L.	China	Local cultivars
Rs059	Yang Quan Zhen Tou Bai	Raphanus sativus L.	Yangquan City, Shanxi Province	Local cultivars
Rs060	Zuo Yun Qing	Raphanus sativus L.	China	Local cultivars
Rs061	Cheng Tian Pi Pa Ye	Raphanus sativus L.	China	Local cultivars
Rs062	Guo Guang 1Hao	Raphanus sativus L.	Baoshan District, Shanghai	Local cultivars
Rs063	Bao Shan Ben Di 40Tian	Raphanus sativus L.	Yuepu, Baoshan District, Shanghai	Local cultivars
Rs064	Yue Pu Wan Zhang Bai	Raphanus sativus L.	China	Local cultivars
Rs065	Yong Sheng Bai Luo Bo	Raphanus sativus L.	Yongsheng County, Lijiang City, Yunnan Province	Local cultivars
Rs066	Hang Zhou Xiao Bai	Raphanus sativus L.	Hangzhou City, Zhejiang Province	Local cultivars
Rs067	Lan Xi Huang Pen	Raphanus sativus L.	Lanxi City, Jinhua City, Zhejiang Province	Local cultivars
Rs068	Xian Ju Luo Bo	Raphanus sativus L.	Xianju County, Taizhou City, Zhejiang Province	Local cultivars
Rs069	Feng Dou Xue Bai Luo Bo	Raphanus sativus L.	Fengdu County, Chongqing City	Local cultivars
Rs070	Wan Yuan Si Ji Bo	Raphanus sativus L.	Wanyuan City, Dazhou City, Sichuan Province	Local cultivars
Rs071	Yi Bin Pi Pa Ye	Raphanus sativus L.	Yibin City, Sichuan Province	Local cultivars
Rs072	Lang Zhong Chun Luo Bo	Raphanus sativus L.	Langzhong City, Nanchong City, Sichuan Province	Local cultivars
Rs073	Lu Zhou 60Zao	Raphanus sativus L.	Luzhou City, Sichuan Province	Local cultivars
Rs074	Lu Jiang Zao Luo Bo	Raphanus sativus L.	Lujiang County, Hefei City, Anhui Province	Local cultivars
Rs075	Hui Li San Yue Luo Bo	Raphanus sativus L.	Huili County, Liangshan Yi Autonomous Prefecture, Sichuan Province	Local cultivars
Rs076	Tai Wan 100Tian	Raphanus sativus L.	Taiwan Province	Local cultivars
Rs077	Zhang Le Zao Luo Bo	Raphanus sativus L.	Changle District, Fuzhou City, Fujian Province	Local cultivars
Rs078	Fu Zao Luo Bo	Raphanus sativus L.	China	Local cultivars
Rs079	Ri Ben Ma Zhuang	Raphanus sativus L.	Japan	Local cultivars
Rs080	Wu Han Huo Che Tou	Raphanus sativus L.	Wuhan City, Hubei Province	Local cultivars
Rs081	Cheng Jiao Zao Bai Luo Bo	Raphanus sativus L.	China	Local cultivars
Rs082	Ding Bian Er Chong Zi	Raphanus sativus L.	Dingbian County, Yulin City, Shaanxi Province	Local cultivars
Rs083	Wu Ning Shui Luo Bo	Raphanus sativus L.	China	Local cultivars
Rs084	Owol Wol	Raphanus sativus L.	Unknown	Local cultivars
Rs085	Ke Rui Ke	Raphanus sativus L.	Unknown	Local cultivars
Rs086	Hua Ye Da Bai Luo Bo	Raphanus sativus L.	China	Local cultivars
Rs087	Shi Da Gen	Raphanus sativus L.	China	Local cultivars
Rs088	Jin Hua Zao Luo Bo	Raphanus sativus L.	Jinhua City, Zhejiang Province	Local cultivars
Rs089	Lan Xi Xiao Luo Bo	Raphanus sativus L.	Lanxi City, Jinhua City, Zhejiang Province	Local cultivars
Rs090	Zhang Gang Shan Xiao Luo Bo	Raphanus sativus L.	Changgangshan, Tiantai County, Taizhou City, Zhejiang Province	Local cultivars
Rs091	Xiao Cai Luo Bo	Raphanus sativus L.	Japan	Local cultivars
Rs092	Xin Yuan Da Cr-1	Raphanus sativus L.	China	Local cultivars
Rs093	Zao Hua Luo Bo	Raphanus sativus L.	Zhejiang Province, China	Local cultivars
Rs094	Hong Ding Luo Bo	Raphanus sativus L.	Beijing, China	Local cultivars
Rs095	Xin Wu Man Shen Hong	Raphanus sativus L.	Chengdu New Agriculture Wuhou Seed and Seedling Research Institute	Commercial
Rs096	Xin Wu Liu Shi Zao	Raphanus sativus L.	Chengdu New Agriculture Wuhou Seed and Seedling Research Institute	Commercial
Rs097	Xing Yan Jiu Jin Wang	Raphanus sativus L.	Guangdong Xingning Mingxing Seed Co., Ltd	Commercial
Rs098	Shui Jiang Duan Ye Shi San Hao Zao	Raphanus sativus L.	Guangzhou Shuijiang Seed Industry Co., Ltd	Commercial
Rs099	Xing Ke Feng Tang Guan	Raphanus sativus L.	Hangzhou Kefeng Seed Co., Ltd	Commercial
Rs100	Xing Ke Feng Xi Tou Jing Yuan Hong	Raphanus sativus L.	Hangzhou Kefeng Seed Co., Ltd	Commercial
Rs101	Xing Ke Feng Xi Tou Jing Yuan Bai	Raphanus sativus L.	Hangzhou Kefeng Seed Co., Ltd	Commercial
Rs102	Xing Ke Feng Yuan Bai	Raphanus sativus L.	Hangzhou Kefeng Seed Co., Ltd	Commercial
Rs103	Xing Ke Feng Ban Tou Hong	Raphanus sativus L.	Hangzhou Kefeng Seed Co., Ltd	Commercial
Rs104	Liang Feng Fen Hong Yi Dian Hong	Raphanus sativus L.	Hangzhou Liangfeng Vegetable Seed Co., Ltd	Commercial
Rs105	Liang Feng Yi Dian Hong	Raphanus sativus L.	Hangzhou Liangfeng Vegetable Seed Co., Ltd	Commercial
Rs106	Lü Feng Gou Bai Luo Bo	Raphanus sativus L.	Hangzhou Lvfeng Seed Co., Ltd	Commercial
Rs107	Lü Feng Da Yi Dian Hong	Raphanus sativus L.	Hangzhou Lvfeng Seed Co., Ltd	Commercial
Rs108	Lü Feng Yi Dian Hong	Raphanus sativus L.	Hangzhou Lvfeng Seed Co., Ltd	Commercial
Rs109	Lü Feng Zhe Da Zhang	Raphanus sativus L.	Hangzhou Lvfeng Seed Co., Ltd	Commercial
Rs110	Lü Feng Jiu Jin Wang	Raphanus sativus L.	Hangzhou Lvfeng Seed Co., Ltd	Commercial
Rs111	San Jiang Jiu Jin Bang Wan	Raphanus sativus L.	Hangzhou Sanjiang Seed Industry Co., Ltd	Commercial
Rs112	San Jiang Nan Pan Zhou	Raphanus sativus L.	Hangzhou Sanjiang Seed Industry Co., Ltd	Commercial
Rs113	Shen He Feng Tian 65	Raphanus sativus L.	Hebei Shenhe Seed Industry Co., Ltd	Commercial
Rs114	Shen He Shui Guo Qing	Raphanus sativus L.	Hebei Shenhe Seed Industry Co., Ltd	Commercial
Rs115	Shen He Man Tang Hong	Raphanus sativus L.	Hebei Shenhe Seed Industry Co., Ltd	Commercial
Rs116	You Xian Tai Hu Luo Bo	Raphanus sativus L.	Jiaxing Xianfeng Seed Industry Co., Ltd	Commercial
Rs117	You Xian Shui Jing Luo Bo	Raphanus sativus L.	Jiaxing Xianfeng Seed Industry Co., Ltd	Commercial
Rs118	Yang Yan Cui Xue Luo Bo	Raphanus sativus L.	Yangzhou Yangyan Seed Industry Technology Co., Ltd., Jiangsu Province	Commercial
Rs119	Yang Yan Xue Li Bai Luo Bo	Raphanus sativus L.	Yangzhou Yangyan Seed Industry Technology Co., Ltd., Jiangsu Province	Commercial
Rs120	Hua Gan Jiu Jin Yu Chi	Raphanus sativus L.	Honorary Product of Jiangxi Huanong Seed Industry Co., Ltd	Commercial
Rs121	Hua Gan Duan Ye Shi San	Raphanus sativus L.	Honorary Product of Jiangxi Huanong Seed Industry Co., Ltd	Commercial
Rs122	Gan Xin 308Duan Ye Shi San	Raphanus sativus L.	Jiangxi Ganxin Seed Co., Ltd	Commercial
Rs123	Yi Feng He Hei Ye Chun Bu Lao	Raphanus sativus L.	Yifenghe Seed Service Department, Fucheng District, Mianyang City	Commercial
Rs124	Yi Feng He Zhang Bai Yu	Raphanus sativus L.	Yifenghe Seed Service Department, Fucheng District, Mianyang City	Commercial
Rs125	Mei Hao Jia Yuan Si Ji Yan Zhi Hong	Raphanus sativus L.	Mianyang Huaxia Modern Seed Industry Co., Ltd	Commercial
Rs126	Ou Bao Li Si Ji Man Shen Hong	Raphanus sativus L.	Mianyang Huaxia Modern Seed Industry Co., Ltd	Commercial
Rs127	Ou Bao Li Chun Bu Lao	Raphanus sativus L.	Mianyang Huaxia Modern Seed Industry Co., Ltd	Commercial
Rs128	Idealyang Zhou Yuan Bai	Raphanus sativus L.	Nanjing Ideal Agricultural Technology Co., Ltd	Commercial
Rs129	Lü Ling Yang Hua	Raphanus sativus L.	Nanjing Green Collar Seed Industry Co., Ltd	Commercial
Rs130	Lü Ling Duan Ye 13	Raphanus sativus L.	Nanjing Green Collar Seed Industry Co., Ltd	Commercial
Rs131	Lü Ling Yuan Bai	Raphanus sativus L.	Nanjing Green Collar Seed Industry Co., Ltd	Commercial
Rs132	Gan Ke Jiu Jin	Raphanus sativus L.	Shangrao Ganfeng Seed Co., Ltd	Commercial
Rs133	Mai De Hao Chun Bu Lao	Raphanus sativus L.	Sichuan Maidehao Agricultural Technology Co., Ltd	Commercial
Rs134	Chuan Di Te Tang Guan Luo Bo	Raphanus sativus L.	Sichuan Chuandite Agricultural Technology Co., Ltd	Commercial
Rs135	Chuan Di Te Hong Pao Tian Cui	Raphanus sativus L.	Sichuan Chuandite Agricultural Technology Co., Ltd	Commercial
Rs136	Chuan Di Te Tang Guan 2Hao	Raphanus sativus L.	Sichuan Chuandite Agricultural Technology Co., Ltd	Commercial
Rs137	Ke Xing Jiu Jin Bang Bai Cui Wan	Raphanus sativus L.	Sichuan Mianyang Kexing Seed Industry Co., Ltd	Commercial
Rs138	Nan Feng Hong Xin Cui	Raphanus sativus L.	Nanfeng Vegetable Research Institute, Mianyang City, Sichuan Province	Commercial
Rs139	Nan Feng Da Qing	Raphanus sativus L.	Nanfeng Vegetable Research Institute, Mianyang City, Sichuan Province	Commercial
Rs140	Nan Feng Qing Tou Sha Guan	Raphanus sativus L.	Nanfeng Vegetable Research Institute, Mianyang City, Sichuan Province	Commercial
Rs141	Zhong Dou Jin Tiao Hong	Raphanus sativus L.	Sichuan Zhongdu Gaoke Seed Industry Co., Ltd	Commercial
Rs142	Zhong Dou Nan Pan Zhou	Raphanus sativus L.	Sichuan Zhongdu Gaoke Seed Industry Co., Ltd	Commercial
Rs143	Zhong Dou Chun Bu Lao	Raphanus sativus L.	Sichuan Zhongdu Gaoke Seed Industry Co., Ltd	Commercial
Rs144	Hong Da Qi Ye Hong	Raphanus sativus L.	Wuhan Hongda Seedlings Co., Ltd	Commercial
Rs145	Xia Nong Xi Zi Yi Dian Hong	Raphanus sativus L.	Xianong (Xiamen) Agricultural Technology Co., Ltd	Commercial
Rs146	San Cheng Gao Shan Zao	Raphanus sativus L.	Zhejiang Sancheng Seed Industry Co., Ltd	Commercial
Rs147	Jia Yi Feng Yuan Hong	Raphanus sativus L.	Jiaxing Jiafeng Seed Co., Ltd., Zhejiang Province	Commercial
Rs148	Jia Yi Feng Zhang Hong	Raphanus sativus L.	Jiaxing Jiafeng Seed Co., Ltd., Zhejiang Province	Commercial
Rs149	Xin Long Hua Ying Chun	Raphanus sativus L.	Chongqing Longhua Seed Industry Co., Ltd	Commercial
Rs150	Yun Feng Han Guo Wan Chun	Raphanus sativus L.	Yunfeng Seedlings Co., Ltd. in Yongchuan District, Chongqing	Commercial
Rs151	San Chuan Tang Guan	Raphanus sativus L.	Chongqing Fangzheng Agriculture Co., Ltd	Commercial
Rs152	Hang Cheng Si Ji Man Shen Hong	Raphanus sativus L.	Jiangxi Hangcheng Seed Industry	Commercial
Rs153	Feng Le He Fei Qing	Raphanus sativus L.	Hefei Fengle Seed Industry Co., Ltd	Commercial
Rs154	Chang Feng Gao Tang Cui Shui Guo	Raphanus sativus L.	Qingxian Aisen Vegetable Variety Promotion Center	Commercial
Rs155	He Feng Cui Qing Sha Wo	Raphanus sativus L.	Hefei Hefeng Seed Industry Co., Ltd	Commercial
Rs156	Hua Liang Xin Li Mei	Raphanus sativus L.	Shandong Hualiang Seed Industry Co., Ltd	Commercial F1
Rs157	Shi Cheng Duan Ye 13-6Tian Cui Zao	Raphanus sativus L.	Shicheng Seed Co., Ltd	Commercial
Rs158	Chuan He Lü Luo Qing Tou	Raphanus sativus L.	Wuhan Chuanhe Agricultural Technology Co., Ltd	Commercial
Rs159	Guang Dong Ma Er Zao	Raphanus sativus L.	Yong'an Yanfeng Seed Industry Co., Ltd	Commercial
Rs160	Jin Sha Duan Ye 13Hao Zao	Raphanus sativus L.	Shantou Chenghai District Jinsha Vegetable Research Institute	Commercial
Rs161	Liang Da Bei Jing Man Tang Hong	Raphanus sativus L.	Qingxian Liangdasheng Agricultural Technology Promotion Center	Commercial
Rs162	Feng Le Xue Hua Bai	Raphanus sativus L.	Hefei Fengle Seed Industry Co., Ltd	Commercial
Rs163	Hai Run Si Ji Qing Shui Guo Luo Bo	Raphanus sativus L.	Zhumadian Hairun Agricultural Technology Co., Ltd	Commercial
Rs164	Feng Le Lu Tou Qing	Raphanus sativus L.	Hefei Fengle Seed Industry Co., Ltd	Commercial
Rs165	Gan Xin Duan Ye Shi San Hao	Raphanus sativus L.	Jiangxi Ganxin Seed Co., Ltd	Commercial
Rs166	Qi Ye Hong Feng Luo Bo	Raphanus sativus L.	Wuhan Xingyuan Seedling Firm	Commercial
Rs167	Ke Long Cui Tian Wei Da Qing	Raphanus sativus L.	Henan Kelong Seed Industry Co., Ltd	Commercial
Rs168	Yan Feng 791	Raphanus sativus L.	Yong'an Yanfeng Seed Industry Co., Ltd	Commercial
Rs169	He Feng Cui Tian Wei Lu Tou Qing	Raphanus sativus L.	Hefei Hefeng Seed Industry Co., Ltd	Commercial
Rs170	He Feng Da Qing Luo Bo Wang	Raphanus sativus L.	Hefei Hefeng Seed Industry Co., Ltd	Commercial
Rs171	Wan Feng Hong Hua Yu Cui Hua Ying	Raphanus sativus L.	Beijing Wanfeng Agricultural Research Technology Co., Ltd	Commercial
Rs172	He Feng Shuang You Hong	Raphanus sativus L.	Hefei Hefeng Seed Industry Co., Ltd	Commercial
Rs173	Mei Ling Yang Zhou Yuan Bai	Raphanus sativus L.	Yangzhou Vegetable Seed Co., Ltd	Commercial
Rs174	He Feng Zhe Da Zhang	Raphanus sativus L.	Hefei Hefeng Seed Industry Co., Ltd	Commercial
Rs175	Jin Sheng Da Yang Hua	Raphanus sativus L.	Nanjing Jinshengda Seed Co., Ltd	Commercial
Rs176	Ning Wei Nan Pan Zhou Chi	Raphanus sativus L.	Guangxi Guilin High tech Zone Tianyu Seed Co., Ltd	Commercial
Rs177	Han Yu Shui Guo	Raphanus sativus L.	Qingxian Chunfeng Vegetable Breeding Farm	Commercial
Rs178	Jin Liang Sha Wo Shui Guo	Raphanus sativus L.	Tianjin Jinong Seed Co., Ltd	Commercial
Rs179	Si Chao Qiao Tou Qing	Raphanus sativus L.	Shenyang Fengnong Agriculture Co., Ltd	Commercial
Rs180	Ji Hong Da Lian 501	Raphanus sativus L.	Iridis Seed (Dalian) Co., Ltd	Commercial
Rs181	Kai Tuo Zhe Ying Tao	Raphanus sativus L.	Gansu Ganyinong Seed Industry Co., Ltd	Commercial
Rs182	Fang Zhen Da Hong Pao	Raphanus sativus L.	Henan Fangzhen Seed Co., Ltd	Commercial
Rs183	Fang Zhen Jiu Jin Wang	Raphanus sativus L.	Henan Fangzhen Seed Co., Ltd	Commercial
Rs184	Yong Hong Tian Cui Bai Yu	Raphanus sativus L.	Botou Yonghong Seed Co., Ltd	Commercial
Rs185	Yong Hong Xiao Wu Ying Hong Shui	Raphanus sativus L.	Botou Yonghong Seed Co., Ltd	Commercial
Rs186	Yong Hong Man Tang Hong	Raphanus sativus L.	Botou Yonghong Seed Co., Ltd	Commercial
Rs187	Hua Yu San Chi Bai	Raphanus sativus L.	Qingxian Xingyun Seed Industry Co., Ltd	Commercial
Rs188	He Shuo Wei Xian Qing	Raphanus sativus L.	Cangzhou Heshuo Agricultural Technology Co., Ltd	Commercial
Rs189	Tian Yang Da Hong Pao	Raphanus sativus L.	Shenyang Bosite Agricultural Technology Co., Ltd	Commercial
Rs190	Hua Yu Man Tang Hong	Raphanus sativus L.	Qingxian Xingyun Vegetable Seed Breeding Center	Commercial
Rs191	Hua Yu Tian Cui Sha Wo	Raphanus sativus L.	Qingxian Xingyun Seed Industry Co., Ltd	Commercial
Rs192	Tian Yang 791	Raphanus sativus L.	Shenyang Bosite Agricultural Technology Co., Ltd	Commercial
Rs193	Yi Feng He Hong Xin Hong Pi	Raphanus sativus L.	Yifenghe Seed Service Department, Fucheng District, Mianyang City	Commercial
Rs194	Hua Yu Ying Tao	Raphanus sativus L.	Qingxian Xingyun Seed Co., Ltd	Commercial
Rs195	Hua Yu Tian Cui Shui （501）	Raphanus sativus L.	Qingxian Xingyun Seed Co., Ltd	Commercial
Rs196	Yun Feng Cheng Dou Hong Xin	Raphanus sativus L.	Yunfeng Seedlings Co., Ltd. in Yongchuan District, Chongqing	Commercial
Rs197	Sheng Kai Hong Hua Yu Cui	Raphanus sativus L.	Beijing Shengkai Huanong Technology Co., Ltd	Commercial
Rs198	Qi Xin Bai Yu	Raphanus sativus L.	Qingxian Qianrui Agricultural Technology Promotion Center	Commercial
Rs199	Yong Hong Tian Cui Shui Guo	Raphanus sativus L.	Yonghong Seed Co., Ltd. in Botou City, Hebei Province	Commercial
Rs200	Han Yu Chao Bai Yu	Raphanus sativus L.	Qingxian Chunfeng Vegetable Breeding Farm	Commercial
Rs201	Chang Feng Bei Jing Da Hong Feng	Raphanus sativus L.	Qingxian Aisen Vegetable Variety Promotion Center	Commercial
Rs202	Xin Wen Shui Guo Wei Man Tang Hong	Raphanus sativus L.	Henan Dazheng Runhe Seed Industry Co., Ltd	Commercial
Rs203	Cang Long Feng Tian Cui Bai Yu	Raphanus sativus L.	Cangzhou Longfeng Seed Sales Co., Ltd	Commercial
Rs204	Yong Hong 791	Raphanus sativus L.	Yonghong Seed Co., Ltd. in Botou City, Hebei Province	Commercial
Rs205	Dong Sheng Shou Zhi	Raphanus sativus L.	Beijing Dongsheng Seed Industry Co., Ltd	Commercial
Rs206	Sheng Yu Shen Yang Jiu Jin Hong	Raphanus sativus L.	Jilin Shengyu Seed Industry Co., Ltd	Commercial
Rs207	Chun Feng Yang Zhou Yuan Bai	Raphanus sativus L.	Qingxian Chunfeng Vegetable Breeding Farm	Commercial
Rs208	Hua Yu Man Shen Hong	Raphanus sativus L.	Qingxian Xingyun Seed Industry Co., Ltd	Commercial
Rs209	Wang Hui Fen Pi Cui	Raphanus sativus L.	Jilin Fuyu Yinong Seed Industry Co., Ltd	Commercial
Rs210	Chen Shu Han Jing Xue	Raphanus sativus L.	Chongqing Huayu Seed Co., Ltd	Commercial
Rs211	Yong Hong Hua Ying Luo Bo	Raphanus sativus L.	Yonghong Seed Co., Ltd. in Botou City, Hebei Province	Commercial
Rs212	Qian Rui Tian Jin Sha Wo	Raphanus sativus L.	Qingxian Qianrui Agricultural Technology Co., Ltd	Commercial
Rs213	Chun Feng Bei Jing Man Tang Hong	Raphanus sativus L.	Qingxian Chunfeng Seed Industry Co., Ltd	Commercial
Rs214	Qian Rui Tian Cui Da Qing	Raphanus sativus L.	Qingxian Qianrui Agricultural Technology Promotion Center	Commercial
Rs215	Lü Zhong Wang San Chi Bai	Raphanus sativus L.	Shenyang Greenhouse Vegetable Seed Sales Co., Ltd	Commercial
Rs216	Chun Feng Hong Ding Ying Tao	Raphanus sativus L.	Qingxian Chunfeng Seed Industry Co., Ltd	Commercial
Rs217	Qian Rui Xiao Wu Ying Shui	Raphanus sativus L.	Qingxian Qianrui Agricultural Technology Co., Ltd	Commercial
Rs218	Shi Cheng Duan Ye Shi San Hao Zao	Raphanus sativus L.	Shicheng Seed Co., Ltd	Commercial
Rs219	Gui Lin Guan Yang Xue Luo Bo	Raphanus sativus L.	Guanyang County, Guilin City	Commercial
Rs220	Chun Bu Lao	Raphanus sativus L.	China	Commercial
Rs221	Xin Xi Wang Nan Pan Zhou Wan	Raphanus sativus L.	Guilin New Hope Seed Co., Ltd	Commercial
Rs222	Jun Chuan Duan Ye 13	Raphanus sativus L.	Beijing Junchuan Seed Industry Technology Co., Ltd	Commercial
Rs223	Le Ye Fen Se Pi Yao Shan	Raphanus sativus L.	Jinxiu Yao Autonomous County, Guangxi Zhuang Autonomous Region, China	Commercial
Rs224	Le Ye Zi Hong Pi Yao Shan	Raphanus sativus L.	Jinxiu Yao Autonomous County, Guangxi Zhuang Autonomous Region, China	Commercial
Rs225	Gui Lin Guan Yang Xue	Raphanus sativus L.	Guangxi Academy of Agricultural Sciences	Commercial
Rs226	Gan Nong Yuan Bai	Raphanus sativus L.	Jiangxi Gannong Seed Industry Co., Ltd	Commercial
Rs227	Gan Nong Duan Ye Shi San Hao Zao	Raphanus sativus L.	Jiangxi Gannong Seed Industry Co., Ltd	Commercial
Rs228	Gan Nong Jiu Jin Nan Pan Zhou Zao	Raphanus sativus L.	Jiangxi Gannong Seed Industry Co., Ltd	Commercial
Rs229	Tu Luo Bo	Raphanus sativus L.	Vegetable Institute of Zhejiang Academy of Agricultural Sciences	Cultivars
Rs230	Jian De 034	Raphanus sativus L.	Vegetable Institute of Zhejiang Academy of Agricultural Sciences	Cultivars
Rs231	Shui Che Luo Bo	Raphanus sativus L.	Vegetable Institute of Zhejiang Academy of Agricultural Sciences	Cultivars
Rs232	Luo Bo	Raphanus sativus L.	Vegetable Institute of Zhejiang Academy of Agricultural Sciences	Cultivars
Rs233	Yuan Bai Luo Bo	Raphanus sativus L.	Vegetable Institute of Zhejiang Academy of Agricultural Sciences	Cultivars
Rs234	Shui Jing Luo Bo	Raphanus sativus L.	Vegetable Institute of Zhejiang Academy of Agricultural Sciences	Cultivars
Rs235	Bai Luo Bo	Raphanus sativus L.	Vegetable Institute of Zhejiang Academy of Agricultural Sciences	Cultivars
Rs236	Luo Bo	Raphanus sativus L.	Vegetable Institute of Zhejiang Academy of Agricultural Sciences	Cultivars
Rs237	Luo Bo	Raphanus sativus L.	Vegetable Institute of Zhejiang Academy of Agricultural Sciences	Cultivars
Rs238	Yin Keng Luo Bo	Raphanus sativus L.	Vegetable Institute of Zhejiang Academy of Agricultural Sciences	Cultivars
Rs239	Bai Luo Bo	Raphanus sativus L.	Vegetable Institute of Zhejiang Academy of Agricultural Sciences	Cultivars
Rs240	Sha Bu Cai Tou	Raphanus sativus L.	Vegetable Institute of Zhejiang Academy of Agricultural Sciences	Cultivars
Rs241	Yi Dian Hong	Raphanus sativus L.	Vegetable Institute of Zhejiang Academy of Agricultural Sciences	Cultivars
Rs242	Bai Luo Bo （Duan Zhong ）	Raphanus sativus L.	Vegetable Institute of Zhejiang Academy of Agricultural Sciences	Cultivars
Rs243	Ban Jie Hong Luo Bo	Raphanus sativus L.	Vegetable Institute of Zhejiang Academy of Agricultural Sciences	Cultivars
Rs244	Shan Luo Bo	Raphanus sativus L.	Vegetable Institute of Zhejiang Academy of Agricultural Sciences	Cultivars
Rs245	Shan Luo Bo	Raphanus sativus L.	Vegetable Institute of Zhejiang Academy of Agricultural Sciences	Cultivars
Rs246	Da Luo Bo	Raphanus sativus L.	Vegetable Institute of Zhejiang Academy of Agricultural Sciences	Cultivars
Rs247	Xiao Luo Bo	Raphanus sativus L.	Vegetable Institute of Zhejiang Academy of Agricultural Sciences	Cultivars
Rs248	Zhang Gang Shan Luo Bo	Raphanus sativus L.	Vegetable Institute of Zhejiang Academy of Agricultural Sciences	Cultivars
Rs249	Xue Li Luo Bo	Raphanus sativus L.	Vegetable Institute of Zhejiang Academy of Agricultural Sciences	Cultivars
Rs250	Fen Hong Yi Dian Hong	Raphanus sativus L.	Vegetable Institute of Zhejiang Academy of Agricultural Sciences	Cultivars
Rs251	Yuan Luo Bo	Raphanus sativus L.	Vegetable Institute of Zhejiang Academy of Agricultural Sciences	Cultivars
Rs252	Xiao Jin Zhong Luo Bo	Raphanus sativus L.	Vegetable Institute of Zhejiang Academy of Agricultural Sciences	Cultivars
Rs253	Tai Hu Luo Bo	Raphanus sativus L.	Vegetable Institute of Zhejiang Academy of Agricultural Sciences	Cultivars
Rs254	Kan Xia Luo Bo	Raphanus sativus L.	Vegetable Institute of Zhejiang Academy of Agricultural Sciences	Cultivars
Rs255	Ben Di Bai Luo Bo	Raphanus sativus L.	Vegetable Institute of Zhejiang Academy of Agricultural Sciences	Cultivars
Rs256	Yi Dian Hong Luo Bo	Raphanus sativus L.	Vegetable Institute of Zhejiang Academy of Agricultural Sciences	Cultivars
Rs257	Ban Ye Yi Dian Hong	Raphanus sativus L.	Vegetable Institute of Zhejiang Academy of Agricultural Sciences	Cultivars
Rs258	Hua Ye Yi Dian Hong	Raphanus sativus L.	Vegetable Institute of Zhejiang Academy of Agricultural Sciences	Cultivars
Rs259	Xi Jing Di Xia Yuan Hong	Raphanus sativus L.	Vegetable Institute of Zhejiang Academy of Agricultural Sciences	Cultivars
Rs260	Lan Xi Xiao Luo Bo	Raphanus sativus L.	Vegetable Institute of Zhejiang Academy of Agricultural Sciences	Cultivars
Rs261	Hu Ping Di Luo Bo	Raphanus sativus L.	Vegetable Institute of Zhejiang Academy of Agricultural Sciences	Cultivars
Rs262	Yong Kang Luo Bo	Raphanus sativus L.	Vegetable Institute of Zhejiang Academy of Agricultural Sciences	Cultivars
Rs263	Luo Bo	Raphanus sativus L.	Vegetable Institute of Zhejiang Academy of Agricultural Sciences	Cultivars
Rs264	Si Que Luo Bo	Raphanus sativus L.	Vegetable Institute of Zhejiang Academy of Agricultural Sciences	Cultivars
Rs265	Si Que Luo Bo	Raphanus sativus L.	Vegetable Institute of Zhejiang Academy of Agricultural Sciences	Cultivars
Rs266	Yu Yan Yuan Luo Bo	Raphanus sativus L.	Vegetable Institute of Zhejiang Academy of Agricultural Sciences	Cultivars
Rs267	Luo Bo	Raphanus sativus L.	Vegetable Institute of Zhejiang Academy of Agricultural Sciences	Cultivars
Rs268	Tu Luo Bo	Raphanus sativus L.	Vegetable Institute of Zhejiang Academy of Agricultural Sciences	Cultivars
Rs269	Bai Ding Luo Bo	Raphanus sativus L.	Vegetable Institute of Zhejiang Academy of Agricultural Sciences	Cultivars
Rs270	Hong Ding Luo Bo	Raphanus sativus L.	Vegetable Institute of Zhejiang Academy of Agricultural Sciences	Cultivars
Rs271	Tu Luo Bo	Raphanus sativus L.	Vegetable Institute of Zhejiang Academy of Agricultural Sciences	Cultivars
Rs272	Sha Yan Luo Bo	Raphanus sativus L.	Vegetable Institute of Zhejiang Academy of Agricultural Sciences	Cultivars
W128H	18Q-RA441-1	Raphanus raphanistrum L.	Italy	Local cultivars
Rs274	Xin Sheng	Raphanus sativus L.	Shanxi Vegetable Institute	Local cultivars
Rs275	Da Hong Pao	Raphanus sativus L.	Beijing	Local cultivars
Rs276	Luo Bo	Raphanus sativus L.	Xuzhou, Jiangsu	Local cultivars
Rs277	De Zhou Xin Li Mei	Raphanus sativus L.	Dezhou, Shandong	Local cultivars
Rs278	Kun Ming Si Ji Luo Bo	Raphanus sativus L.	Kunming	Local cultivars
Rs279	LS18-YDXTC-4	Raphanus raphanistrum L.	India	Local cultivars
Rs280	Zhong Qing Hong	Raphanus sativus L.	Chongqing	Local cultivars
W169	18Q-RA504	Raphanus raphanistrum L.	Italy	Local cultivars
Rs282	Xin Li Mei	Raphanus sativus L.	Beijing	Local cultivars
Rs283	Wang Zhao Hong	Raphanus sativus L.	Horticulture of Black Academy of Agricultural Sciences	Local cultivars
Rs284	Tu Zhou Luo Bo	Raphanus sativus L.	Nanchang City, Jiangxi Province	Local cultivars
Rs285	Xin Li Mei	Raphanus sativus L.	Liaoning Academy of Agricultural Sciences	Local cultivars
Rs286	Pi Pa Ye Hong Yuan	Raphanus sativus L.	Pengxian County, Sichuan	Local cultivars
Rs287	Lu Ba Fen	Raphanus sativus L.	Wuqing County, Tianjin	Local cultivars
Rs288	Xiang Yang Hong	Raphanus sativus L.	Jinzhou City, Liaoning Province	Local cultivars
Rs289	Pu Xian Shui Luo Bo	Raphanus sativus L.	Puxian County, Shanxi Province	Local cultivars
Rs290	Zhu Jia Zha	Raphanus sativus L.	Tongcheng County, Anhui Province	Local cultivars
Rs291	Fu Bai Luo Bo	Raphanus sativus L.	Jurong County, Jiangsu Province	Local cultivars
Rs292	Ping Liang Lü	Raphanus sativus L.	Pingliang City, Gansu Province	Local cultivars
Rs293	Da Yuan Luo Bo	Raphanus sativus L.	Xingwen County, Sichuan	Local cultivars
Rs294	Da Bai Pao Zi	Raphanus sativus L.	Yangzhou City, Jiangsu Province	Local cultivars
Rs295	Xin Li Mei	Raphanus sativus L.	Mount Taishan District, Shandong Province	Local cultivars
Rs296	Yuan Gen Qing Ye	Raphanus sativus L.	Mabian County, Sichuan	Local cultivars
Rs297	Hong Xin Shui Luo Bo	Raphanus sativus L.	Yanzhou City, Shandong Province	Local cultivars
Rs298	Yuan Luo Bo	Raphanus sativus L.	Ningyuan County, Hunan Province	Local cultivars
Rs299	Tai Hu Wan Luo Bo	Raphanus sativus L.	Huzhou City, Zhejiang Province	Local cultivars
Rs300	LS18-CJLB-2	Raphanus raphanistrum L.	India	Local cultivars
Rs301	Unknown	Raphanus raphanistrum L.	unknown	unknown
Rs302	Mei Yu F1Mu Zhi	Raphanus sativus L.	Shenyang Fengnong Agriculture Co., Ltd	Commercial F1
Rs303	Ai Si Te Xiao	Raphanus sativus L.	Shenyang Jiahe Seed Co., Ltd	Commercial F1
Rs304	Sheng Yan Tian Shan Xue Er Hao	Raphanus sativus L.	Shandong Huasheng Agriculture Co., Ltd	Commercial F1
Rs305	Jing Yan Lü Ru Yu F1	Raphanus sativus L.	Jingyanyinong Seed Industry Technology Co., Ltd	Commercial F1
Rs306	Jing Yan Jing Hong 4Hao F1	Raphanus sativus L.	Jingyanyinong Seed Industry Technology Co., Ltd	Commercial F1
Rs307	Jing Yan Man Tang Hong F1	Raphanus sativus L.	Jingyanyinong Seed Industry Technology Co., Ltd	Commercial F1
Rs308	Jing Yan Xue Yu 182F1	Raphanus sativus L.	Jingyanyinong Seed Industry Technology Co., Ltd	Commercial F1
Rs309	Xi Shuai Ai Luo Xiao	Raphanus sativus L.	Beijing Sibeiqi Seed Co., Ltd	Commercial F1
Rs310	Zhong Shu Hong Ying Tao	Raphanus sativus L.	China Vegetable Seed Industry Technology Co., Ltd	Commercial F1
Rs311	Han Bai Yu Luo Bo	Raphanus sativus L.	Hebei Tuotou Agricultural Technology Co., Ltd	Commercial F1
Rs312	Fu Shan Chun Xue	Raphanus sativus L.	Hebei Tuotou Agricultural Technology Co., Ltd	Commercial F1
Rs313	Xian Feng Tian Cui Shui Guo 301	Raphanus sativus L.	Shijiazhuang Xianfeng Seed Industry Co., Ltd	Commercial F1
Rs314	De Chao Ban Dao Lü	Raphanus sativus L.	Dezhou Decheng Dechao Seed Industry Co., Ltd	Commercial F1
Rs315	Hong Hao Bai Yu	Raphanus sativus L.	Wuhan Honghao Agricultural Technology Co., Ltd	Commercial F1
Rs316	An Feng Xia He	Raphanus sativus L.	Beijing Anfeng Seedling Technology Co., Ltd	Commercial F1
Rs317	Jun1 Chuan Xue Ba Wang	Raphanus sativus L.	Beijing Junchuan Seed Industry Technology Co., Ltd	Commercial F1
Rs318	Feng Qiao Han Jiang Xue Lian	Raphanus sativus L.	Beijing Fengqiao Guoji Seed Co., Ltd	Commercial F1
Rs319	Wo Er Yu Long Luo Bo	Raphanus sativus L.	Shanghai Woer Agricultural Technology Co., Ltd	Commercial F1
Rs320	Da Yi Chun Luo Bo	Raphanus sativus L.	Beijing Dayi Seedling Co., Ltd	Commercial F1
Rs321	Bo Chuang Bai Yu Chun	Raphanus sativus L.	Wuhan Bochuanglinong Technology Co., Ltd	Commercial F1
Rs322	Hong Hao Hao Yu	Raphanus sativus L.	Wuhan Honghao Agricultural Technology Co., Ltd	Commercial F1
Rs323	Tian Hong Wang Qiu	Raphanus sativus L.	Tianhong Seed Industry in Wuchang District, Wuhan City	Commercial F1
Rs324	Jie Xia Mei 50	Raphanus sativus L.	Beijing Jielia Seed Industry Co., Ltd	Commercial F1
Rs325	Feng Qiao Bai Yu 1819	Raphanus sativus L.	Beijing Fengqiao Guoji Seed Co., Ltd	Commercial F1
Rs326	Hua Xing Ya Chun 606	Raphanus sativus L.	Kunming Huaxing Seed Industry Co., Ltd	Commercial F1
Rs327	Shi Bang Xue Wang Chun	Raphanus sativus L.	Beijing Shibang Jiahe Seed Technology Co., Ltd	Commercial F1
Rs328	De Ke Bai Yu Chun	Raphanus sativus L.	Yantai Dongtian Gaoke Seed Industry Co., Ltd	Commercial F1
Rs329	Ke Rui De Chun Mei Jiao	Raphanus sativus L.	Gaobeidian Keride Seed Technology Co., Ltd	Commercial F1
Rs330	Wei Feng Tian Cui Qing Shui Guo	Raphanus sativus L.	Laizhou Weifeng Seed Industry Co., Ltd	Commercial F1
Rs331	Dong Tian Mei Cui Qing Tian	Raphanus sativus L.	Yantai Dongtian Gaoke Seed Industry Co., Ltd	Commercial F1
Rs332	Bai Wang Shan Mei Sha Ying Tao	Raphanus sativus L.	Beijing Lvbaiwang Agricultural Technology Research Institute	Commercial F1
Rs333	Dong Tian Tian Ci Qing 1Hao	Raphanus sativus L.	Yantai Dongtian Gaoke Seed Industry Co., Ltd	Commercial F1
Rs334	Ke Rui De Man Tang Hong	Raphanus sativus L.	Gaobeidian Keride Seed Technology Co., Ltd	Commercial F1
Rs335	Ke Rui De Chao Ba Man Tang Hong	Raphanus sativus L.	Gaobeidian Keride Seed Technology Co., Ltd	Commercial F1
Rs336	Zhe Luo 6Hao	Raphanus sativus L.	Zhejiang Academy of Agricultural Sciences	Commercial F1
Rs337	Zhe Luo 60	Raphanus sativus L.	Zhejiang Academy of Agricultural Sciences	Commercial F1
Rs338	Chun Bu Lao	Raphanus sativus L.	Vegetable Institute of Zhejiang Academy of Agricultural Sciences	Commercial
Rs339	Nan Pan Zhou	Raphanus sativus L.	Vegetable Institute of Zhejiang Academy of Agricultural Sciences	Commercial
Rs340	Lan Xi Xiao Luo Bo	Raphanus sativus L.	Vegetable Institute of Zhejiang Academy of Agricultural Sciences	Commercial
Rs341	Xiao Shan Yi Dao Zhong	Raphanus sativus L.	Vegetable Institute of Zhejiang Academy of Agricultural Sciences	Commercial
Rs342	Ma Er Zao	Raphanus sativus L.	Vegetable Institute of Zhejiang Academy of Agricultural Sciences	Commercial
Rs343	Wei Xian Qing	Raphanus sativus L.	Vegetable Institute of Zhejiang Academy of Agricultural Sciences	Commercial
Rs344	Shui Jing Luo Bo	Raphanus sativus L.	Vegetable Institute of Zhejiang Academy of Agricultural Sciences	Commercial
Rs345	Yi Dian Hong	Raphanus sativus L.	Vegetable Institute of Zhejiang Academy of Agricultural Sciences	Commercial
Rs346	Chu Yu 2Hao	Raphanus sativus L.	Breeding company	Commercial F1
Rs347	Xin Li Mei	Raphanus sativus L.	Breeding company	Commercial F1
Rs348	Xin Mei 1Hao	Raphanus sativus L.	Breeding company	Commercial F1
Rs349	Tian Shan Mei Yu	Raphanus sativus L.	Breeding company	Commercial F1
Rs350	Chun Qiu Mei Yu	Raphanus sativus L.	Breeding company	Commercial F1
Rs351	Qiu Mei 40	Raphanus sativus L.	Breeding company	Commercial F1
Rs352	Qiu Mei 50	Raphanus sativus L.	Breeding company	Commercial F1
Rs353	Shu Guang 136	Raphanus sativus L.	Breeding company	Commercial F1
Rs354	Ya Zhou Mei Qiu	Raphanus sativus L.	Breeding company	Commercial F1
Rs355	Ji Xiang Chun Xia	Raphanus sativus L.	Breeding company	Commercial F1
Rs356	Jun Hang 51	Raphanus sativus L.	Breeding company	Commercial F1
