# Supplementary material for: Construction of SNP fingerprints and genetic diversity analysis of radish (Raphanus sativus L.)
Source: Front Plant Sci. 2024 Feb 2;15:1329890. doi: 10.3389/fpls.2024.1329890 (PMC10869463; doi:10.3389/fpls.2024.1329890)
Supplement: Supplementary Table 2 — 46 radish varieties used for KASP marker screening. [file Table_2.xlsx]

## Sheet: Sheet1
Supplementary Table S2. 46 radish varieties used for KASP marker screening
Code	Sample name	Scientific name	Source	Label
Rs006	Huai Yuan Chuan Xin Hong	Raphanus sativus L.	Huaiyuan County, Bengbu City, Anhui Province	Local cultivars
Rs019	Wen Xian Dong	Raphanus sativus L.	Wen County, Longnan City, Gansu Province	Local cultivars
Rs024	Fan Yu Man Chou Tai	Raphanus sativus L.	Panyu District, Guangzhou City, Guangdong Province	Local cultivars
Rs030	Gao Ba Bai Pi Zhang	Raphanus sativus L.	China	Local cultivars
Rs035	791	Raphanus sativus L.	China	Local cultivars
Rs036	Yun Meng Liang Bai	Raphanus sativus L.	Yunmeng County, Xiaogan City, Hubei Province	Local cultivars
Rs038	Wang Zhao Hong	Raphanus sativus L.	China	Local cultivars
Rs039	Nan Jing Sha Gao	Raphanus sativus L.	Nanjing City, Jiangsu Province	Local cultivars
Rs044	Da Lian Jin Liang Qing	Raphanus sativus L.	Dalian City, Liaoning Province	Local cultivars
Rs045	Shi Jia Zhuang Bai	Raphanus sativus L.	Shijiazhuang City, Hebei Province	Local cultivars
Rs046	Feng Cheng Luo Bo	Raphanus sativus L.	Fengcheng City, Yichun City, Jiangxi Province	Local cultivars
Rs047	Tu Zhou Luo Bo	Raphanus sativus L.	Tuzhou Village, Nanchang County, Nanchang City, Jiangxi Province	Local cultivars
Rs052	Qing 2Hao	Raphanus sativus L.	China	Local cultivars
Rs055	Qu Fu Ma Ti Huang	Raphanus sativus L.	Qufu City, Jining City, Shandong Province	Local cultivars
Rs064	Yue Pu Wan Zhang Bai	Raphanus sativus L.	China	Local cultivars
Rs072	Lang Zhong Chun Luo Bo	Raphanus sativus L.	Langzhong City, Nanchong City, Sichuan Province	Local cultivars
Rs073	Lu Zhou 60Zao	Raphanus sativus L.	Luzhou City, Sichuan Province	Local cultivars
Rs078	Fu Zao Luo Bo	Raphanus sativus L.	China	Local cultivars
Rs080	Ri Ben Ma Zhuang	Raphanus sativus L.	Japan	Local cultivars
Rs087	Shi Da Gen	Raphanus sativus L.	China	Local cultivars
Rs092	Xin Yuan Da CR-1	Raphanus sativus L.	China	Local cultivars
Rs093	Zao Hua Luo Bo	Raphanus sativus L.	Zhejiang Province, China	Local cultivars
Rs094	Hong Ding Luo Bo	Raphanus sativus L.	Beijing, China	Local cultivars
Rs095	Xin Wu Man Shen Hong	Raphanus sativus L.	Chengdu New Agriculture Wuhou Seed and Seedling Research Institute	Commercial
Rs096	Xin Wu Liu Shi Zao	Raphanus sativus L.	Chengdu New Agriculture Wuhou Seed and Seedling Research Institute	Commercial
Rs097	Xing Yan Jiu Jin Wang	Raphanus sativus L.	Guangdong Xingning Mingxing Seed Co., Ltd	Commercial
Rs098	Shui Jiang Duan Ye Shi San Hao Zao	Raphanus sativus L.	Guangzhou Shuijiang Seed Industry Co., Ltd	Commercial
Rs099	Xing Ke Feng Tang Guan	Raphanus sativus L.	Hangzhou Kefeng Seed Co., Ltd	Commercial
Rs100	Xing Ke Feng Xi Tou Jing Yuan Hong	Raphanus sativus L.	Hangzhou Kefeng Seed Co., Ltd	Commercial
Rs101	Xing Ke Feng Xi Tou Jing Yuan Bai	Raphanus sativus L.	Hangzhou Kefeng Seed Co., Ltd	Commercial
Rs102	Xing Ke Feng Yuan Bai	Raphanus sativus L.	Hangzhou Kefeng Seed Co., Ltd	Commercial
Rs103	Xing Ke Feng Ban Tou Hong	Raphanus sativus L.	Hangzhou Kefeng Seed Co., Ltd	Commercial
Rs104	Liang Feng Fen Hong Yi Dian Hong	Raphanus sativus L.	Hangzhou Liangfeng Vegetable Seed Co., Ltd	Commercial
Rs105	Liang Feng Yi Dian Hong	Raphanus sativus L.	Hangzhou Liangfeng Vegetable Seed Co., Ltd	Commercial
Rs106	Lü Feng Gou Bai Luo Bo	Raphanus sativus L.	Hangzhou Lvfeng Seed Co., Ltd	Commercial
Rs107	Lü Feng Da Yi Dian Hong	Raphanus sativus L.	Hangzhou Lvfeng Seed Co., Ltd	Commercial
Rs108	Lü Feng Yi Dian Hong	Raphanus sativus L.	Hangzhou Lvfeng Seed Co., Ltd	Commercial
Rs109	Lü Feng Zhe Da Zhang	Raphanus sativus L.	Hangzhou Lvfeng Seed Co., Ltd	Commercial
Rs229	Tu Luo Bo	Raphanus sativus L.	Vegetable Institute of Zhejiang Academy of Agricultural Sciences	Cultivars
Rs234	Shui Jing Luo Bo	Raphanus sativus L.	Vegetable Institute of Zhejiang Academy of Agricultural Sciences	Cultivars
Rs238	Yin Keng Luo Bo	Raphanus sativus L.	Vegetable Institute of Zhejiang Academy of Agricultural Sciences	Cultivars
Rs240	Sha Bu Cai Tou	Raphanus sativus L.	Vegetable Institute of Zhejiang Academy of Agricultural Sciences	Cultivars
Rs249	Xue Li Luo Bo	Raphanus sativus L.	Vegetable Institute of Zhejiang Academy of Agricultural Sciences	Cultivars
Rs250	Fen Hong Yi Dian Hong	Raphanus sativus L.	Vegetable Institute of Zhejiang Academy of Agricultural Sciences	Cultivars
Rs259	Xi Jing Di Xia Yuan Hong	Raphanus sativus L.	Vegetable Institute of Zhejiang Academy of Agricultural Sciences	Cultivars
Rs265	Si Que Luo Bo (Song Yang)	Raphanus sativus L.	Vegetable Institute of Zhejiang Academy of Agricultural Sciences	Cultivars
