# Supplementary material for: Construction of SNP fingerprints and genetic diversity analysis of radish (Raphanus sativus L.)
Source: Front Plant Sci. 2024 Feb 2;15:1329890. doi: 10.3389/fpls.2024.1329890 (PMC10869463; doi:10.3389/fpls.2024.1329890)
Supplement: Supplementary Table 3 — 32 candidate core SNP primers. [file Table_3.xlsx]

## Sheet: Sheet1
Supplementary Table 3 32 candidate core SNP primers
Marker	Chromosome	Position	Allele X/Y	Primer_AlleleFAM	Primer_AlleleHEX	Primer_Common	Sequence
Chr1-21	Chr1	18753042	T/C	GAAGGTGACCAAGTTCATGCTAGTTGTACGGATAGATGAT	GAAGGTCGGAGTCAACGGATTAGTTGTACGGATAGATGAC	CATGGACAAAATGCTTTCTTCTG	TTAGATCTCTTCAATCATATAGAGAGCACATTATTGATAAATATAAGCTTAACACCCAGACACAATATATAGATAGATACATAGTTGTACGGATAGATGA[T/C]AGACTGATAGATGATGAATAGATATCTGAAGAATCCTCTAGAATTCAGAAGAAAGCATTTTGTCCATGCCCCTGGAGGCATTGACAAACAGCACGAGTAT
Chr1-45	Chr1	58808047	T/A	GAAGGTGACCAAGTTCATGCTCATCTCTCACTCTCAGCGCATTCTT	GAAGGTCGGAGTCAACGGATTCATCTCTCACTCTCAGCGCATTCTA	TGTGAATTTGCTGTTTTTACGGACCTC	ACCCAATAACCACTTTTTTCATTTGTGTTGATCTAGTGATTAAACGAAATTTCTTGTGAATTTGCTGTTTTTACGGACCTCTTAAAGATTGTAGCAAATT[T/A]AGAATGCGCTGAGAGTGAGAGATGACAAGAAGAAGAACAAAAGAGAAGAAGATCAGAATGTAACTGATAGCATGAAAAAGAGTAGTATTTGGCATATTCA
Chr2-16	Chr2	14156674	C/T	GAAGGTGACCAAGTTCATGCTGAGTCAAAAAACTTTATTCCGTCTA	GAAGGTCGGAGTCAACGGATTGAGTCAAAAAACTTTATTCCGTCTG	ATGCATGTGAGACATTAGTGTC	CTTAGGTAATCATATTCAAACAATAGCTTCGAATATCACTTTTTCACCACATGCATGTGAGACATTAGTGTCTGCAGAAACGTAATATAGGGATCCGCTT[C/T]AGACGGAATAAAGTTTTTTGACTCTTGCGTGTAGTGACAAAGTGAAGAAGACACATCAAAGAAGACAATCACATGGAAAGACACCAACCTAGAATAATTT
Chr2-26	Chr2	44476246	G/A	GAAGGTGACCAAGTTCATGCTCAGAGACCTGTATAACAAATGATGT	GAAGGTCGGAGTCAACGGATTCAGAGACCTGTATAACAAATGATGC	AGAAGCTTTTTTACTATTCAAC	TGTAAATTATAAAATGGAGTAGCTCATGAAAGATTCAGCTAATAAATTAATTGATATTTAGAGAAGCTTTTTTACTATTCAACATCCCAGTTCTGAAGTG[G/A]CATCATTTGTTATACAGGTCTCTGCCTCTTCTTCTTCCAGCTGTGGAGGATGGTATTTTTAATGACAATTGGCGAATTCGTCAAAGTTCCGTTGAGCTGC
Chr2-27	Chr2	45748274	A/G	GAAGGTGACCAAGTTCATGCTGCATGTTGGCTAATATAGTCCA	GAAGGTCGGAGTCAACGGATTGCATGTTGGCTAATATAGTCCG	AAAACTCTTTCCCTGAACATGG	TCTTGGTATAGCTGTCAAGAACGAGTTGAGGAGGATCTTTTTTCGGACTCCATTACGAAATTTTGATGACCAGCTGTTAGCATGTTGGCTAATATAGTCC[A/G]CAATAACTGAACAATTATTGGAAAGACCTTTTTCCATGTTCAGGGAAAGAGTTTTCCTGCAGATATTCATACGAGGTTTATGGTTATTCAGTGAAAGTAT
Chr2-33	Chr2	54832993	G/T	GAAGGTGACCAAGTTCATGCTGTGTCGCGTTAGTTCTAAACTTGG	GAAGGTCGGAGTCAACGGATTGTGTCGCGTTAGTTCTAAACTTGT	TTGAGCACATCAAGATCCGGAAC	ACTAAGCTTACAAATATGCAAATGAGGTTTACATAAAACACTACAGTTCTGCGGTTGAATAATAAATCACATGTATAGTGTCGCGTTAGTTCTAAACTTG[G/T]ACGTGTTCTTAGTCTTGTCTGGCCATTTAGTTCCGGATCTTGATGTGCTCAAGAATTTGCAGTAGTTGTAAGTCCAACTTATGAAAACTGCACTCTAATT
Chr3-01	Chr3	301586	A/G	GAAGGTGACCAAGTTCATGCTCGACTTGCTCCTCAAATTGATAGGA	GAAGGTCGGAGTCAACGGATTCGACTTGCTCCTCAAATTGATAGGG	CTTAACCGCTTCACTAATGCCAAG	TCGCTTCAAGTGGTCTATTGATGATTCTCGTAAAGGCTGAGGGGTTCTTGGACAAAGATGTTATGGAGAAACTACACGACTTGCTCCTCAAATTGATAGG[A/G]GATCCCGTCTTTAAGTCGGAATTTGCGAAAGCGCTTGTGAGTTACTATCCACTTGGCATTAGTGAAGCGGTTAAGAATGGTCATGATCATGCATTCATGC
Chr3-02	Chr3	362352	G/A	GAAGGTGACCAAGTTCATGCTGTTCATTGCAGTTGATGAAAG	GAAGGTCGGAGTCAACGGATTGTTCATTGCAGTTGATGAAAA	TACACTCTTAATTTATTGTTCCTTCAGA	AATTTTACATCTGCAGTCTACTAATGGGTGAAAAAGGTTATTACTACAGTTAATTGTAAACTTGTCCAATAACCATCAAAGTTCATTGCAGTTGATGAAA[G/A]TTTGTATAATATGGTCTGACGGATATTTAAAACTTCCGATAAGCTTTTCTGAAGGAACAATAAATTAAGAGTGTACAATTATTTTATTATTATAATAATT
Chr3-17	Chr3	29949211	G/A	GAAGGTGACCAAGTTCATGCTCCCAGGGATACTTGCAGAACTCTTT	GAAGGTCGGAGTCAACGGATTCCCAGGGATACTTGCAGAACTCTTC	ACCCGTTGAGAGACTGCTGAGA	CTGAGATTAGGGGCTACTATCCTTGTGGAATCGATATTGATAGCCAACAATCCAGTTAATATAATACCCGTTGAGAGACTGCTGAGAGCTAGAAACTTTG[G\A]AAGAGTTCTGCAAGTATCCCTGGGGGAATGAAACCTATGATGCTCTACGTGCTGCAGTGGAGAAGATTGAAACTACAGATTTGGTGAAGGTGCAATATGG
Chr4-03	Chr4	1251819	T/A	GAAGGTGACCAAGTTCATGCTGGAAGTTGATGTTGAGGTT	GAAGGTCGGAGTCAACGGATTGGAAGTTGATGTTGAGGTA	ATATTAAGACAAGAGATCACCAGCTA	TACGTAATCATAAATATTTATATCTAACTAATACGATATATTAAGACAAGAGATCACCAGCTACATAATTAAGAGAGAACAAACATCTCAGCTCTTTAAA[T/A]ACCTCAACATCAACTTCCTTTCCTCTATTATCATCCTTTTGCAGAAGAAAACAGAAAAACAAAAGATCTTTATTTCTTCTTTTTAACTGCAGGTGGGTTT
Chr4-07	Chr4	2932692	C/G	GAAGGTGACCAAGTTCATGCTGTTTGCCACGACATCTTTTCC	GAAGGTCGGAGTCAACGGATTGTTTGCCACGACATCTTTTCG	ACGCCCTTCACGCTGCTCATAA	CATGACCAACGATTGCTGCAGCGGTTAGGTGATGACCCTGACCATCACCAACATCACACATCAAATGCTCATCAACGTAAGTTTGCCACGACATCTTTTC[C/G]TATCTTCTTCTTCTTTTTTCTTTTCTCTACGTTATATGTTATGAGCAGCGTGAAGGGCGTCGTCCTCTAGATAAATAGGGGAAGCGGAAAATAATGCGGC
Chr4-23	Chr4	34449708	C/T	GAAGGTGACCAAGTTCATGCTGACATAAGGAGTTTCCTTGA	GAAGGTCGGAGTCAACGGATTGACATAAGGAGTTTCCTTGG	TCTAGCAATCTTACTGAAATCC	GGTGTAAAATCGAATTTAACCTCTTTGCATAGAAGATTATTCAAAGGTCTAGCAATCTTACTGAAATCCTGTATGAATCTTCTGTAAAATCCGTCATGTC[C\T]CAAGGAAACTCCTTATGTCTTTAACGTTTGTGGGTGCCGGTAGACCAGTCATTACTTCGATTTTAGCCCTGTCTACTTCTATTCTAGCTGCAGAAACTTT
Chr4-33	Chr4	44369429	T/G	GAAGGTGACCAAGTTCATGCTCGGCTTGGTCGTTCATCTAAC	GAAGGTCGGAGTCAACGGATTCGGCTTGGTCGTTCATCTAAA	ACTTAAGTATGTTTTTTTTTTCTTTGTCT	GACTTCTCACCTTTCATAACAGTAAAGGCAAGTTTTAACTAATACTTAAGTATGTTTTTTTTTTCTTTGTCTTGACAGTTGTTTTGGTTTATTGACGTTT[T\G]TTAGATGAACGACCAAGCCGCGCCTGAGTACGTGAATTCTAAAACGACTGTGTGGTGGGACATGGACACCTGTCCACTTCCCGATGGTTACGATGCTCGC
Chr5-12	Chr5	11242018	A/G	GAAGGTGACCAAGTTCATGCTAGGTAGGACGTACATTGCAGTGC	GAAGGTCGGAGTCAACGGATTAGGTAGGACGTACATTGCAGTGT	CAAGAGAGCTCAATGCTGGCCAAGAA	GCTTGAAGGTGAACAATAACAAAAGGAAGGCGGATCAAGAGAGCTCAATGCTGGCCAAGAAAATGAAGATTGAAAGTTTTCTGTTTCCTGATGAATCTGA[A/G]CACTGCAATGTACGTCCTACCTCGAGTAGTGGTGTCCCTGCGCCGTCAGCAGAGAAGAATTCAAAGGCTCGAGTCACCTCTAAAATGCGAAAAGAGGAAG
Chr5-22	Chr5	33498683	T/C	GAAGGTGACCAAGTTCATGCTGCTTCAGCTGTATCTCTTAGCTGT	GAAGGTCGGAGTCAACGGATTGCTTCAGCTGTATCTCTTAGCTGC	GAAAGTGCAAAGAGAGAAAGAGGC	TGAAACGTACCTGTGCAATTTTCAATCCTTCTTCAGCTTCCTTAAGTCGAACAAGTAACTCTCCTGCTGCTTCAACAGCTTCAGCTGTATCTCTTAGCTG[T/C]GACTGGAGACTCTTGTTCTCATCTCTGAAGTATTGTGCCTCTTTCTCTCTTTGCACTTTCAAAGCTGAGATTTCTGCAGCAAGTGCGTTTATGAATCTGG
Chr5-24	Chr5	35234907	T/C	GAAGGTGACCAAGTTCATGCTGGAAAGAAAGACACTGGAAG	GAAGGTCGGAGTCAACGGATTGGAAAGAAAGACACTGGAAA	AACTTTGTTATTTTTATGGTTCCCACC	TGATGATGGTTAAATCATTTTGATATGAAACTTTGTTATTTTTATGGTTCCCACCATAATACTGACGTGTAACCACATCATCCTCCGTCCATCTTTCTCT[T/C]TTCCAGTGTCTTTCTTTCCTTTGGTCTGCAGATTTTTTTCCTACCATTTGGTAGAAGCCACAATAACGACAAATAAATGAGTACCGACAATATATGTGGT
Chr5-34	Chr5	43324346	C/T	GAAGGTGACCAAGTTCATGCTGCAGTAACAGAGTCGTTTCATC	GAAGGTCGGAGTCAACGGATTGCAGTAACAGAGTCGTTTCATT	TAAGCTGTGCGTAGATGATTGATA	AGTATACCTCCTCAGTTGATTTAAGGTAATATATGCGGTGGATTTGAAAGTCCCTCCATGTCTATCTCTGGAAGAAACTGCAGTAACAGAGTCGTTTCAT[C/T]AATAAATTACCAAAGAGGTGACATATATATCAATCATCTACGCACAGCTTACATGTGTATTCCTCACCTAATGTTTCACATATGCGGAAAATGAAGTATT
Chr5-36	Chr5	44922478	G/A	GAAGGTGACCAAGTTCATGCTCACCAGGCTTTCTGTTTTTGACTAT	GAAGGTCGGAGTCAACGGATTCACCAGGCTTTCTGTTTTTGACTAC	ACCACCAACCCTCATGAACCGT	AGAGAAAACCAGAGCAAAGATGAAAACTCTATCTATAAAACCAAAATTTCAAACCACCAACCCTCATGAACCGTTTGAGCAGGTTACGGATATAAGACCG[G/A]TAGTCAAAAACAGAAAGCCTGGTGAGCTGGTTTAGCAAACTAATCCTTGAATTTTCAATCAGTAAAATCTTTGAATCGGCTAGTAGAAGCTGCAAGTCAA
Chr6-06	Chr6	30694641	G/A	GAAGGTGACCAAGTTCATGCTGTCAAACACTAGTACTTAGGACAG	GAAGGTCGGAGTCAACGGATTGTCAAACACTAGTACTTAGGACAA	TTTACGGTTATTGTGTTATTCATAC	CTATTATGGGCAAAAGCAACCATGGTCCATGGCAGCTACCACTGAACAGTTGGAATAATTTAAATATTCGTGTCAATGTCAAACACTAGTACTTAGGACA[G/A]TAAGTAGGGTTAGATTAGATGTTCGTACGAATGTCATAATTATGTACTGCAGTATGAATAACACAATAACCGTAAACACTATGTAGCATTAAAATCCCTT
Chr6-15	Chr6	38117650	A/G	GAAGGTGACCAAGTTCATGCTTTCACTTGCAGCCTTGTTGCTCC	GAAGGTCGGAGTCAACGGATTTTCACTTGCAGCCTTGTTGCTCT	CCCAACGATTTCCAGTTACCAT	AGCAAAAGAGGCAAGCCAATTCTTACCCGTCACATAACTGGAAACCTTTGCACTGGCTGCAGACCCAACGATTTCCAGTTACCATCAGTGTACAGCAATG[A/G]GAGCAACAAGGCTGCAAGTGAACCATGATAAAATCCTCCTTCATGGGGCGAATGATCTCACCAAGCTAAAAACGTACACAAATAATATCAACAAGTAAAC
Chr6-19	Chr6	42865438	A/T	GAAGGTGACCAAGTTCATGCTCGCTCATGAATTCTACTTTA	GAAGGTCGGAGTCAACGGATTCGCTCATGAATTCTACTTTT	CCCAGCAGCGTAAGAAGAGACAGGTA	AAAATCTAATCAACATACAAAATACAAACTCCAGATCCGTTGAAAGGTACCAACAATAAAATACAAAGTTCGCATATAATTCGCTCATGAATTCTACTTT[A/T]AAACCAAGGTATTAATAGATATGAAGCTATATGTATTACCTGTCTCTTCTTACGCTGCTGGGAAAGAGCAGCATTACAATCTGTCAGTTCTGTAATAACT
Chr6-20	Chr6	43227414	T/A	GAAGGTGACCAAGTTCATGCTGGTAACCGTTCATCGTGTTAATT	GAAGGTCGGAGTCAACGGATTGGTAACCGTTCATCGTGTTAATA	GTTGCTGCAGGATTCATTAGTT	CCCAATACTTTGTATTAGCTGTTAAAATTAAAAAACATATTTTTTTCTCTGTTGCTGCAGGATTCATTAGTTATGACTCACAAGAAGCTGCTCAAAACGC[T/A]ATTAACACGATGAACGGTTACCAATTAAGCGGTAAGAAGTTGAAAGTTGAGGTCAAGAGAGAAAACGGCCAACAACAACAGAGTAACAAACCTGTAAACA
Chr7-02	Chr7	16504349	C/T	GAAGGTGACCAAGTTCATGCTTTCGTTCCACCCATGCTAA	GAAGGTCGGAGTCAACGGATTTTCGTTCCACCCATGCTAG	CGTGCCGTCAGTGAGGCTTGTA	GGCTGGACGAACTGCAGGTATTGTAGATCGCCAACTGTTATAATGTACATCGTGCCGTCAGTGAGGCTTGTACCATACAATAAAGTTAGATGTTCCTTTG[C/T]TAGCATGGGTGGAACGAATTTTAGCATCTGTTATGTTGGTGCGATCAAGGAGATCCGTGATGTACTTGGTTTGAGTCAATAGAAGACCAAAGGTTGAGTG
Chr7-12	Chr7	27487519	G/C	GAAGGTGACCAAGTTCATGCTAAATTGGCTGACATATGAAG	GAAGGTCGGAGTCAACGGATTAAATTGGCTGACATATGAAC	GTAGGTCCTTGGCTCTTTCCGAAT	CTACTTTGTTTATCACAACTGCAGTAGGTCCTTGGCTCTTTCCGAATGACCTAGGTTATGCTCTGGCTGCTTGTTCAGCTGACCTCTTATTTCTTTCTAT[G/C]TTCATATGTCAGCCAATTTATTTCTATTAACTCAGCATGCCTCTAGTTTCTTTTCCTCTCTTGCAACAATTCTCATATTACTTCTTTGTCTTTGTGTTTT
Chr7-23	Chr7	36882600	G/A	GAAGGTGACCAAGTTCATGCTTCCTTCCAACAAGATGACCGT	GAAGGTCGGAGTCAACGGATTTCCTTCCAACAAGATGACCGC	ACACGCAATATATAAACCACTTG	CAGGTCTTGTATCAACCCCATATGCGGGTCTCACCTTTAAGTTGACACGCAATATATAAACCACTTGACACTAGTTTTTTGGCAGGGAAAGTATTCACTG[G\A]CGGTCATCTTGTTGGAAGGAATTGGATCTCTACCACCCTCGTTGGCATTCGAGAGAATTGCAATCTGCAGAAGAAAGGTTTTCACGCTATTGCGGAGTGT
Chr8-10	Chr8	20479094	G/A	GAAGGTGACCAAGTTCATGCTCACGCCAAGACAAAAAATGT	GAAGGTCGGAGTCAACGGATTCACGCCAAGACAAAAAATGC	AATCCCTCTTTCTGGCCTTCCCT	TTTTGCTAGTCACGACAGGGATTTTGTCACTGCAGTCTCAAATCCCTCTTTCTGGCCTTCCCTAAAGTTCTACACTCAGAAGATCTGTTCTCAACTCCAG[G\A]CATTTTTTGTCTTGGCGTGTTCAGTTTCTAAAACGACGTGACATCAAAGGAGCAGCCCTTATTGCGGACAGTGTCATCAAAGAGGATCGCTTTCAATCAT
Chr8-23	Chr8	35858487	G/T	GAAGGTGACCAAGTTCATGCTACATTCGCATGGTCCAACAGTCA	GAAGGTCGGAGTCAACGGATTACATTCGCATGGTCCAACAGTCC	AACGATAAGGTATTGTGGAATG	TTAAGAAGAAATCTAGTTGGCCTGTATAGATCAACGCCTCCCCGATACCAACGATAAGGTATTGTGGAATGAGTAGATAAAACCCTAGAGGAAGCGTTTG[G\T]GACTGTTGGACCATGCGAATGTGCGGTTCTAAGACGTTTGATCTCTACCAAAGCAGCTGCAGCCATACCCACGGCTGCGAATATGAGACCTAAACCAATG
Chr9-01	Chr9	652195	G/A	GAAGGTGACCAAGTTCATGCTTTCCGACCAACGAACCATCAG	GAAGGTCGGAGTCAACGGATTTTCCGACCAACGAACCATCAA	ATCTTTGTGGTCGGAGTTGCCA	TTCGTACCCAACGTAACCTTCCGTTGGGGGAGTGGCGTGTAATTGAAAACTTTAAGGTATCTGCAGTGGGTAAAGGGAAATTCCGACCAACGAACCATCA[G/A]TATAAAATTACTATCACCAATGAAACTGTTTTTGGCAACTCCGACCACAAAGATGATAGCCCTTTCTTGAGTTTAGCCAATTATGAAAGGATTTCAAACG
Chr9-02	Chr9	1929299	A/G	GAAGGTGACCAAGTTCATGCTTTTCAGCCCAATCCATCTA	GAAGGTCGGAGTCAACGGATTTTTCAGCCCAATCCATCTG	TTTAACGGTTTATTTCCCTGTGGAGA	ATGTCTTGACACTACTTATGAGTCCTGCGATGGAACCAGCTGCAGCTAAAAGGGAGACGATCAAGCAAACCCAGCACAACATTTTCAGCCCAATCCATCT[A/G]GGGGAGTACTTCTTAACCTTAGTTTGTGCTATGTGCATCTCCACAGGGAAATAAACCGTTAAAGGCCAGAAGGAAGCTGCTCCAATAAGACCCAAGATCG
Chr9-14	Chr9	15485852	G/T	GAAGGTGACCAAGTTCATGCTAAGGTTGTCGCTCTCCGTCTCTCG	GAAGGTCGGAGTCAACGGATTAAGGTTGTCGCTCTCCGTCTCTCT	TTCAGAGTAGCCAATTTGGCATAGGCC	ATTTGCTCATGAGGTTGATGGTCCTCTGTTCATGATCCTAAATGATCTCGTTTGCCTCACTCTTTGTACGAGGCCTCAAGGTTGTCGCTCTCCGTCTCTC[G/T]CTTCTTTAGAGGAGAAAGAGGCCTATGCCAAATTGGCTACTCTGAATTCTAAGTGAGTCTTGAAGTAACTCTCATTGCTGATTCATTCATTCGCGAGTTT
Chr9-22	Chr9	40713031	C/T	GAAGGTGACCAAGTTCATGCTGGAGAAGTTAGCGCAAGAAGAGAAA	GAAGGTCGGAGTCAACGGATTGGAGAAGTTAGCGCAAGAAGAGAAG	AAACCACCTTCTCTCTGACGCCATCAA	AATTTATGGTCGGTAAAAATTCCAGAAAGCTAAAAATAGATTCTATCAACAAAATGAAAACCACCTTCTCTCTGACGCCATCAAGAACAGCCCACATGTA[C/T]TTCTCTTCTTGCGCTAACTTCTCCTCTTTCAAAATCCTTTTCTCCTGCACATCATTAACATTACAATATTGTCAACAGCAGCACATCAGCAATTCAGCAT
Chr9-24	Chr9	42576246	C/T	GAAGGTGACCAAGTTCATGCTCACAAGCCTTAAAGTTAATGA	GAAGGTCGGAGTCAACGGATTCACAAGCCTTAAAGTTAATGG	GTTTTGTACTATTGCGAGCAAA	ATCATGCGTTGTTGAATGGGTTTTAGATATATGGATACATGTGTAAATTGTTATAACCTAAGTTTTGTACTATTGCGAGCAAATGCGTGGACCATTTGGC[C\T]CATTAACTTTAAGGCTTGTGTTTGGATGTTTTATACGTGGTAGAACTGCAGATAATTCGTCCGCTCTAGGGTCTACTCAACTAAACTTAGTCAACTGCAG
