# Supplementary material for: Construction of SNP fingerprints and genetic diversity analysis of radish (Raphanus sativus L.)
Source: Front Plant Sci. 2024 Feb 2;15:1329890. doi: 10.3389/fpls.2024.1329890 (PMC10869463; doi:10.3389/fpls.2024.1329890)
Supplement: Supplementary Table 4 — P-distance between 356 radish materials. [file Table_4.xlsx]

## Sheet: Sheet1
Supplementary Table 4 P-distance between 356 radish materials
Marker	Allele	Rs001	Rs002	Rs003	Rs004	Rs005	Rs006	Rs007	Rs008	Rs009	Rs010	Rs011	Rs012	Rs013	Rs014	Rs015	Rs016	Rs017	Rs018	Rs019	Rs020	Rs021	Rs022	Rs023	Rs024	Rs025	Rs026	Rs027	Rs028	Rs029	Rs030	Rs031	Rs032	Rs033	Rs034	Rs035	Rs036	Rs037	Rs038	Rs039	Rs040	Rs041	Rs042	Rs043	Rs044	Rs045	Rs046	Rs047	Rs048
Chr1_21	C	0	1	0.5	0	0	0	0	1	0	0	0	0	0.5	0	0	0	0	0.5	0	0	0	0	0	1	0	0	1	0.5	0	0	1	0.5	0.5	0	0	0.5	0	0	0.5	0	0	0	0	0	0.5	0.5	0	0
Chr1_21	T	1	0	0.5	1	1	1	1	0	1	1	1	1	0.5	1	1	1	1	0.5	1	1	1	1	1	0	1	1	0	0.5	1	1	0	0.5	0.5	1	1	0.5	1	1	0.5	1	1	1	1	1	0.5	0.5	1	1
Chr1_45	A	0	0	0.5	0	0	1	0	0.5	0	0	0.5	0.5	0	0	0	0.5	0	0	0	0	0.5	0	0	0	0	0	0	0.5	0	0.5	1	0.5	0	0.5	0	1	0	0.5	0	0	0	0	1	0	0.5	0.5	0	0
Chr1_45	T	1	1	0.5	1	1	0	1	0.5	1	1	0.5	0.5	1	1	1	0.5	1	1	1	1	0.5	1	1	1	1	1	1	0.5	1	0.5	0	0.5	1	0.5	1	0	1	0.5	1	1	1	1	0	1	0.5	0.5	1	1
Chr2_16	C	1	1	1	1	1	1	1	0.5	1	0	0	1	0.5	1	0.5	1	0	1	0	0	1	1	0.5	1	1	1	0	1	1	1	0	1	1	1	1	1	1	1	0	1	1	1	0.5	1	1	0.5	0.5	0.5
Chr2_16	T	0	0	0	0	0	0	0	0.5	0	1	1	0	0.5	0	0.5	0	1	0	1	1	0	0	0.5	0	0	0	1	0	0	0	1	0	0	0	0	0	0	0	1	0	0	0	0.5	0	0	0.5	0.5	0.5
Chr2_26	A	0	0	0	1	0	0	1	0	1	0	0	1	0.5	1	0.5	0	0	0	0	0	1	1	0.5	0	0.5	1	0	1	0	0	0	0	0	1	1	1	0	0	0	0.5	0	0	0	0	0.5	0	0.5	0.5
Chr2_26	G	1	1	1	0	1	1	0	1	0	1	1	0	0.5	0	0.5	1	1	1	1	1	0	0	0.5	1	0.5	0	1	0	1	1	1	1	1	0	0	0	1	1	1	0.5	1	1	1	1	0.5	1	0.5	0.5
Chr2_27	A	0	1	1	0.5	1	1	1	0	0	0	0	0	0.5	0	1	0.5	0.5	0.5	1	1	1	0	0.5	1	1	0	1	1	0	1	1	1	0	1	0	0	1	1	0	0.5	0	1	1	0.5	0.5	0.5	1	1
Chr2_27	G	1	0	0	0.5	0	0	0	1	1	1	1	1	0.5	1	0	0.5	0.5	0.5	0	0	0	1	0.5	0	0	1	0	0	1	0	0	0	1	0	1	1	0	0	1	0.5	1	0	0	0.5	0.5	0.5	0	0
Chr2_33	G	1	0.5	0.5	0.5	0	0	1	0	0	1	0	1	0.5	0	1	1	0	1	0	1	1	1	0.5	1	1	1	0	0	1	0	1	1	0	0	0.5	1	1	0	0	0.5	0.5	0	0	0.5	0	1	1	0
Chr2_33	T	0	0.5	0.5	0.5	1	1	0	1	0	0	1	0	0.5	1	0	0	1	0	1	0	0	0	0.5	0	0	0	1	1	0	0	0	0	1	1	0.5	0	0	1	1	0.5	0.5	1	1	0.5	1	0	0	1
Chr3_1	A	1	0.5	0.5	0.5	1	1	0	0.5	1	0.5	0.5	0	0.5	0.5	0	0.5	1	0.5	1	1	1	1	1	0	1	1	1	0	1	0.5	1	0.5	0	0	1	0	1	1	0.5	0.5	0.5	0	0	1	0	0.5	0.5	0.5
Chr3_1	G	0	0.5	0.5	0.5	0	0	1	0.5	0	0.5	0.5	1	0.5	0.5	1	0.5	0	0.5	0	0	0	0	0	1	0	0	0	1	0	0.5	0	0.5	1	1	0	1	0	0	0.5	0.5	0.5	1	1	0	1	0.5	0.5	0.5
Chr3_17	A	0	0	0	0.5	0	0.5	0	0	0	0	0	1	0	0	1	0.5	1	0	0	0	1	0	0	0	0.5	0	0	0	0.5	0.5	0	0	0	0.5	0	1	0	0	0	0	0	0	0	0	0	0	0	0
Chr3_17	G	1	1	1	0.5	1	0.5	1	1	1	1	1	0	1	1	0	0.5	0	1	1	1	0	1	1	1	0.5	1	1	1	0.5	0.5	1	1	1	0.5	1	0	1	1	1	1	1	1	1	1	1	1	1	1
Chr3_2	A	1	1	1	0.5	0	1	1	1	1	0.5	0.5	1	0	1	1	0.5	0	1	1	1	1	1	0	1	1	1	0	1	1	0	1	0.5	1	1	0	1	0	0	1	1	1	1	1	0	1	1	1	0.5
Chr3_2	G	0	0	0	0.5	1	0	0	0	0	0.5	0.5	0	0	0	0	0.5	0	0	0	0	0	0	1	0	0	0	1	0	0	0	0	0.5	0	0	1	0	0	1	0	0	0	0	0	1	0	0	0	0.5
Chr4_23	C	1	1	0.5	0.5	1	1	1	1	1	0	0.5	0	1	0	0	1	0	0.5	1	1	0.5	1	0.5	0	1	1	1	1	0	1	1	1	1	0	1	0	1	1	0	1	0	0.5	0	0.5	1	1	0.5	0.5
Chr4_23	T	0	0	0.5	0.5	0	0	0	0	0	1	0.5	1	0	1	1	0	1	0.5	0	0	0.5	0	0.5	1	0	0	0	0	1	0	0	0	0	1	0	1	0	0	1	0	1	0.5	1	0.5	0	0	0.5	0.5
Chr4_3	A	1	0	1	1	1	0.5	1	1	1	1	1	1	0.5	1	0	0.5	1	0.5	1	0	0	0	1	0	0	0	1	0	1	1	1	1	1	0.5	1	0.5	1	1	1	0	0	0	1	1	0.5	1	0.5	0.5
Chr4_3	T	0	1	0	0	0	0.5	0	0	0	0	0	0	0.5	0	1	0.5	0	0.5	0	1	1	1	0	1	1	1	0	1	0	0	0	0	0	0.5	0	0.5	0	0	0	1	1	1	0	0	0.5	0	0.5	0.5
Chr4_33	G	1	1	0.5	0.5	0	1	1	0	0	0	0.5	1	0.5	0	0	0	0	0.5	0	0	0	0	0.5	1	0	1	1	1	1	0	0	0	0	0	1	0.5	1	1	0	1	1	1	0	0	0.5	0.5	0	0.5
Chr4_33	T	0	0	0.5	0.5	1	0	0	1	1	1	0.5	0	0.5	1	1	1	1	0.5	1	1	1	1	0.5	0	1	0	0	0	0	0	1	1	1	1	0	0.5	0	0	1	0	0	0	1	1	0.5	0.5	1	0.5
Chr4_7	C	1	1	0	1	0	1	1	1	1	1	1	1	1	0	1	1	0	0	0	1	0	1	0.5	0	1	1	1	1	1	0	1	1	1	1	1	0.5	0	1	1	1	1	1	1	1	1	1	0.5	0.5
Chr4_7	G	0	0	1	0	1	0	0	0	0	0	0	0	0	1	0	0	1	1	1	0	1	0	0.5	1	0	0	0	0	0	1	0	0	0	0	0	0.5	1	0	0	0	0	0	0	0	0	0	0.5	0.5
Chr5_12	A	0.5	0.5	1	0.5	0.5	1	0.5	1	0	1	0.5	1	1	0	0	1	1	1	1	0	0.5	1	0.5	1	1	0	1	1	1	0.5	0	1	0	1	1	0.5	1	1	0	0	1	0	0.5	1	1	0.5	0.5	1
Chr5_12	G	0.5	0.5	0	0.5	0.5	0	0.5	0	1	0	0.5	0	0	1	1	0	0	0	0	1	0.5	0	0.5	0	0	1	0	0	0	0.5	1	0	1	0	0	0.5	0	0	1	1	0	1	0.5	0	0	0.5	0.5	0
Chr5_22	C	1	0	0	0	0.5	1	0	0.5	1	0	0.5	0	0	1	0	0	0	0	0	0	0	0	0	0	0	0	0	1	1	0	0	1	0.5	0.5	1	0	0	0	0.5	0	0	0	1	0	0.5	0.5	0	0
Chr5_22	T	0	1	1	1	0.5	0	1	0.5	0	1	0.5	1	1	0	1	1	1	1	1	1	1	1	1	1	1	1	1	0	0	0	0	0	0.5	0.5	0	1	1	1	0.5	1	1	0	0	1	0.5	0.5	1	1
Chr5_24	C	0	0.5	0.5	0.5	1	0	0	0.5	1	1	0.5	1	0.5	1	1	1	1	1	0	0.5	1	1	1	1	1	1	0	1	1	0	0	0	0	0	0	0.5	0	1	0.5	0	0	1	0	1	1	1	1	0.5
Chr5_24	T	1	0.5	0.5	0.5	0	1	1	0.5	0	0	0.5	0	0.5	0	0	0	0	0	1	0.5	0	0	0	0	0	0	1	0	0	0	1	1	1	1	1	0.5	1	0	0.5	1	1	0	1	0	0	0	0	0.5
Chr5_34	C	0	1	0.5	0.5	0	1	1	1	1	0	1	1	0.5	1	0.5	0.5	1	0.5	0	1	0.5	1	0.5	0.5	1	1	0	0	0	0	1	1	0.5	0	0	1	0	1	0	0	0	1	1	1	1	1	1	0
Chr5_34	T	1	0	0.5	0.5	1	0	0	0	0	1	0	0	0.5	0	0.5	0.5	0	0.5	1	0	0.5	0	0.5	0.5	0	0	1	1	1	0	0	0	0.5	1	1	0	1	0	1	1	1	0	0	0	0	0	0	1
Chr5_36	A	0	0	0	0.5	1	0	0	0	0	0	0	1	0	0	0.5	0	0	0	0	0	0	0	0	0	0	0	0	0	0	0	0	0	0.5	0	0	0	0	0	1	0	0	0	0	0	0	0	0	0
Chr5_36	G	1	1	1	0.5	0	1	1	1	1	1	1	0	1	1	0.5	1	1	1	1	1	1	1	1	1	1	1	1	1	1	1	1	1	0.5	1	1	1	1	1	0	1	1	1	1	1	1	1	1	1
Chr6_15	A	1	1	0	0.5	0	0	0	0	0	1	0.5	0	0	0	0	0	0	0	0	0	0	1	0	0	0	0	0	0	1	0	0	1	0	0	0	1	0	0.5	1	1	0	1	0	0	0	0.5	1	1
Chr6_15	G	0	0	1	0.5	1	1	1	1	1	0	0.5	1	1	1	1	1	1	1	1	1	1	0	1	1	1	1	1	1	0	1	1	0	1	1	1	0	1	0.5	0	0	1	0	1	1	1	0.5	0	0
Chr6_19	A	1	1	1	0	1	1	1	0	1	1	1	0.5	0.5	0.5	0	1	0	0.5	1	0	1	1	1	1	0.5	1	1	0	0	1	0	1	1	1	1	1	0	1	0	0	0.5	0	0	1	1	1	1	1
Chr6_19	T	0	0	0	1	0	0	0	1	0	0	0	0.5	0.5	0.5	1	0	1	0.5	0	1	0	0	0	0	0.5	0	0	1	1	0	1	0	0	0	0	0	1	0	1	1	0.5	1	1	0	0	0	0	0
Chr6_20	A	0	1	1	1	1	0	0.5	0.5	1	1	1	1	1	1	1	1	0	1	1	1	1	1	1	1	1	0.5	1	0	1	1	0	0	0	0.5	1	1	1	0	1	0	0.5	0	1	1	0	0	0.5	0.5
Chr6_20	T	1	0	0	0	0	1	0.5	0.5	0	0	0	0	0	0	0	0	1	0	0	0	0	0	0	0	0	0.5	0	1	0	0	1	1	1	0.5	0	0	0	1	0	1	0.5	1	0	0	1	1	0.5	0.5
Chr6_6	A	0	0	0	0	0	0	0	0.5	0	0	0	0	0	0	0	0	0	0	0	0	0	0	0	0	1	1	1	0	0	0	0	0	0	0	0	1	0	0	0	0	0	0	1	0	0.5	0.5	0	0
Chr6_6	G	1	1	1	1	1	1	1	0.5	1	1	1	0	1	1	1	1	1	0	1	1	1	1	1	1	0	0	0	1	1	1	1	1	1	1	1	0	1	1	1	1	1	1	0	1	0.5	0.5	1	1
Chr7_12	C	0	1	1	0.5	1	1	1	0	0.5	0	0.5	1	0.5	1	1	1	1	1	0	0.5	1	1	0.5	1	1	1	0	0	0.5	0	1	0	0.5	0.5	0.5	0	1	0.5	1	1	1	0	1	0	0	0	0.5	1
Chr7_12	G	1	0	0	0.5	0	0	0	1	0.5	1	0.5	0	0.5	0	0	0	0	0	1	0.5	0	0	0.5	0	0	0	1	1	0.5	0	0	1	0.5	0.5	0.5	1	0	0.5	0	0	0	1	0	1	1	1	0.5	0
Chr7_2	C	1	1	1	1	1	1	1	1	0	1	0.5	1	1	0	0	1	1	0.5	1	1	1	1	0.5	1	0	0.5	1	1	1	1	1	1	0.5	1	1	0	1	1	1	1	1	1	1	1	1	0.5	0.5	0
Chr7_2	T	0	0	0	0	0	0	0	0	1	0	0.5	0	0	1	1	0	0	0.5	0	0	0	0	0.5	0	1	0.5	0	0	0	0	0	0	0.5	0	0	1	0	0	0	0	0	0	0	0	0	0.5	0.5	1
Chr7_23	A	0	0	0	0	1	0	0	0	0	0	0	0	0.5	0	1	0	0	0	0	0	0	0	0	0	0	0	0	1	0	0.5	0	0	0	0	0	0	0	0	0	0	0	0	0	0	0	0	0.5	0.5
Chr7_23	G	1	1	1	1	0	1	1	1	1	1	1	1	0.5	1	0	1	1	1	1	1	1	1	1	1	1	1	1	0	1	0.5	1	1	1	1	1	1	1	1	1	1	1	1	1	1	1	1	0.5	0.5
Chr8_10	A	1	0	1	0	0	0	1	1	0	1	1	0.5	0.5	0	0.5	0.5	1	1	1	0	1	0	0.5	1	0	0	1	1	0.5	1	1	0	1	0.5	0	1	0	0	1	1	1	1	1	0	1	1	0.5	0
Chr8_10	G	0	1	0	1	1	1	0	0	1	0	0	0.5	0.5	1	0.5	0.5	0	0	0	1	0	1	0.5	0	1	1	0	0	0.5	0	0	1	0	0.5	1	0	1	1	0	0	0	0	0	1	0	0	0.5	1
Chr8_23	G	1	0	0	1	0	1	0.5	0	1	0	0	1	0.5	0	0	0.5	1	0	1	0	0	0	0.5	0	0	1	0	0.5	1	0.5	0	0.5	1	0.5	0	0.5	1	0.5	0	1	0	1	1	0	0.5	1	0.5	0.5
Chr8_23	T	0	1	1	0	1	0	0.5	1	0	1	1	0	0.5	1	1	0.5	0	1	0	1	1	1	0.5	1	1	0	1	0.5	0	0.5	1	0.5	0	0.5	1	0.5	0	0.5	1	0	1	0	0	1	0.5	0	0.5	0.5
Chr9_1	A	0	0.5	0.5	1	0	0.5	0	0	0	0	0	0	0	0	0	0	0	0	0	0.5	0	0	0.5	0	0	0	0	0	0	0	0	0	0.5	1	0	0.5	0	0.5	0	0.5	0	0.5	0	0	0	0	0	0
Chr9_1	G	1	0.5	0.5	0	1	0.5	1	1	1	1	1	1	1	1	1	1	1	1	1	0.5	1	1	0.5	1	1	1	1	1	1	1	1	1	0.5	0	1	0.5	1	0.5	1	0.5	1	0.5	1	1	1	1	1	1
Chr9_14	G	0	0	0	0.5	0	0	0	0	1	0.5	0.5	0	0	0	0	0	0	0	0	0	0	0	0	0	0	1	0	0	0	0	0	0	0	0	1	1	0	0	0	0	0	1	0	0	0	0	0.5	0
Chr9_14	T	1	1	1	0.5	1	1	1	1	0	0.5	0.5	1	1	1	1	1	1	1	1	1	1	1	1	1	1	0	1	1	1	1	1	1	1	1	0	0	1	1	1	1	1	0	1	1	1	1	0.5	1
Chr9_2	A	1	0.5	0.5	0.5	1	0.5	1	0	1	1	1	0	1	1	0	0.5	0.5	0	1	1	1	1	0.5	0	0	0	1	1	1	0	1	1	1	0	1	0.5	1	1	1	1	0	0	0	1	0.5	1	0	1
Chr9_2	G	0	0.5	0.5	0.5	0	0.5	0	1	0	0	0	1	0	0	1	0.5	0.5	1	0	0	0	0	0.5	1	1	1	0	0	0	1	0	0	0	1	0	0.5	0	0	0	0	1	1	1	0	0.5	0	1	0
Chr9_22	C	0	0	0	0.5	1	1	0	1	1	0.5	0.5	1	0	1	0	0	1	0	1	0	0	0	0.5	0	1	1	1	1	1	0.5	0	1	0	0	1	1	1	1	1	1	0	1	0.5	1	1	1	0.5	1
Chr9_22	T	1	1	1	0.5	0	0	1	0	0	0.5	0.5	0	1	0	1	0	0	1	0	1	1	1	0.5	1	0	0	0	0	0	0.5	1	0	1	0	0	0	0	0	0	0	1	0	0.5	0	0	0	0.5	0
Chr9_24	C	1	1	1	0.5	1	1	1	0	1	0.5	0.5	0	0.5	1	1	0	1	1	1	1	1	1	1	1	1	0	1	1	0	0.5	1	1	1	1	0	1	1	1	1	0.5	0	0	1	0	0.5	0.5	1	1
Chr9_24	T	0	0	0	0.5	0	0	0	1	0	0.5	0.5	1	0.5	0	0	0	0	0	0	0	0	0	0	0	0	1	0	0	1	0.5	0	0	0	0	1	0	0	0	0	0.5	1	1	0	1	0.5	0.5	0	0
[truncated: 308 more columns]
