# Supplementary material for: Construction of SNP fingerprints and genetic diversity analysis of radish (Raphanus sativus L.)
Source: Front Plant Sci. 2024 Feb 2;15:1329890. doi: 10.3389/fpls.2024.1329890 (PMC10869463; doi:10.3389/fpls.2024.1329890)
Supplement: Supplementary Table 5 — Genetic similarity coefficient matrix of 356 radish materials based on Nei1972. [file Table_5.xlsx]

## Sheet: Sheet1
Supplementary Table 5 Genetic similarity coefficient matrix of 356 radish materials based on Nei1972
	Rs001	Rs002	Rs003	Rs004	Rs005	Rs006	Rs007	Rs008	Rs009	Rs010	Rs011	Rs012	Rs013	Rs014	Rs015	Rs016	Rs017	Rs018	Rs019	Rs020	Rs021	Rs022	Rs023	Rs024	Rs025	Rs026	Rs027	Rs028	Rs029	Rs030	Rs031	Rs032	Rs033	Rs034	Rs035	Rs036	Rs037	Rs038	Rs039	Rs040	Rs041	Rs042	Rs043	Rs044	Rs045	Rs046	Rs047	Rs048	Rs049
Rs001	0	0.412909	0.402498	0.441293	0.608774	0.35754	0.276857	0.509574	0.421994	0.326146	0.338699	0.693008	0.306196	0.638627	0.85224	0.383862	0.606102	0.457064	0.344346	0.489418	0.535221	0.389809	0.369582	0.559616	0.725807	0.579786	0.437437	0.438125	0.255803	0.349009	0.405432	0.239135	0.221892	0.494581	0.373934	0.641247	0.357804	0.372666	0.455178	0.251641	0.35754	0.491691	0.571656	0.489418	0.367834	0.218548	0.40656	0.436271	0.323908
Rs002	0.412909	0	0.218051	0.371776	0.482871	0.339724	0.257017	0.496399	0.550602	0.485471	0.375315	0.617457	0.213424	0.538441	0.458072	0.261624	0.692552	0.260152	0.526144	0.235511	0.363822	0.19764	0.328236	0.209969	0.324458	0.456203	0.420784	0.53031	0.53031	0.381958	0.387364	0.331321	0.414161	0.423649	0.538441	0.599901	0.387364	0.284801	0.493875	0.346871	0.339724	0.44893	0.559298	0.396779	0.377781	0.422324	0.26256	0.316964	0.234934
Rs003	0.402498	0.218051	0	0.393205	0.32039	0.352785	0.199781	0.378431	0.574847	0.344381	0.286942	0.48803	0.201063	0.394498	0.449742	0.174353	0.359232	0.0895668	0.245292	0.336357	0.191517	0.336264	0.192423	0.114816	0.386367	0.656862	0.336264	0.494581	0.494581	0.123343	0.301519	0.395675	0.327138	0.256542	0.502711	0.532423	0.254999	0.319689	0.430746	0.469365	0.257475	0.621597	0.336357	0.336357	0.316076	0.386595	0.276841	0.332528	0.376886
Rs004	0.441293	0.371776	0.393205	0	0.46228	0.416898	0.316949	0.480864	0.332171	0.408494	0.415349	0.253221	0.245122	0.405122	0.437482	0.303995	0.435132	0.45449	0.449167	0.342925	0.445886	0.340954	0.223088	0.562654	0.425163	0.377723	0.570528	0.514775	0.291631	0.442519	0.599603	0.437482	0.391251	0.271227	0.325079	0.463004	0.289008	0.326256	0.416898	0.291734	0.416898	0.366985	0.45415	0.316949	0.444484	0.466708	0.344623	0.374335	0.425251
Rs005	0.608774	0.482871	0.32039	0.46228	0	0.473153	0.535485	0.619357	0.439048	0.491418	0.43606	0.718645	0.323907	0.342945	0.546988	0.297354	0.456758	0.4214	0.314367	0.455442	0.397167	0.454129	0.237968	0.524217	0.455442	0.725937	0.405339	0.508086	0.563656	0.231226	0.622497	0.438774	0.501574	0.545157	0.389465	1.0715	0.282098	0.295673	0.397167	0.628053	0.645004	0.883733	0.653268	0.268857	0.522353	0.573453	0.425958	0.254999	0.26828
Rs006	0.35754	0.339724	0.352785	0.416898	0.473153	0	0.341409	0.45778	0.422097	0.790104	0.419665	0.513642	0.389194	0.527221	0.790104	0.305126	0.413832	0.549632	0.388944	0.465023	0.510826	0.489028	0.399254	0.563392	0.41373	0.473153	0.489028	0.389037	0.465023	0.286648	0.404909	0.235793	0.379818	0.287044	0.42186	0.718634	0.309599	0.173918	0.693147	0.363822	0.456758	0.466476	0.341409	0.439048	0.271118	0.333915	0.466722	0.359232	0.349523
Rs007	0.276857	0.257017	0.199781	0.316949	0.535485	0.341409	0	0.521615	0.405326	0.456619	0.322569	0.388658	0.1689	0.455442	0.456619	0.239868	0.530593	0.286245	0.373678	0.326684	0.273968	0.284731	0.277465	0.298363	0.421994	0.430125	0.421306	0.397302	0.527355	0.238561	0.295673	0.333006	0.248321	0.319689	0.405432	0.532743	0.295673	0.333006	0.547261	0.278996	0.31842	0.530593	0.397302	0.421994	0.279383	0.293389	0.287775	0.367497	0.410432
Rs008	0.509574	0.496399	0.378431	0.480864	0.619357	0.45778	0.521615	0	0.532743	0.396733	0.263965	0.467926	0.280401	0.501574	0.692999	0.33024	0.387277	0.360236	0.387395	0.466045	0.667501	0.545619	0.430766	0.509574	0.439376	0.558732	0.339767	0.413401	0.439376	0.338179	0.338573	0.371415	0.37949	0.471798	0.474175	0.591205	0.570726	0.449376	0.379818	0.525387	0.355126	0.422262	0.315762	0.292773	0.156524	0.259478	0.470928	0.629852	0.490931
Rs009	0.421994	0.550602	0.574847	0.332171	0.439048	0.422097	0.405326	0.532743	0	0.493444	0.302158	0.533934	0.386752	0.170784	0.611227	0.346208	0.572483	0.538946	0.455442	0.430644	0.474741	0.312342	0.266939	0.778669	0.356536	0.252462	0.685017	0.567845	0.430644	0.492642	0.589433	0.388083	0.345531	0.548655	0.304211	0.457064	0.475023	0.413401	0.53031	0.550602	0.762001	0.572483	0.567845	0.341409	0.383764	0.297876	0.316949	0.400531	0.400531
Rs010	0.326146	0.485471	0.344381	0.408494	0.491418	0.790104	0.456619	0.396733	0.493444	0	0.166139	0.533934	0.255663	0.518817	0.551177	0.263965	0.439808	0.34311	0.311548	0.405326	0.422379	0.311548	0.2367	0.421457	0.567845	0.668349	0.35701	0.62847	0.265564	0.41586	0.529745	0.388658	0.476775	0.498353	0.388764	0.458916	0.51027	0.439951	0.2573	0.513642	0.348271	0.57219	0.597698	0.223005	0.412997	0.300819	0.271107	0.350829	0.291109
Rs011	0.338699	0.375315	0.286942	0.415349	0.43606	0.419665	0.322569	0.263965	0.302158	0.166139	0	0.508633	0.222645	0.306007	0.560793	0.280694	0.382165	0.365398	0.297783	0.347887	0.447836	0.346574	0.202733	0.472231	0.514941	0.523071	0.297783	0.545713	0.373862	0.324423	0.345916	0.357194	0.288658	0.474666	0.306007	0.433318	0.51297	0.305901	0.241984	0.459872	0.339622	0.466722	0.347887	0.227259	0.277596	0.242754	0.318403	0.320715	0.311006
Rs012	0.693008	0.617457	0.48803	0.253221	0.718645	0.513642	0.388658	0.467926	0.533934	0.533934	0.508633	0	0.417113	0.502422	0.449376	0.275705	0.440829	0.412997	0.73504	0.745333	0.485471	0.491418	0.426729	0.456619	0.413976	0.324741	0.806499	0.64355	0.316337	0.415566	0.849822	0.692999	0.641238	0.441799	0.530593	0.386329	0.51335	0.563787	0.572483	0.554937	0.380111	0.55524	0.439951	0.439951	0.376804	0.449333	0.467335	0.627484	0.688842
Rs013	0.306196	0.213424	0.201063	0.245122	0.323907	0.389194	0.1689	0.280401	0.386752	0.255663	0.222645	0.417113	0	0.435132	0.380498	0.137631	0.406145	0.220421	0.240218	0.191889	0.280981	0.193698	0.16508	0.280878	0.342172	0.435132	0.240218	0.289528	0.342172	0.266628	0.301681	0.333624	0.280401	0.341356	0.272614	0.64137	0.240218	0.272285	0.389194	0.316079	0.23097	0.521119	0.426729	0.191889	0.242647	0.286813	0.284046	0.269316	0.232746
Rs014	0.638627	0.538441	0.394498	0.405122	0.342945	0.527221	0.455442	0.501574	0.170784	0.518817	0.306007	0.502422	0.435132	0	0.438774	0.430885	0.405465	0.368757	0.505423	0.455442	0.37307	0.358819	0.261498	0.524217	0.381335	0.489548	0.741811	0.563656	0.455442	0.437139	0.584379	0.518817	0.421531	0.458145	0.438255	0.511886	0.473153	0.491418	0.349539	0.597281	0.584379	0.693147	0.455442	0.357804	0.437795	0.483841	0.371891	0.325617	0.532972
Rs015	0.85224	0.458072	0.449742	0.437482	0.546988	0.790104	0.456619	0.692999	0.611227	0.551177	0.560793	0.449376	0.380498	0.438774	0	0.34876	0.51335	0.2931	0.750914	0.310016	0.301751	0.454649	0.419021	0.349136	0.287543	0.605828	0.899334	0.567845	0.660218	0.450951	0.529745	0.819441	0.594558	0.432499	0.966842	0.576699	0.651106	0.819441	0.475023	0.603254	0.422379	0.634711	0.483288	0.62847	0.656619	0.682186	0.271107	0.459043	0.538946
Rs016	0.383862	0.261624	0.174353	0.303995	0.297354	0.305126	0.239868	0.33024	0.346208	0.263965	0.280694	0.275705	0.137631	0.430885	0.34876	0	0.347668	0.167939	0.314304	0.263965	0.184498	0.174542	0.170463	0.257111	0.193348	0.348647	0.419665	0.48103	0.313975	0.136872	0.382303	0.296116	0.357639	0.320715	0.348647	0.520727	0.26256	0.246106	0.47218	0.40433	0.255115	0.547079	0.402714	0.148896	0.248461	0.264335	0.232746	0.308093	0.22805
Rs017	0.606102	0.692552	0.359232	0.435132	0.456758	0.413832	0.530593	0.387277	0.572483	0.439808	0.382165	0.440829	0.406145	0.405465	0.51335	0.347668	0	0.358548	0.282098	0.475023	0.388514	0.584379	0.272614	0.491691	0.475023	0.693147	0.527221	0.589433	0.422379	0.338699	0.439808	0.551033	0.495491	0.479483	0.76214	0.700114	0.37307	0.355126	0.388514	0.5045	0.493875	0.534082	0.372369	0.397062	0.402167	0.392266	0.361328	0.402167	0.476823
Rs018	0.457064	0.260152	0.0895668	0.45449	0.4214	0.549632	0.286245	0.360236	0.538946	0.34311	0.365398	0.412997	0.220421	0.368757	0.2931	0.167939	0.358548	0	0.385152	0.335035	0.208705	0.287513	0.210587	0.070291	0.217252	0.448799	0.437795	0.527407	0.440396	0.174865	0.402167	0.540936	0.433464	0.415174	0.598331	0.473784	0.299513	0.480311	0.460019	0.501314	0.208705	0.594937	0.386329	0.386329	0.34985	0.395711	0.22134	0.385809	0.404696
Rs019	0.344346	0.526144	0.245292	0.449167	0.314367	0.388944	0.373678	0.387395	0.455442	0.311548	0.297783	0.73504	0.240218	0.505423	0.750914	0.314304	0.282098	0.385152	0	0.373678	0.388944	0.521297	0.230852	0.487447	0.523961	0.741811	0.207639	0.471317	0.471317	0.18726	0.438255	0.35701	0.339767	0.36918	0.454129	0.715812	0.215111	0.35701	0.388944	0.420784	0.489028	0.645004	0.421306	0.328216	0.351015	0.317394	0.36179	0.270874	0.331782
Rs020	0.489418	0.235511	0.336357	0.342925	0.455442	0.465023	0.326684	0.466045	0.430644	0.405326	0.347887	0.745333	0.191889	0.455442	0.310016	0.263965	0.475023	0.335035	0.373678	0	0.295947	0.243058	0.277465	0.438125	0.282232	0.508086	0.471317	0.584513	0.555526	0.447449	0.210516	0.405326	0.439376	0.5069	0.592644	0.801007	0.341136	0.405326	0.41373	0.396779	0.439048	0.55958	0.473288	0.326684	0.514222	0.420141	0.287775	0.44754	0.33247
Rs021	0.535221	0.363822	0.191517	0.445886	0.397167	0.510826	0.273968	0.667501	0.474741	0.422379	0.447836	0.485471	0.280981	0.37307	0.301751	0.184498	0.388514	0.208705	0.388944	0.295947	0	0.214591	0.269201	0.247539	0.295947	0.527221	0.600253	0.51909	0.547261	0.238561	0.404909	0.55958	0.542337	0.361152	0.584379	0.46732	0.404909	0.502422	0.567984	0.493875	0.405465	0.781557	0.576249	0.41373	0.448799	0.496434	0.27951	0.411876	0.375499
Rs022	0.389809	0.19764	0.336264	0.340954	0.454129	0.489028	0.284731	0.545619	0.312342	0.311548	0.346574	0.491418	0.193698	0.358819	0.454649	0.174542	0.584379	0.287513	0.521297	0.243058	0.214591	0	0.277372	0.389809	0.243058	0.358819	0.632523	0.57953	0.421306	0.492642	0.489548	0.35701	0.490049	0.47454	0.405339	0.52776	0.438255	0.35701	0.489028	0.420784	0.388944	0.709542	0.700891	0.284731	0.401026	0.417477	0.218689	0.317394	0.284154
Rs023	0.369582	0.328236	0.192423	0.223088	0.237968	0.399254	0.277465	0.430766	0.266939	0.2367	0.202733	0.426729	0.16508	0.261498	0.419021	0.170463	0.272614	0.210587	0.230852	0.277465	0.269201	0.277372	0	0.318288	0.302158	0.38825	0.277372	0.525302	0.38012	0.19112	0.451527	0.39085	0.346208	0.336047	0.310288	0.50528	0.240218	0.19018	0.399254	0.439461	0.371855	0.560296	0.464677	0.162396	0.337228	0.300304	0.217949	0.222343	0.290595
Rs024	0.559616	0.209969	0.114816	0.562654	0.524217	0.563392	0.298363	0.509574	0.778669	0.421457	0.472231	0.456619	0.280878	0.524217	0.349136	0.257111	0.491691	0.070291	0.487447	0.438125	0.247539	0.389809	0.318288	0	0.389335	0.579786	0.487447	0.489418	0.543485	0.241327	0.508086	0.583976	0.537745	0.386367	0.701147	0.548873	0.405432	0.526817	0.563392	0.546441	0.226919	0.547261	0.489418	0.489418	0.367834	0.491841	0.279808	0.436271	0.399894
Rs025	0.725807	0.324458	0.386367	0.425163	0.455442	0.41373	0.421994	0.439376	0.356536	0.567845	0.514941	0.413976	0.342172	0.381335	0.287543	0.193348	0.475023	0.217252	0.523961	0.282232	0.295947	0.243058	0.302158	0.389335	0	0.268857	0.523961	0.584513	0.555526	0.392711	0.546988	0.456619	0.675765	0.449742	0.563656	0.475585	0.388764	0.405326	0.668622	0.559298	0.465023	0.651954	0.473288	0.326684	0.377021	0.420141	0.240147	0.342179	0.383764
Rs026	0.579786	0.456203	0.656862	0.377723	0.725937	0.473153	0.430125	0.558732	0.252462	0.668349	0.523071	0.324741	0.435132	0.489548	0.605828	0.348647	0.693147	0.448799	0.741811	0.508086	0.527221	0.358819	0.38825	0.579786	0.268857	0	0.741811	0.685017	0.508086	0.546339	0.778535	0.668349	0.619357	0.674368	0.389465	0.456316	0.527221	0.491418	0.852643	0.404909	0.447178	0.405465	0.685017	0.455442	0.385152	0.375627	0.345916	0.542681	0.391894
Rs027	0.437437	0.420784	0.336264	0.570528	0.405339	0.489028	0.421306	0.339767	0.685017	0.35701	0.297783	0.806499	0.240218	0.741811	0.899334	0.419665	0.527221	0.437795	0.207639	0.471317	0.600253	0.632523	0.277372	0.487447	0.523961	0.741811	0	0.471317	0.57953	0.35911	0.438255	0.404638	0.490049	0.531699	0.358819	0.715812	0.342945	0.311548	0.437734	0.526144	0.489028	0.778535	0.523961	0.328216	0.351015	0.366184	0.591364	0.366184	0.331782
Rs028	0.438125	0.53031	0.494581	0.514775	0.508086	0.389037	0.397302	0.413401	0.567845	0.62847	0.545713	0.64355	0.289528	0.563656	0.567845	0.48103	0.589433	0.527407	0.471317	0.584513	0.51909	0.57953	0.525302	0.489418	0.584513	0.685017	0.471317	0	0.473288	0.426613	0.546988	0.430644	0.466045	0.369699	0.508086	0.726899	0.491418	0.405326	0.576249	0.324458	0.491691	0.372369	0.527355	0.584513	0.190435	0.367497	0.50484	0.393473	0.33247
Rs029	0.255803	0.53031	0.494581	0.291631	0.563656	0.465023	0.527355	0.439376	0.430644	0.265564	0.373862	0.316337	0.342172	0.455442	0.660218	0.313975	0.422379	0.440396	0.471317	0.555526	0.547261	0.421306	0.38012	0.543485	0.555526	0.508086	0.57953	0.473288	0	0.437139	0.668349	0.405326	0.580455	0.567525	0.334814	0.593368	0.295673	0.430644	0.341409	0.324458	0.341409	0.422379	0.527355	0.326684	0.457064	0.317487	0.474987	0.420141	0.307778
Rs030	0.349009	0.381958	0.123343	0.442519	0.231226	0.286648	0.238561	0.338179	0.492642	0.41586	0.324423	0.415566	0.266628	0.437139	0.450951	0.136872	0.338699	0.174865	0.18726	0.447449	0.238561	0.492642	0.19112	0.241327	0.392711	0.546339	0.35911	0.426613	0.437139	0	0.423649	0.349168	0.381958	0.324423	0.423649	0.613941	0.241327	0.31742	0.585559	0.476329	0.328173	0.472231	0.297401	0.278075	0.259885	0.312077	0.226607	0.393416	0.358325
Rs031	0.405432	0.387364	0.301519	0.599603	0.622497	0.404909	0.295673	0.338573	0.589433	0.529745	0.345916	0.849822	0.301681	0.584379	0.529745	0.382303	0.439808	0.402167	0.438255	0.210516	0.404909	0.489548	0.451527	0.508086	0.546988	0.778535	0.438255	0.546988	0.668349	0.423649	0	0.323893	0.338573	0.598331	0.709542	0.829837	0.456758	0.474175	0.388764	0.438657	0.51027	0.709542	0.341136	0.546988	0.45567	0.315908	0.433293	0.618381	0.43606
Rs032	0.239135	0.331321	0.395675	0.437482	0.438774	0.235793	0.333006	0.371415	0.388083	0.388658	0.357194	0.692999	0.333624	0.518817	0.819441	0.296116	0.551033	0.540936	0.35701	0.405326	0.55958	0.35701	0.39085	0.583976	0.456619	0.668349	0.404638	0.430644	0.405326	0.349168	0.323893	0	0.346722	0.4051	0.388764	0.576699	0.356119	0.206336	0.530593	0.431404	0.620205	0.51335	0.456619	0.265564	0.262715	0.185749	0.295799	0.325511	0.291109
Rs033	0.221892	0.414161	0.327138	0.391251	0.501574	0.379818	0.248321	0.37949	0.345531	0.476775	0.288658	0.641238	0.280401	0.421531	0.594558	0.357639	0.495491	0.433464	0.339767	0.439376	0.542337	0.490049	0.346208	0.537745	0.675765	0.619357	0.490049	0.466045	0.580455	0.381958	0.338573	0.346722	0	0.334597	0.558732	0.623995	0.511886	0.422708	0.355126	0.314078	0.405136	0.5045	0.388083	0.493444	0.269002	0.259478	0.441075	0.441799	0.461078
Rs034	0.494581	0.423649	0.256542	0.271227	0.545157	0.287044	0.319689	0.471798	0.548655	0.498353	0.474666	0.441799	0.341356	0.458145	0.432499	0.320715	0.479483	0.415174	0.36918	0.5069	0.361152	0.47454	0.336047	0.386367	0.449742	0.674368	0.531699	0.369699	0.567525	0.324423	0.598331	0.4051	0.334597	0	0.486316	0.48313	0.496434	0.432499	0.528206	0.423649	0.311141	0.51886	0.303995	0.477913	0.296843	0.549306	0.374744	0.339586	0.506415
Rs035	0.373934	0.538441	0.502711	0.325079	0.389465	0.42186	0.405432	0.474175	0.304211	0.388764	0.306007	0.530593	0.272614	0.438255	0.966842	0.348647	0.76214	0.598331	0.454129	0.592644	0.584379	0.405339	0.310288	0.701147	0.563656	0.389465	0.358819	0.508086	0.334814	0.423649	0.709542	0.388764	0.558732	0.486316	0	0.699938	0.32655	0.364666	0.584379	0.482871	0.397167	0.693147	0.751708	0.247803	0.437795	0.512829	0.60828	0.401603	0.340601
Rs036	0.641247	0.599901	0.532423	0.463004	1.0715	0.718634	0.532743	0.591205	0.457064	0.458916	0.433318	0.386329	0.64137	0.511886	0.576699	0.520727	0.700114	0.473784	0.715812	0.801007	0.46732	0.52776	0.50528	0.548873	0.475585	0.456316	0.715812	0.726899	0.593368	0.613941	0.829837	0.576699	0.623995	0.48313	0.699938	0	0.829837	0.710231	0.683543	0.632691	0.683543	0.566582	0.562596	0.657906	0.433464	0.39577	0.366058	0.578091	0.711483
Rs037	0.357804	0.387364	0.254999	0.289008	0.282098	0.309599	0.295673	0.570726	0.475023	0.51027	0.51297	0.51335	0.240218	0.473153	0.651106	0.26256	0.37307	0.299513	0.215111	0.341136	0.404909	0.438255	0.240218	0.405432	0.388764	0.527221	0.342945	0.491418	0.295673	0.241327	0.456758	0.356119	0.511886	0.496434	0.32655	0.829837	0	0.27843	0.51027	0.292053	0.404909	0.676196	0.491418	0.341136	0.532972	0.43606	0.433293	0.26828	0.330699
Rs038	0.372666	0.284801	0.319689	0.326256	0.295673	0.173918	0.333006	0.449376	0.413401	0.439951	0.305901	0.563787	0.272285	0.491418	0.819441	0.246106	0.355126	0.480311	0.35701	0.405326	0.502422	0.35701	0.19018	0.526817	0.405326	0.491418	0.311548	0.405326	0.430644	0.31742	0.474175	0.206336	0.422708	0.432499	0.364666	0.710231	0.27843	0	0.589433	0.380111	0.530593	0.431112	0.567845	0.182183	0.239725	0.25319	0.347093	0.230201	0.243481
Rs039	0.455178	0.493875	0.430746	0.416898	0.397167	0.693147	0.547261	0.379818	0.53031	0.2573	0.241984	0.572483	0.389194	0.349539	0.475023	0.47218	0.388514	0.460019	0.388944	0.41373	0.567984	0.489028	0.399254	0.563392	0.668622	0.852643	0.437734	0.576249	0.341409	0.585559	0.388764	0.530593	0.355126	0.528206	0.584379	0.683543	0.51027	0.589433	0	0.363822	0.430783	0.589433	0.389037	0.491691	0.535811	0.467446	0.466722	0.385208	0.349523
Rs040	0.251641	0.346871	0.469365	0.291734	0.628053	0.363822	0.278996	0.525387	0.550602	0.513642	0.459872	0.554937	0.316079	0.597281	0.603254	0.40433	0.5045	0.501314	0.420784	0.396779	0.493875	0.420784	0.439461	0.546441	0.559298	0.404909	0.526144	0.324458	0.324458	0.476329	0.438657	0.431404	0.314078	0.423649	0.482871	0.632691	0.292053	0.380111	0.363822	0	0.293204	0.253186	0.53031	0.589151	0.377781	0.342282	0.420784	0.316964	0.234934
Rs041	0.35754	0.339724	0.257475	0.416898	0.645004	0.456758	0.31842	0.355126	0.762001	0.348271	0.339622	0.380111	0.23097	0.584379	0.422379	0.255115	0.493875	0.208705	0.489028	0.439048	0.405465	0.388944	0.371855	0.226919	0.465023	0.447178	0.489028	0.491691	0.341409	0.328173	0.51027	0.620205	0.405136	0.311141	0.397167	0.683543	0.404909	0.530593	0.430783	0.293204	0	0.439808	0.439048	0.41373	0.368757	0.526287	0.437734	0.439275	0.402167
Rs042	0.491691	0.44893	0.621597	0.366985	0.883733	0.466476	0.530593	0.422262	0.572483	0.57219	0.466722	0.55524	0.521119	0.693147	0.634711	0.547079	0.534082	0.594937	0.645004	0.55958	0.781557	0.709542	0.560296	0.547261	0.651954	0.405465	0.778535	0.372369	0.422379	0.472231	0.709542	0.51335	0.5045	0.51886	0.693147	0.566582	0.676196	0.431112	0.589433	0.253186	0.439808	0	0.475023	0.55958	0.285125	0.349523	0.33466	0.569197	0.365598
Rs043	0.571656	0.559298	0.336357	0.45415	0.653268	0.341409	0.397302	0.315762	0.567845	0.597698	0.347887	0.439951	0.426729	0.455442	0.483288	0.402714	0.372369	0.386329	0.421306	0.473288	0.576249	0.700891	0.464677	0.489418	0.473288	0.685017	0.523961	0.527355	0.527355	0.297401	0.341136	0.456619	0.388083	0.303995	0.751708	0.562596	0.491418	0.567845	0.389037	0.53031	0.439048	0.475023	0	0.584513	0.351703	0.420141	0.445999	0.565323	0.620152
Rs044	0.489418	0.396779	0.336357	0.316949	0.268857	0.439048	0.421994	0.292773	0.341409	0.223005	0.227259	0.439951	0.191889	0.357804	0.62847	0.148896	0.397062	0.386329	0.328216	0.326684	0.41373	0.284731	0.162396	0.489418	0.326684	0.455442	0.328216	0.584513	0.326684	0.278075	0.546988	0.265564	0.493444	0.477913	0.247803	0.657906	0.341136	0.182183	0.491691	0.589151	0.41373	0.55958	0.584513	0	0.279383	0.293389	0.337785	0.342179	0.307778
Rs045	0.367834	0.377781	0.316076	0.444484	0.522353	0.271118	0.279383	0.156524	0.383764	0.412997	0.277596	0.376804	0.242647	0.437795	0.656619	0.248461	0.402167	0.34985	0.351015	0.514222	0.448799	0.401026	0.337228	0.367834	0.377021	0.385152	0.351015	0.190435	0.457064	0.259885	0.45567	0.262715	0.269002	0.296843	0.437795	0.433464	0.532972	0.239725	0.535811	0.377781	0.368757	0.285125	0.351703	0.279383	0	0.132126	0.320138	0.40542	0.340141
Rs046	0.218548	0.422324	0.386595	0.466708	0.573453	0.333915	0.293389	0.259478	0.297876	0.300819	0.242754	0.449333	0.286813	0.483841	0.682186	0.264335	0.392266	0.395711	0.317394	0.420141	0.496434	0.417477	0.300304	0.491841	0.420141	0.375627	0.366184	0.367497	0.317487	0.312077	0.315908	0.185749	0.259478	0.549306	0.512829	0.39577	0.43606	0.25319	0.467446	0.342282	0.526287	0.349523	0.420141	0.293389	0.132126	0	0.25797	0.395896	0.277973
Rs047	0.40656	0.26256	0.276841	0.344623	0.425958	0.466722	0.287775	0.470928	0.316949	0.271107	0.318403	0.467335	0.284046	0.371891	0.271107	0.232746	0.361328	0.22134	0.36179	0.287775	0.27951	0.218689	0.217949	0.279808	0.240147	0.345916	0.591364	0.50484	0.474987	0.226607	0.433293	0.295799	0.441075	0.374744	0.60828	0.366058	0.433293	0.347093	0.466722	0.420784	0.437734	0.33466	0.445999	0.337785	0.320138	0.25797	0	0.232653	0.248261
Rs048	0.436271	0.316964	0.332528	0.374335	0.254999	0.359232	0.367497	0.629852	0.400531	0.350829	0.320715	0.627484	0.269316	0.325617	0.459043	0.308093	0.402167	0.385809	0.270874	0.44754	0.411876	0.317394	0.222343	0.436271	0.342179	0.542681	0.366184	0.393473	0.420141	0.393416	0.618381	0.325511	0.441799	0.339586	0.401603	0.578091	0.26828	0.230201	0.385208	0.316964	0.439275	0.569197	0.565323	0.342179	0.40542	0.395896	0.232653	0	0.180335
Rs049	0.323908	0.234934	0.376886	0.425251	0.26828	0.349523	0.410432	0.490931	0.400531	0.291109	0.311006	0.688842	0.232746	0.532972	0.538946	0.22805	0.476823	0.404696	0.331782	0.33247	0.375499	0.284154	0.290595	0.399894	0.383764	0.391894	0.331782	0.33247	0.307778	0.358325	0.43606	0.291109	0.461078	0.506415	0.340601	0.711483	0.330699	0.243481	0.349523	0.234934	0.402167	0.365598	0.620152	0.307778	0.340141	0.277973	0.248261	0.180335	0
Rs050	0.574847	0.471461	0.34985	0.465479	0.294649	0.40445	0.310343	0.351226	0.459043	0.51886	0.375708	0.586241	0.26188	0.394732	0.605474	0.395313	0.368757	0.405465	0.287513	0.335035	0.40445	0.385152	0.315948	0.574847	0.310343	0.566582	0.242051	0.468567	0.656619	0.41723	0.285125	0.326488	0.492305	0.475799	0.394732	0.712195	0.335141	0.369085	0.40445	0.532086	0.61417	0.914801	0.386329	0.360353	0.36754	0.385809	0.383859	0.340141	0.385809
Rs051	0.389335	0.301469	0.221288	0.342925	0.312342	0.252462	0.373204	0.493444	0.456619	0.567845	0.4561	0.551177	0.26421	0.455442	0.836109	0.313975	0.397062	0.360353	0.203053	0.499956	0.439048	0.471317	0.277465	0.389335	0.499956	0.563656	0.284731	0.527355	0.397302	0.267548	0.546988	0.405326	0.36339	0.395675	0.357804	0.691808	0.132044	0.287543	0.491691	0.372086	0.439048	0.753736	0.584513	0.397302	0.429665	0.44754	0.535611	0.269859	0.33247
Rs052	0.490871	0.299243	0.335834	0.428935	0.482871	0.439808	0.278996	0.468228	0.512765	0.572483	0.348647	0.617457	0.189327	0.456203	0.284801	0.366985	0.422262	0.360236	0.420784	0.257017	0.413832	0.472077	0.410474	0.340589	0.53031	0.628053	0.526144	0.301469	0.53031	0.359921	0.323893	0.54263	0.290547	0.45182	0.761584	0.775792	0.438657	0.513642	0.363822	0.322773	0.388514	0.379818	0.257017	0.559298	0.377781	0.422324	0.365214	0.422324	0.332573
Rs053	0.455507	0.338175	0.231828	0.283038	0.193273	0.284508	0.339293	0.546544	0.345531	0.476775	0.366619	0.458916	0.263435	0.347423	0.659097	0.252278	0.370969	0.325251	0.209147	0.439376	0.431112	0.437406	0.150464	0.379521	0.388083	0.501574	0.339767	0.439376	0.413401	0.227807	0.699938	0.371415	0.37949	0.41464	0.396213	0.657896	0.16422	0.148271	0.542337	0.440829	0.542337	0.524478	0.550602	0.248321	0.317792	0.333586	0.356518	0.190485	0.323877
Rs054	0.437437	0.420784	0.436347	0.340954	0.358819	0.214591	0.373678	0.437406	0.268857	0.621703	0.346574	0.491418	0.340302	0.358819	0.621703	0.265514	0.42186	0.614726	0.330242	0.373678	0.437734	0.470004	0.377456	0.717022	0.421306	0.454129	0.521297	0.638371	0.373678	0.241327	0.438255	0.311548	0.339767	0.420473	0.358819	0.787271	0.342945	0.35701	0.489028	0.420784	0.543095	0.527221	0.373678	0.284731	0.401026	0.366184	0.470004	0.417477	0.331782
Rs055	0.489418	0.396779	0.46641	0.45415	0.268857	0.465023	0.584513	0.550602	0.62847	0.333006	0.400531	0.899484	0.289528	0.685017	0.62847	0.348647	0.475023	0.558179	0.328216	0.304211	0.491691	0.373678	0.277465	0.600644	0.473288	0.751708	0.328216	0.473288	0.645138	0.535812	0.546988	0.356536	0.466045	0.458145	0.508086	1.01458	0.491418	0.223005	0.439048	0.502139	0.547261	0.620205	0.815037	0.282232	0.402997	0.44754	0.390429	0.269859	0.23716
Rs056	0.342815	0.347989	0.265739	0.514775	0.268857	0.389037	0.304211	0.466045	0.547261	0.265564	0.273779	0.611802	0.21542	0.563656	0.510687	0.263965	0.372369	0.335035	0.243058	0.373204	0.389037	0.373678	0.253368	0.389335	0.421994	0.592644	0.243058	0.326684	0.373204	0.278075	0.388764	0.405326	0.493444	0.5069	0.430125	0.801007	0.295673	0.244058	0.341409	0.347989	0.389037	0.589433	0.584513	0.349674	0.351703	0.293389	0.287775	0.202417	0.150149
Rs057	0.243314	0.380217	0.344487	0.377723	0.543615	0.349539	0.290363	0.396213	0.439048	0.252188	0.281909	0.651954	0.272614	0.661398	0.73504	0.297354	0.356675	0.47697	0.154025	0.290363	0.473153	0.358819	0.285596	0.579786	0.455442	0.630627	0.314367	0.563656	0.405432	0.338699	0.32655	0.17051	0.347423	0.430746	0.543615	0.540873	0.32655	0.273695	0.42186	0.332589	0.555391	0.483427	0.455442	0.312342	0.335141	0.167988	0.225288	0.325617	0.29181
Rs058	0.35754	0.227246	0.213023	0.361328	0.304077	0.380772	0.389037	0.431112	0.422097	0.348271	0.289612	0.572483	0.191889	0.37307	0.651954	0.255115	0.530593	0.277698	0.437734	0.41373	0.430783	0.297972	0.198583	0.312077	0.491691	0.584379	0.297972	0.491691	0.341409	0.403238	0.491418	0.448355	0.355126	0.413796	0.282098	0.792742	0.341136	0.2573	0.380772	0.522046	0.310155	0.790104	0.606102	0.273968	0.394732	0.467446	0.527347	0.333915	0.299513
Rs059	0.206566	0.186726	0.172975	0.326701	0.465194	0.318746	0.148763	0.423153	0.420141	0.335035	0.252278	0.570694	0.191354	0.465194	0.589927	0.318403	0.457737	0.287497	0.257925	0.302913	0.368757	0.351015	0.257185	0.272524	0.514222	0.522353	0.303387	0.457064	0.429665	0.216767	0.315908	0.217252	0.245471	0.376886	0.411127	0.462452	0.26828	0.239725	0.47697	0.351806	0.343439	0.375499	0.429665	0.302913	0.281412	0.247196	0.242177	0.323182	0.340141
Rs060	0.356536	0.387883	0.386329	0.239517	0.279279	0.405429	0.388658	0.576699	0.276105	0.276105	0.373761	0.487703	0.235977	0.502422	0.659097	0.155077	0.414161	0.38623	0.341136	0.388658	0.458072	0.295673	0.202642	0.510687	0.363965	0.372369	0.388764	0.551177	0.248896	0.359921	0.57219	0.322625	0.516075	0.56316	0.235793	0.665965	0.136872	0.210147	0.458072	0.362565	0.485471	0.55524	0.611802	0.22739	0.48803	0.367095	0.326256	0.267012	0.188118
Rs061	0.613193	0.386595	0.218061	0.546749	0.342282	0.37738	0.50064	0.55957	0.48103	0.38623	0.273636	0.592382	0.401981	0.368257	0.482781	0.277155	0.292271	0.264335	0.285125	0.441799	0.250628	0.439275	0.204155	0.276721	0.38623	0.509336	0.439275	0.531412	0.50064	0.247539	0.520497	0.554311	0.593472	0.415515	0.604646	0.445027	0.385208	0.315727	0.404779	0.443753	0.404779	0.442327	0.38623	0.38623	0.395171	0.414715	0.252356	0.232653	0.25797
Rs062	0.47275	0.262328	0.344381	0.467335	0.341136	0.502422	0.430644	0.594558	0.580455	0.439951	0.560793	0.659097	0.174646	0.73504	0.494019	0.198478	0.634711	0.2931	0.454649	0.333006	0.324741	0.311548	0.28549	0.326146	0.287543	0.491418	0.268063	0.483288	0.510687	0.392711	0.529745	0.413976	0.563787	0.550282	0.46475	0.710231	0.323893	0.339868	0.718645	0.572483	0.475023	0.849822	0.693008	0.310016	0.440396	0.430872	0.429331	0.376804	0.243481
Rs063	0.38726	0.284198	0.272347	0.338708	0.38726	0.223025	0.340413	0.312369	0.623414	0.4526	0.290808	0.452783	0.246334	0.470783	0.380733	0.275658	0.408263	0.359921	0.45658	0.349423	0.390079	0.45658	0.338708	0.38726	0.430026	0.608934	0.395956	0.2322	0.321252	0.221892	0.338797	0.331239	0.476043	0.340104	0.417113	0.619129	0.338797	0.223025	0.399254	0.284198	0.249001	0.293853	0.284843	0.312242	0.272347	0.383181	0.382992	0.320661	0.290808
Rs064	0.778132	0.513642	0.536753	0.467335	0.388764	0.684744	0.567845	0.533934	0.611227	0.58103	0.529044	0.563787	0.352327	0.605828	0.413976	0.525691	0.51335	0.510164	0.454649	0.456619	0.684744	0.750914	0.508633	0.526817	0.567845	0.605828	0.404638	0.405326	0.597698	0.605102	0.529745	0.745333	0.476775	0.648722	0.806499	0.784339	0.474175	0.611802	0.279279	0.458072	0.651954	0.542337	0.405326	0.660218	0.497554	0.48803	0.518943	0.430872	0.34112
Rs065	0.428473	0.218051	0.251314	0.364218	0.296859	0.404078	0.288729	0.432499	0.475711	0.344381	0.261624	0.580403	0.128742	0.47454	0.272061	0.223144	0.359232	0.271888	0.289744	0.199781	0.352785	0.289744	0.241213	0.32839	0.36105	0.531699	0.385054	0.36105	0.46641	0.241162	0.35031	0.477913	0.378431	0.414766	0.592323	0.820105	0.35031	0.319689	0.328092	0.361152	0.352785	0.439275	0.36105	0.386367	0.36872	0.386595	0.202733	0.232444	0.199205
Rs066	0.175988	0.292271	0.306552	0.374335	0.573453	0.385208	0.342179	0.470787	0.427929	0.25319	0.268072	0.593583	0.314984	0.375627	0.459043	0.308093	0.476823	0.303571	0.528703	0.293389	0.359232	0.226422	0.300304	0.409603	0.44754	0.542681	0.589327	0.504698	0.269859	0.530559	0.315908	0.276721	0.308268	0.395155	0.483841	0.452928	0.43606	0.325511	0.333915	0.292271	0.261594	0.486725	0.504698	0.367497	0.40542	0.287682	0.283946	0.340326	0.330617
Rs067	0.437648	0.345009	0.334597	0.40238	0.456316	0.222197	0.395542	0.469844	0.439011	0.641238	0.376159	0.527407	0.288549	0.456316	0.487087	0.303571	0.598331	0.359374	0.47219	0.321434	0.413253	0.419546	0.383919	0.464316	0.321434	0.511886	0.52776	0.345531	0.345531	0.393634	0.385152	0.431517	0.469844	0.462624	0.429648	0.711496	0.287513	0.353556	0.524478	0.345009	0.361959	0.505958	0.395542	0.448186	0.405294	0.39577	0.51559	0.368371	0.331993
Rs068	0.641238	0.387241	0.376159	0.637665	0.864381	0.489982	0.498832	0.284587	0.748575	0.711496	0.527543	0.501651	0.40001	0.701684	0.451985	0.335639	0.674467	0.261624	0.915345	0.469844	0.519835	0.495491	0.574793	0.353556	0.336313	0.47854	0.755002	0.498832	0.623995	0.517659	0.337267	0.573346	0.501651	0.618854	0.815012	0.637375	0.719531	0.573346	0.729355	0.541597	0.327463	0.507528	0.498832	0.599901	0.331993	0.376159	0.473011	0.720391	0.53807
Rs069	0.6446	0.431404	0.344381	0.274963	0.295673	0.502422	0.456619	0.396733	0.324458	0.270875	0.257111	0.346722	0.29826	0.295673	0.46662	0.198478	0.331028	0.317792	0.507292	0.405326	0.475023	0.311548	0.213169	0.421457	0.333006	0.438774	0.507292	0.693008	0.405326	0.41586	0.588585	0.413976	0.504946	0.46067	0.318146	0.545928	0.371521	0.293348	0.348271	0.635003	0.397062	0.57219	0.456619	0.16238	0.412997	0.48803	0.321117	0.376804	0.393764
Rs070	0.479573	0.575428	0.402498	0.33308	0.446255	0.405168	0.365804	0.355423	0.421994	0.583976	0.561843	0.456619	0.35884	0.471573	0.526817	0.331219	0.295947	0.351703	0.344346	0.489418	0.42986	0.487447	0.318288	0.559616	0.298363	0.373934	0.437437	0.342815	0.489418	0.349009	0.455442	0.526817	0.404214	0.336357	0.579786	0.707938	0.357804	0.372666	0.455178	0.295126	0.455178	0.439048	0.320342	0.489418	0.272524	0.35831	0.353916	0.383628	0.373919
Rs071	0.6446	0.380111	0.422343	0.467335	0.388764	0.620205	0.380634	0.563787	0.493444	0.439951	0.439432	0.504946	0.409486	0.518817	0.248896	0.322092	0.542337	0.369085	0.621703	0.356536	0.397062	0.404638	0.477862	0.372666	0.380634	0.46475	0.750914	0.456619	0.62847	0.40487	0.474175	0.494019	0.476775	0.550282	0.73504	0.545928	0.588585	0.522189	0.372369	0.405429	0.475023	0.331028	0.510687	0.483288	0.412997	0.430872	0.200489	0.459043	0.291109
Rs072	0.347093	0.329484	0.117732	0.341497	0.26256	0.412088	0.229766	0.404696	0.430766	0.245014	0.233398	0.432233	0.160362	0.365214	0.394229	0.12536	0.338545	0.192206	0.231882	0.278556	0.087385	0.18642	0.149126	0.271107	0.32985	0.608836	0.329521	0.470928	0.441075	0.204718	0.344377	0.375067	0.320138	0.280069	0.365214	0.487545	0.329521	0.311991	0.375067	0.474666	0.269707	0.759696	0.441075	0.206236	0.318403	0.385003	0.304883	0.346574	0.35515
Rs073	0.718363	0.6417	0.422324	0.532355	0.339724	0.693147	0.485471	0.599901	0.496097	0.338175	0.328236	0.675755	0.408263	0.466476	0.388185	0.374744	0.258708	0.43209	0.456203	0.355418	0.371564	0.567428	0.291734	0.53031	0.458072	0.580886	0.456203	0.701694	0.603254	0.369239	0.370969	0.55524	0.666592	0.730201	0.611658	0.623516	0.476329	0.440829	0.422857	0.6417	0.659246	0.6417	0.513642	0.355418	0.594937	0.430885	0.30226	0.469774	0.338545
Rs074	0.605281	0.396881	0.361152	0.489559	0.567428	0.466476	0.422097	0.362868	0.404551	0.485471	0.348647	0.413858	0.400636	0.404909	0.355418	0.189303	0.5045	0.260152	0.583303	0.301469	0.293204	0.325473	0.354904	0.438227	0.193838	0.332589	0.583303	0.589151	0.559298	0.359732	0.387364	0.54263	0.440829	0.51066	0.692591	0.320316	0.549883	0.485471	0.466476	0.422857	0.439808	0.563341	0.372086	0.422097	0.326488	0.316964	0.365214	0.571856	0.440786
Rs075	0.446255	0.597281	0.531699	0.554654	0.693147	0.709542	0.430125	0.421531	0.341409	0.413456	0.381993	0.651954	0.377974	0.600774	0.73504	0.383862	0.567984	0.4214	0.55949	0.622497	0.676752	0.55949	0.361582	0.579786	0.508086	0.438255	0.454129	0.622497	0.685017	0.546339	0.527221	0.388764	0.27843	0.754092	0.600774	0.378354	0.645004	0.438774	0.709542	0.628053	0.709542	0.567984	0.622497	0.405432	0.287513	0.189041	0.398559	0.573453	0.503119
Rs076	0.321434	0.405425	0.290409	0.441262	0.593368	0.507528	0.304766	0.432823	0.536753	0.336313	0.338659	0.423153	0.239655	0.554331	0.528685	0.263927	0.460019	0.213389	0.306034	0.487087	0.42297	0.353662	0.307069	0.321434	0.431517	0.439921	0.403672	0.516075	0.458916	0.31742	0.570726	0.559456	0.352781	0.359374	0.524478	0.523077	0.4214	0.591205	0.431517	0.405425	0.296218	0.616852	0.304766	0.608448	0.341702	0.38606	0.317822	0.376159	0.40433
Rs077	0.491715	0.42297	0.284587	0.345221	0.456316	0.313169	0.297903	0.263992	0.402997	0.545928	0.34876	0.412997	0.344119	0.283044	0.378874	0.284338	0.203677	0.281412	0.369536	0.345531	0.337267	0.419546	0.301681	0.386355	0.345531	0.403672	0.586601	0.370224	0.532743	0.241162	0.287513	0.431517	0.287523	0.290759	0.633247	0.541597	0.385152	0.353556	0.337267	0.249698	0.313169	0.294649	0.230462	0.421517	0.227612	0.341702	0.260697	0.39577	0.414231
Rs078	0.539699	0.335834	0.275412	0.55227	0.394498	0.575928	0.412343	0.432499	0.475711	0.395675	0.366985	0.527407	0.334594	0.36918	0.272061	0.248461	0.411876	0.120144	0.385054	0.336357	0.303995	0.336264	0.266531	0.237418	0.178728	0.36918	0.490415	0.494581	0.494581	0.241162	0.512829	0.567525	0.550282	0.568917	0.656862	0.442811	0.35031	0.5069	0.430746	0.387127	0.352785	0.496434	0.494581	0.46641	0.396119	0.359196	0.179202	0.281234	0.296843
Rs079	0.684149	0.550607	0.544601	0.349423	0.60891	0.396615	0.423284	0.45182	0.51951	0.838289	0.570454	0.387241	0.331239	0.6417	0.649047	0.466708	0.480807	0.583208	0.533488	0.60891	0.498991	0.594112	0.537475	0.684149	0.423284	0.405311	0.476329	0.345322	0.423284	0.451934	0.666592	0.684138	0.665617	0.559207	0.459378	0.630526	0.441195	0.489982	0.738365	0.39625	0.559616	0.489982	0.478853	0.537694	0.385168	0.48254	0.63116	0.56749	0.411389
Rs080	0.526817	0.355418	0.183113	0.437482	0.341136	0.397062	0.405326	0.346722	0.422097	0.388658	0.357194	0.449376	0.29826	0.341136	0.494019	0.153016	0.355126	0.156524	0.311548	0.380634	0.194121	0.22639	0.213169	0.260188	0.244058	0.388764	0.507292	0.483288	0.510687	0.21039	0.529745	0.522189	0.476775	0.327138	0.46475	0.487087	0.371521	0.388658	0.475023	0.431404	0.301751	0.602962	0.510687	0.333006	0.286245	0.430872	0.271107	0.376804	0.34112
Rs081	0.373919	0.189472	0.296843	0.425251	0.474132	0.251885	0.307778	0.298559	0.634051	0.538946	0.366576	0.583481	0.249313	0.503119	0.508174	0.405414	0.591885	0.404696	0.490006	0.410432	0.579098	0.490006	0.467526	0.323908	0.524842	0.595493	0.381793	0.26015	0.466002	0.345979	0.330699	0.243481	0.323877	0.312917	0.445961	0.673743	0.398559	0.291109	0.429566	0.307255	0.275415	0.339622	0.383764	0.410432	0.237487	0.358016	0.385462	0.303949	0.294239
Rs082	0.421457	0.485471	0.422343	0.326256	0.518817	0.372369	0.333006	0.594558	0.439376	0.611802	0.357194	0.572483	0.352327	0.546988	0.551177	0.40433	0.307498	0.489007	0.507292	0.430644	0.448355	0.621703	0.336783	0.583976	0.567845	0.518817	0.454649	0.567845	0.456619	0.359921	0.404909	0.551177	0.396733	0.58203	0.491418	0.675139	0.371521	0.339868	0.530593	0.405429	0.502422	0.413832	0.356536	0.483288	0.497554	0.459043	0.518943	0.548655	0.421163
Rs083	0.194858	0.413796	0.325422	0.518368	0.47454	0.458145	0.386367	0.432499	0.402997	0.272061	0.212834	0.795515	0.306424	0.531699	0.599274	0.338405	0.726957	0.40542	0.385054	0.46641	0.430746	0.385054	0.346574	0.569552	0.553421	0.624072	0.436347	0.439011	0.386367	0.326942	0.385152	0.319689	0.327138	0.504378	0.394498	0.471798	0.512829	0.369699	0.458145	0.413796	0.404078	0.535811	0.584193	0.386367	0.36872	0.256542	0.329484	0.332528	0.296843
Rs084	0.579786	0.456203	0.561552	0.46228	0.489548	0.473153	0.622497	0.717797	0.547261	0.491418	0.553843	0.790104	0.435132	0.725937	0.6366	0.375315	0.405465	0.631121	0.505423	0.508086	0.614232	0.505423	0.335606	0.733937	0.455442	0.725937	0.505423	0.751708	0.563656	0.636691	0.527221	0.341136	0.558732	0.640467	0.725937	0.699938	0.473153	0.295673	0.645004	0.567428	0.932686	0.836248	0.900128	0.455442	0.614726	0.35031	0.371891	0.277989	0.29181
Rs085	0.584513	0.404551	0.224396	0.41441	0.389037	0.619923	0.356536	0.475585	0.551177	0.248321	0.277465	0.476775	0.241984	0.491691	0.422097	0.219457	0.513642	0.291109	0.405432	0.456619	0.324458	0.405432	0.35884	0.282232	0.510687	0.606102	0.508086	0.510687	0.456619	0.335526	0.589433	0.611227	0.404551	0.325511	0.439048	0.673287	0.530593	0.493444	0.372086	0.512765	0.235511	0.458072	0.456619	0.310016	0.357788	0.514941	0.369593	0.373862	0.312468
Rs086	0.725807	0.301469	0.243266	0.484003	0.563656	0.636873	0.326684	0.466045	0.762001	0.567845	0.4561	0.651954	0.21542	0.508086	0.483288	0.451177	0.475023	0.248129	0.421306	0.349674	0.31842	0.421306	0.38012	0.235184	0.473288	0.685017	0.373678	0.326684	0.709676	0.472231	0.438774	0.762001	0.550602	0.477913	0.685017	0.691808	0.438774	0.538858	0.491691	0.448072	0.439048	0.620205	0.527355	0.645138	0.377021	0.565323	0.474987	0.420141	0.437831
Rs087	0.422097	0.440829	0.489007	0.499566	0.676196	0.380111	0.458072	0.227226	0.496097	0.55524	0.382303	0.450683	0.349423	0.522046	0.916253	0.374744	0.459378	0.452228	0.567428	0.676196	0.728239	0.51027	0.554098	0.53031	0.54263	0.439808	0.51027	0.355418	0.355418	0.528895	0.533488	0.388185	0.305228	0.554311	0.551033	0.623516	0.594112	0.396881	0.476924	0.338175	0.449525	0.337873	0.405429	0.458072	0.145987	0.202043	0.554098	0.520497	0.338545
Rs088	0.475711	0.461937	0.367725	0.444966	0.597072	0.450495	0.459043	0.227098	0.538946	0.333586	0.338013	0.366619	0.21052	0.557058	0.413629	0.167939	0.348647	0.284338	0.401603	0.403473	0.342282	0.35031	0.363582	0.367497	0.376804	0.411876	0.512829	0.376804	0.376804	0.324423	0.401603	0.56316	0.43295	0.36754	0.467446	0.664931	0.537448	0.56316	0.403473	0.37738	0.221654	0.496434	0.430872	0.430872	0.262364	0.358016	0.374335	0.465897	0.294047
Rs089	0.500724	0.19275	0.222978	0.411389	0.438657	0.370969	0.26145	0.273001	0.370224	0.467926	0.357769	0.422343	0.195241	0.412681	0.362565	0.166314	0.458145	0.195448	0.403238	0.306913	0.253186	0.263476	0.284715	0.192423	0.239471	0.338573	0.454531	0.379233	0.512765	0.205582	0.353662	0.387883	0.345322	0.334597	0.520895	0.582355	0.47454	0.413858	0.476329	0.405311	0.322179	0.387277	0.354541	0.330443	0.191159	0.299418	0.220916	0.43295	0.240919
Rs090	0.333617	0.292271	0.359196	0.211816	0.428271	0.359232	0.293389	0.359561	0.297876	0.403473	0.376285	0.305901	0.15676	0.35031	0.517883	0.223144	0.537448	0.33024	0.471544	0.293389	0.333915	0.14304	0.327703	0.46367	0.317487	0.35031	0.528703	0.393473	0.224396	0.479573	0.365918	0.325511	0.441799	0.463897	0.254999	0.578091	0.235389	0.376804	0.359232	0.292271	0.333915	0.645789	0.504698	0.317487	0.377249	0.367725	0.395171	0.367725	0.303949
Rs091	0.352487	0.287044	0.300105	0.336047	0.447141	0.235002	0.288729	0.327138	0.317487	0.449742	0.261624	0.376804	0.152273	0.344487	0.477913	0.160724	0.333915	0.297206	0.436347	0.288729	0.235002	0.161911	0.292506	0.402498	0.312259	0.344487	0.547573	0.336357	0.336357	0.336472	0.385152	0.422343	0.327138	0.386595	0.36918	0.630863	0.401603	0.272061	0.486316	0.335834	0.257475	0.47697	0.439011	0.288729	0.218438	0.332528	0.385054	0.386595	0.296843
Rs092	0.530353	0.51886	0.513902	0.509022	0.829837	0.47697	0.544075	0.34311	0.698854	0.412997	0.303571	0.403473	0.446246	0.681417	0.527407	0.415515	0.516578	0.495032	0.768751	0.606596	0.566582	0.56808	0.66265	0.530353	0.574847	0.582977	0.697292	0.402997	0.327011	0.429784	0.532972	0.497554	0.710835	0.602818	0.552206	0.405294	0.733643	0.527407	0.535811	0.51886	0.4214	0.275415	0.402997	0.544075	0.332706	0.377249	0.434549	0.628563	0.424698
Rs093	0.399894	0.282562	0.246833	0.335639	0.315908	0.275415	0.26015	0.349852	0.417828	0.34112	0.233045	0.411261	0.181453	0.445961	0.478321	0.140722	0.339622	0.303571	0.331782	0.357788	0.275415	0.284154	0.263927	0.373919	0.28368	0.391894	0.284154	0.437831	0.410432	0.259885	0.454129	0.367095	0.323877	0.339586	0.26828	0.535592	0.330699	0.220492	0.457737	0.358548	0.251885	0.496575	0.466002	0.214687	0.237487	0.358016	0.385462	0.277973	0.242946
Rs094	0.347093	0.22683	0.213042	0.459214	0.652474	0.635231	0.383917	0.251523	0.650763	0.236005	0.287465	0.50528	0.222155	0.574934	0.548379	0.255876	0.605545	0.17804	0.496575	0.383917	0.403238	0.27951	0.372269	0.223479	0.470928	0.608836	0.437734	0.470928	0.356518	0.356675	0.382165	0.394229	0.414042	0.5334	0.574934	0.425024	0.521308	0.51559	0.383917	0.443895	0.321	0.510396	0.470928	0.441075	0.300905	0.280902	0.33387	0.524524	0.35515
Rs095	0.480807	0.439461	0.403732	0.223088	0.44382	0.581575	0.38012	0.430766	0.35884	0.336783	0.457625	0.274963	0.273293	0.415649	0.310808	0.292758	0.495757	0.326701	0.377456	0.353451	0.345187	0.377456	0.233615	0.39625	0.277465	0.38825	0.377456	0.38012	0.38012	0.427633	0.576691	0.508633	0.430766	0.325294	0.472807	0.355748	0.394369	0.477862	0.345187	0.410474	0.456412	0.560296	0.55705	0.38012	0.337228	0.327703	0.326163	0.384862	0.405006
Rs096	0.557883	0.379336	0.318288	0.472014	0.315043	0.5045	0.379233	0.478853	0.523568	0.337873	0.331101	0.344381	0.307069	0.465325	0.290244	0.218061	0.495491	0.290759	0.508598	0.379233	0.322179	0.354448	0.284715	0.277581	0.354541	0.492724	0.508598	0.430527	0.484594	0.30643	0.531699	0.467926	0.507841	0.462624	0.579735	0.489982	0.511886	0.387883	0.396286	0.516537	0.346276	0.515304	0.484594	0.283923	0.33426	0.37738	0.269707	0.43295	0.341003
Rs097	0.455507	0.245085	0.16587	0.450092	0.474175	0.405136	0.226815	0.487703	0.593368	0.476775	0.422189	0.525084	0.229108	0.501574	0.422708	0.252278	0.361959	0.126621	0.387395	0.226815	0.176878	0.25082	0.243554	0.18107	0.248321	0.396213	0.437406	0.439376	0.550602	0.252927	0.353662	0.533934	0.546544	0.471798	0.588585	0.623995	0.306034	0.346722	0.634711	0.388185	0.307498	0.524478	0.521615	0.439376	0.34311	0.38623	0.253864	0.413629	0.349852
Rs098	0.404214	0.267558	0.327138	0.420239	0.588585	0.405136	0.388083	0.305382	0.571605	0.371415	0.366619	0.467926	0.334468	0.529745	0.422708	0.212834	0.337267	0.236622	0.545619	0.36339	0.355126	0.209147	0.373607	0.355423	0.248321	0.421531	0.60446	0.493444	0.466045	0.393634	0.456316	0.396733	0.37949	0.39625	0.683895	0.469844	0.570726	0.346722	0.431112	0.314078	0.284508	0.361959	0.466045	0.413401	0.245471	0.333586	0.229766	0.413629	0.323877
Rs099	0.491841	0.342282	0.332528	0.404188	0.35031	0.526287	0.342179	0.413629	0.4561	0.403473	0.376285	0.529044	0.324885	0.375627	0.376804	0.280694	0.349523	0.252278	0.417477	0.269859	0.359232	0.417477	0.273636	0.409603	0.246869	0.45567	0.317394	0.504698	0.420141	0.358325	0.281909	0.376804	0.470787	0.654667	0.573453	0.513553	0.26828	0.325511	0.333915	0.342282	0.557058	0.537448	0.44754	0.367497	0.40542	0.262364	0.310614	0.313658	0.277973
Rs100	0.338699	0.430885	0.339586	0.297566	0.493218	0.289612	0.400531	0.288658	0.435689	0.439432	0.356675	0.508633	0.239003	0.464231	0.357194	0.270167	0.293893	0.365398	0.297783	0.297876	0.365598	0.451934	0.336264	0.44406	0.427929	0.585591	0.509093	0.227259	0.373862	0.266628	0.398559	0.383862	0.239868	0.22683	0.618381	0.525691	0.415649	0.383862	0.392266	0.272661	0.314304	0.27951	0.250248	0.400531	0.227585	0.320715	0.346574	0.435126	0.366576
Rs101	0.428473	0.174566	0.275412	0.45383	0.531699	0.430746	0.386367	0.327138	0.457064	0.422343	0.339586	0.622717	0.252356	0.561552	0.477913	0.233045	0.526287	0.25672	0.490415	0.288729	0.303995	0.245292	0.403732	0.304859	0.312259	0.420473	0.490415	0.494581	0.439011	0.336472	0.287513	0.369699	0.432499	0.536127	0.624072	0.532423	0.512829	0.422343	0.430746	0.387127	0.404078	0.368757	0.36105	0.412343	0.316076	0.306552	0.251523	0.473606	0.199205
Rs102	0.550682	0.368257	0.208914	0.374335	0.375627	0.411876	0.317487	0.359561	0.347887	0.517883	0.268072	0.411261	0.314984	0.147369	0.276721	0.291004	0.265514	0.179957	0.417477	0.317487	0.194153	0.366184	0.247661	0.285989	0.317487	0.483841	0.589327	0.393473	0.44754	0.186914	0.365918	0.580403	0.38623	0.405057	0.573453	0.452928	0.381993	0.430872	0.333915	0.394925	0.359232	0.429566	0.293389	0.420141	0.323182	0.424883	0.310614	0.395896	0.445027
Rs103	0.352487	0.263513	0.351398	0.393205	0.624072	0.352785	0.243266	0.4051	0.367497	0.5069	0.366985	0.440396	0.279025	0.420473	0.5069	0.301105	0.526287	0.359374	0.436347	0.336357	0.352785	0.336264	0.403732	0.352487	0.386367	0.36918	0.436347	0.412343	0.386367	0.405465	0.287513	0.319689	0.327138	0.443753	0.531699	0.360572	0.35031	0.477913	0.352785	0.218051	0.404078	0.448799	0.288729	0.494581	0.316076	0.256542	0.356883	0.443753	0.296843
Rs104	0.263	0.292271	0.386595	0.345348	0.671893	0.309222	0.44754	0.441799	0.494989	0.403473	0.405273	0.560793	0.343972	0.671893	0.718554	0.375561	0.447836	0.475422	0.471544	0.44754	0.467446	0.417477	0.384862	0.46367	0.597072	0.512829	0.471544	0.367497	0.317487	0.494399	0.381993	0.300819	0.38623	0.494669	0.605202	0.39577	0.43606	0.230201	0.496434	0.292271	0.496434	0.314304	0.597072	0.44754	0.297206	0.213574	0.366184	0.424883	0.277973
Rs105	0.438227	0.276253	0.311141	0.344377	0.51027	0.413832	0.278996	0.414161	0.404551	0.458072	0.402714	0.449376	0.263435	0.482871	0.30779	0.175488	0.396286	0.245471	0.420784	0.193838	0.270731	0.281022	0.328236	0.340589	0.235511	0.356119	0.583303	0.448072	0.422097	0.264422	0.292053	0.405429	0.388185	0.489657	0.761584	0.507528	0.338573	0.405429	0.413832	0.253781	0.413832	0.322179	0.257017	0.422097	0.326488	0.268174	0.214932	0.450495	0.282562
Rs106	0.473325	0.236235	0.39625	0.472014	0.549883	0.533488	0.484594	0.396615	0.553421	0.413858	0.385168	0.369699	0.353465	0.579735	0.554937	0.268072	0.640467	0.316076	0.565757	0.457195	0.476329	0.354448	0.392928	0.300054	0.457195	0.292053	0.565757	0.634126	0.379233	0.348237	0.531699	0.525084	0.537694	0.693147	0.549883	0.519835	0.47454	0.496097	0.396286	0.329325	0.346276	0.404078	0.666915	0.457195	0.386904	0.324736	0.321	0.461937	0.240919
Rs107	0.420682	0.329325	0.369582	0.354231	0.744039	0.5045	0.404551	0.296532	0.648732	0.413858	0.385168	0.477913	0.245251	0.549883	0.496097	0.414797	0.404078	0.290759	0.565757	0.404551	0.422262	0.307928	0.337358	0.346574	0.457195	0.438657	0.508598	0.330443	0.430527	0.542054	0.47454	0.650247	0.478853	0.378066	0.520895	0.649047	0.592323	0.413858	0.44893	0.305228	0.188647	0.352785	0.602377	0.484594	0.28425	0.461937	0.375067	0.461937	0.39507
Rs108	0.242841	0.224178	0.237134	0.255876	0.445886	0.217626	0.274963	0.265179	0.278538	0.291734	0.260066	0.369509	0.195745	0.445886	0.512612	0.132663	0.378205	0.231658	0.377723	0.226173	0.317709	0.181979	0.228477	0.342925	0.25027	0.283367	0.492133	0.380324	0.226173	0.247348	0.323907	0.20893	0.373392	0.393435	0.33466	0.476233	0.286942	0.185399	0.489559	0.309013	0.291734	0.280981	0.408494	0.202642	0.211816	0.177415	0.186586	0.384578	0.217524
Rs109	0.399894	0.307255	0.296843	0.335639	0.532972	0.299513	0.214687	0.490931	0.60015	0.421163	0.395564	0.321117	0.276712	0.532972	0.449333	0.280694	0.27951	0.320138	0.381793	0.33247	0.275415	0.331782	0.346165	0.299811	0.357788	0.418562	0.490006	0.357788	0.357788	0.355423	0.398559	0.367095	0.461078	0.385054	0.532972	0.503844	0.295905	0.291109	0.457737	0.189472	0.299513	0.329521	0.524842	0.410432	0.287497	0.277973	0.274237	0.303949	0.268264
Rs110	0.514222	0.33426	0.247196	0.532171	0.535811	0.61417	0.335035	0.554825	0.603484	0.351806	0.347537	0.376521	0.3615	0.394732	0.395754	0.320715	0.499627	0.170626	0.493365	0.386329	0.208705	0.335141	0.299302	0.190435	0.360353	0.318746	0.493365	0.589927	0.440396	0.300028	0.516578	0.674467	0.621517	0.513902	0.598331	0.359374	0.457737	0.540936	0.431849	0.386904	0.277698	0.499627	0.448799	0.468567	0.395711	0.385809	0.28316	0.414797	0.347537
Rs111	0.354541	0.31178	0.159656	0.461261	0.322179	0.487549	0.290244	0.519835	0.516075	0.305228	0.347668	0.46067	0.249001	0.370969	0.568466	0.261624	0.413796	0.131763	0.292053	0.440527	0.19275	0.247602	0.224178	0.217965	0.313775	0.422262	0.292053	0.440527	0.337873	0.27165	0.575928	0.537694	0.519835	0.45182	0.396286	0.471461	0.257475	0.345322	0.405311	0.36179	0.281697	0.657418	0.533488	0.362565	0.341003	0.385168	0.337358	0.255115	0.269707
Rs112	0.419127	0.460019	0.36872	0.246658	0.681417	0.394732	0.279383	0.395754	0.357788	0.310343	0.303571	0.220492	0.269316	0.522353	0.558179	0.198451	0.429566	0.424698	0.509239	0.485235	0.394732	0.351015	0.394386	0.473194	0.485235	0.359834	0.697292	0.457064	0.279383	0.358325	0.474132	0.335035	0.451324	0.443753	0.411127	0.325251	0.418562	0.335035	0.598331	0.40445	0.4214	0.324206	0.429665	0.302913	0.25672	0.223098	0.29347	0.46426	0.395711
Rs113	0.419127	0.254167	0.316076	0.354872	0.437795	0.566582	0.457064	0.423153	0.620152	0.217252	0.33024	0.449333	0.201063	0.552206	0.468567	0.174353	0.621597	0.287497	0.56808	0.377021	0.368757	0.21444	0.337228	0.319044	0.429665	0.493365	0.509239	0.457064	0.23392	0.429784	0.532972	0.440396	0.540936	0.504378	0.385152	0.554825	0.401603	0.386329	0.368757	0.301795	0.225656	0.516578	0.673287	0.279383	0.414944	0.40542	0.375708	0.323182	0.189859
Rs114	0.412909	0.396881	0.263513	0.291734	0.243641	0.363822	0.396779	0.525387	0.388083	0.405429	0.402714	0.71924	0.263435	0.456203	0.701694	0.236931	0.370969	0.386904	0.158419	0.301469	0.339724	0.420784	0.137181	0.464203	0.422097	0.567428	0.325473	0.53031	0.502139	0.21039	0.549883	0.30779	0.362868	0.369582	0.430227	0.632691	0.205042	0.218843	0.580886	0.396881	0.580886	0.533488	0.559298	0.214457	0.377781	0.342282	0.338545	0.316964	0.307255
Rs115	0.543485	0.474741	0.386367	0.342925	0.312342	0.389037	0.527355	0.611227	0.405326	0.430644	0.4561	0.67634	0.342172	0.622497	0.762001	0.263965	0.530593	0.558179	0.373678	0.421994	0.491691	0.421306	0.253368	0.661268	0.473288	0.622497	0.523961	0.584513	0.527355	0.297401	0.605828	0.265564	0.611227	0.536753	0.508086	0.562596	0.341136	0.202385	0.806772	0.651671	0.883733	0.651954	0.645138	0.239673	0.457064	0.342179	0.312468	0.393473	0.357788
Rs116	0.575428	0.396881	0.413796	0.428935	0.482871	0.522046	0.502139	0.496399	0.493444	0.405429	0.430885	0.525084	0.430489	0.404909	0.380111	0.366985	0.563341	0.308942	0.583303	0.422097	0.466476	0.472077	0.469314	0.340589	0.324458	0.456203	0.526144	0.372086	0.347989	0.487319	0.610507	0.513642	0.61776	0.39625	0.482871	0.507528	0.438657	0.54263	0.339724	0.396881	0.363822	0.322179	0.301469	0.502139	0.40445	0.509336	0.365214	0.394925	0.282562
Rs117	0.524217	0.456203	0.531699	0.587444	0.725937	0.614232	0.563656	0.752888	0.883733	0.438774	0.553843	0.718645	0.406145	0.725937	0.318146	0.489725	0.693147	0.47697	0.741811	0.455442	0.527221	0.505423	0.56518	0.471573	0.535485	0.869038	0.741811	0.357804	0.481418	0.668941	0.584379	0.491418	0.717797	0.545157	0.869038	0.570726	0.584379	0.491418	0.645004	0.51027	0.473153	0.567984	0.717807	0.622497	0.552206	0.483841	0.371891	0.325617	0.445961
Rs118	0.420141	0.299418	0.395896	0.279025	0.526287	0.394925	0.325511	0.39577	0.603484	0.604646	0.487545	0.288658	0.321746	0.557058	0.38623	0.356675	0.520497	0.366576	0.573453	0.430872	0.604646	0.573453	0.466708	0.342179	0.517883	0.411876	0.637992	0.430872	0.325511	0.358325	0.457737	0.470787	0.341702	0.443753	0.588807	0.782714	0.365598	0.470787	0.342282	0.227098	0.268174	0.211945	0.333915	0.517883	0.358016	0.376285	0.384862	0.465897	0.338013
Rs119	0.364017	0.225033	0.312917	0.384578	0.464231	0.365598	0.373862	0.263965	0.58984	0.560793	0.385662	0.652474	0.266402	0.553843	0.46842	0.425876	0.486265	0.347537	0.451934	0.322569	0.447836	0.509093	0.395104	0.389993	0.427929	0.523071	0.297783	0.297876	0.400531	0.312077	0.295905	0.439432	0.366619	0.474666	0.523071	0.663841	0.415649	0.357194	0.365598	0.248563	0.339622	0.304203	0.427929	0.4561	0.303571	0.348114	0.436186	0.465897	0.258363
Rs120	0.491715	0.320316	0.169517	0.596536	0.511886	0.585103	0.345531	0.414274	0.514222	0.404849	0.40433	0.536753	0.288549	0.403672	0.378874	0.284338	0.394732	0.067615	0.419546	0.421517	0.244176	0.321908	0.225695	0.143408	0.252441	0.429648	0.419546	0.593368	0.593368	0.315448	0.385152	0.576699	0.469844	0.48313	0.633247	0.480973	0.437795	0.516075	0.554331	0.599901	0.313169	0.774222	0.562596	0.475585	0.377895	0.368371	0.236005	0.368371	0.414231
Rs121	0.445795	0.301795	0.241968	0.413712	0.359834	0.448799	0.429665	0.395754	0.420141	0.386329	0.33024	0.48803	0.324885	0.311044	0.412997	0.213042	0.324206	0.154105	0.351015	0.327011	0.225656	0.257925	0.231867	0.295513	0.211941	0.359834	0.45367	0.514222	0.377021	0.271934	0.532972	0.558179	0.451324	0.494669	0.522353	0.405294	0.315908	0.386329	0.368757	0.301795	0.318746	0.486725	0.544075	0.377021	0.359374	0.377249	0.29347	0.323182	0.287497
Rs122	0.473325	0.305228	0.15702	0.274188	0.438657	0.5045	0.26145	0.345322	0.494581	0.362565	0.413339	0.369699	0.195241	0.412681	0.244782	0.124971	0.328092	0.0878177	0.403238	0.239471	0.168028	0.220916	0.234704	0.213042	0.217965	0.492724	0.565757	0.457195	0.430527	0.194087	0.36918	0.525084	0.423284	0.300105	0.549883	0.550607	0.32039	0.467926	0.44893	0.405311	0.253186	0.545157	0.404551	0.379233	0.360236	0.461937	0.245014	0.461937	0.423241
Rs123	0.534551	0.324736	0.367725	0.413217	0.439275	0.48803	0.376804	0.368371	0.383862	0.333586	0.247661	0.451177	0.275824	0.385208	0.441799	0.217949	0.348647	0.348114	0.573453	0.300819	0.368257	0.35031	0.252356	0.367497	0.403473	0.411876	0.401603	0.548655	0.459043	0.418124	0.265514	0.38623	0.42394	0.645321	0.439275	0.473606	0.419665	0.308268	0.342282	0.43295	0.450495	0.552246	0.548655	0.276721	0.367725	0.294047	0.384862	0.475799	0.283946
Rs124	0.372666	0.218843	0.226598	0.529855	0.546988	0.502422	0.265564	0.476775	0.439376	0.363965	0.281208	0.458072	0.246967	0.413456	0.388658	0.198478	0.542337	0.103344	0.507292	0.356536	0.279279	0.186385	0.260797	0.198313	0.223005	0.341136	0.507292	0.567845	0.456619	0.30643	0.529745	0.522189	0.422708	0.58203	0.546988	0.404849	0.421531	0.413976	0.55958	0.431404	0.2573	0.57219	0.567845	0.405326	0.335035	0.325511	0.247009	0.350829	0.367095
Rs125	0.663763	0.413629	0.702671	0.455955	0.803918	0.571856	0.613193	0.452928	0.534551	0.59595	0.414715	0.521703	0.53704	0.557058	0.56316	0.613104	0.562147	0.56453	0.861135	0.48803	0.604646	0.45567	0.5334	0.597072	0.48803	0.359232	0.573453	0.613193	0.580403	0.804996	0.457737	0.629852	0.760413	0.712758	0.534551	0.434407	0.717248	0.59595	0.368257	0.441799	0.548655	0.469774	0.580403	0.726957	0.540337	0.564338	0.43496	0.599429	0.405273
Rs126	0.428473	0.311141	0.251314	0.393205	0.344487	0.430746	0.178728	0.46067	0.420141	0.422343	0.366985	0.350829	0.252356	0.502711	0.449742	0.248461	0.557058	0.271888	0.385054	0.412343	0.303995	0.385054	0.319175	0.32839	0.288729	0.36918	0.245292	0.412343	0.46641	0.271934	0.401603	0.422343	0.432499	0.473606	0.36918	0.41464	0.301519	0.369699	0.430746	0.387127	0.430746	0.621597	0.46641	0.386367	0.316076	0.306552	0.356883	0.386595	0.296843
Rs127	0.528895	0.354018	0.318288	0.472014	0.438657	0.5045	0.379233	0.396615	0.494581	0.496097	0.357769	0.477913	0.334468	0.438657	0.387883	0.303571	0.46732	0.290759	0.626381	0.306913	0.346276	0.403238	0.337358	0.370671	0.404551	0.549883	0.508598	0.512765	0.512765	0.465093	0.186858	0.467926	0.396615	0.702322	0.675046	0.582355	0.456316	0.387883	0.322179	0.431979	0.44893	0.607677	0.484594	0.404551	0.414303	0.324736	0.432225	0.554311	0.39507
Rs128	0.411672	0.296218	0.387241	0.317822	0.601498	0.387277	0.421517	0.361631	0.514222	0.516075	0.376159	0.497554	0.288549	0.456316	0.576699	0.311006	0.394732	0.359374	0.586601	0.345531	0.387277	0.232961	0.383919	0.491715	0.448186	0.353662	0.787271	0.475585	0.395542	0.441833	0.437795	0.516075	0.414274	0.513902	0.570726	0.675129	0.493365	0.328863	0.495491	0.227226	0.289639	0.294649	0.562596	0.421517	0.325251	0.39577	0.338659	0.42394	0.331993
Rs129	0.285989	0.368257	0.306552	0.43496	0.277989	0.467446	0.393473	0.50064	0.485088	0.300819	0.348114	0.662576	0.324885	0.512829	0.548655	0.291004	0.579098	0.414797	0.270874	0.393473	0.333915	0.417477	0.327703	0.436271	0.534551	0.637992	0.366184	0.504698	0.342179	0.229113	0.365918	0.25319	0.38623	0.453996	0.428271	0.545301	0.315908	0.430872	0.285125	0.292271	0.439275	0.547349	0.475711	0.342179	0.46426	0.313658	0.310614	0.313658	0.180335
Rs130	0.304859	0.287044	0.204794	0.364218	0.47454	0.486316	0.265739	0.352456	0.393473	0.319689	0.286942	0.468567	0.252356	0.344487	0.369699	0.223144	0.359232	0.141651	0.436347	0.199781	0.235002	0.245292	0.192423	0.259397	0.312259	0.344487	0.490415	0.553421	0.412343	0.271934	0.301519	0.477913	0.302446	0.473606	0.561552	0.471798	0.401603	0.369699	0.404078	0.361152	0.257475	0.439275	0.439011	0.312259	0.316076	0.281234	0.251523	0.536127	0.405057
Rs131	0.250051	0.301795	0.218438	0.299302	0.359834	0.294649	0.169382	0.317792	0.317487	0.286245	0.227585	0.449333	0.119033	0.385152	0.386329	0.127833	0.228895	0.237487	0.172767	0.190435	0.271118	0.257925	0.207174	0.343141	0.327011	0.411127	0.351015	0.351703	0.351703	0.241162	0.222818	0.310343	0.156524	0.332528	0.465194	0.621517	0.222818	0.286245	0.271118	0.186726	0.271118	0.402167	0.279383	0.302913	0.232622	0.199568	0.242177	0.271888	0.213389
Rs132	0.402997	0.260152	0.0895668	0.402959	0.271118	0.40445	0.239725	0.299933	0.459043	0.277698	0.242177	0.43209	0.144436	0.318746	0.369085	0.137735	0.234934	0.0606246	0.198566	0.239725	0.186726	0.242051	0.17255	0.148763	0.262715	0.47697	0.335141	0.386329	0.386329	0.142102	0.349523	0.451324	0.377895	0.396119	0.448799	0.602996	0.206423	0.317792	0.326488	0.360236	0.231178	0.499627	0.394732	0.286245	0.262179	0.33024	0.231867	0.277596	0.267494
Rs133	0.473194	0.377781	0.396119	0.383859	0.437795	0.631121	0.377021	0.34311	0.410432	0.440396	0.44465	0.538946	0.363582	0.493365	0.468567	0.375561	0.526287	0.287497	0.509239	0.377021	0.448799	0.45367	0.309829	0.445795	0.279383	0.385152	0.303387	0.457064	0.485235	0.453598	0.315908	0.412997	0.480311	0.664568	0.522353	0.462452	0.401603	0.386329	0.368757	0.377781	0.566582	0.457737	0.514222	0.402997	0.359374	0.271888	0.320138	0.46426	0.313473
Rs134	0.521703	0.415174	0.328304	0.388712	0.249769	0.405057	0.414231	0.395711	0.40433	0.340141	0.242647	0.617372	0.347062	0.265017	0.434044	0.313034	0.212834	0.374476	0.332573	0.18539	0.358661	0.385216	0.235595	0.521703	0.38606	0.646384	0.440786	0.544601	0.423241	0.356362	0.189472	0.322819	0.475799	0.615986	0.577391	0.776329	0.331101	0.271525	0.18539	0.415174	0.593109	0.512853	0.331993	0.2807	0.446087	0.317994	0.274489	0.324885	0.280069
Rs135	0.473325	0.487549	0.343606	0.224178	0.387364	0.298648	0.283923	0.423284	0.288729	0.554937	0.385168	0.369699	0.271227	0.269581	0.617457	0.294047	0.404078	0.453277	0.307928	0.484594	0.476329	0.354448	0.31069	0.618507	0.430527	0.492724	0.565757	0.430527	0.512765	0.41723	0.531699	0.362565	0.227539	0.251314	0.387364	0.519835	0.27387	0.337873	0.422262	0.329325	0.476329	0.674368	0.404551	0.404551	0.308942	0.404779	0.432225	0.250628	0.512853
Rs136	0.420682	0.405311	0.269498	0.441242	0.412681	0.5045	0.430527	0.507841	0.494581	0.413858	0.413339	0.567525	0.382452	0.438657	0.525084	0.376285	0.352785	0.290759	0.354448	0.404551	0.322179	0.565757	0.337358	0.323043	0.541752	0.610507	0.403238	0.457195	0.283923	0.283699	0.306034	0.496097	0.568466	0.65678	0.549883	0.550607	0.229418	0.467926	0.298648	0.354018	0.533488	0.524478	0.484594	0.541752	0.532086	0.350712	0.403238	0.43295	0.265017
Rs137	0.323043	0.19275	0.15702	0.441242	0.492724	0.422262	0.217965	0.537694	0.553421	0.387883	0.413339	0.458916	0.271227	0.492724	0.525084	0.268072	0.378103	0.138665	0.403238	0.404551	0.209701	0.220916	0.259397	0.152418	0.330443	0.412681	0.454531	0.512765	0.404551	0.241162	0.420473	0.387883	0.507841	0.492476	0.610507	0.460994	0.32039	0.313775	0.563341	0.379336	0.346276	0.486316	0.512765	0.430527	0.33426	0.299418	0.174396	0.324736	0.289709
Rs138	0.383628	0.571856	0.473606	0.374335	0.542681	0.764698	0.420141	0.531412	0.514941	0.325511	0.376285	0.46842	0.404596	0.401603	0.548655	0.510826	0.476823	0.385809	0.471544	0.44754	0.526287	0.471544	0.445486	0.550682	0.629861	0.483841	0.589327	0.629861	0.342179	0.547567	0.474132	0.548655	0.441799	0.664568	0.512829	0.513553	0.381993	0.682186	0.238605	0.316964	0.467446	0.547349	0.44754	0.629861	0.55957	0.395896	0.395171	0.424883	0.415174
Rs139	0.226919	0.551033	0.458145	0.416898	0.37307	0.310155	0.341409	0.379818	0.202385	0.448355	0.289612	0.513642	0.389194	0.37307	0.718645	0.331101	0.388514	0.51886	0.342424	0.439048	0.510826	0.437734	0.345187	0.684752	0.547261	0.42186	0.543095	0.491691	0.41373	0.380758	0.356119	0.279279	0.156675	0.528206	0.42186	0.649641	0.456203	0.348271	0.333144	0.363822	0.538997	0.439808	0.439048	0.36494	0.271118	0.194153	0.382165	0.526287	0.349523
Rs140	0.437648	0.345009	0.284587	0.265179	0.511886	0.361959	0.187903	0.414274	0.402997	0.378874	0.34876	0.16206	0.219933	0.429648	0.378874	0.137735	0.303995	0.218438	0.419546	0.421517	0.313169	0.321908	0.225695	0.246593	0.252441	0.306034	0.419546	0.370224	0.297903	0.241162	0.552206	0.431517	0.441673	0.36872	0.456316	0.369747	0.27387	0.304766	0.495491	0.320316	0.313169	0.394732	0.321434	0.321434	0.227612	0.265716	0.286015	0.368371	0.358661
Rs141	0.394369	0.380498	0.306424	0.273293	0.332171	0.361023	0.350575	0.334468	0.508113	0.409486	0.394495	0.261295	0.32969	0.464985	0.501859	0.28984	0.532355	0.342884	0.451527	0.551892	0.487354	0.512152	0.255876	0.35884	0.397741	0.406145	0.289008	0.426729	0.36957	0.294949	0.583208	0.409486	0.362639	0.256799	0.272614	0.541517	0.395155	0.324928	0.361023	0.400636	0.280981	0.499566	0.495757	0.315503	0.269316	0.383726	0.448724	0.404596	0.373825
Rs142	0.534551	0.299418	0.190044	0.424207	0.439275	0.394925	0.325511	0.42394	0.560793	0.540107	0.455796	0.48103	0.264587	0.411876	0.531412	0.328504	0.375315	0.184255	0.301519	0.430872	0.199181	0.301519	0.317177	0.246869	0.276721	0.439275	0.35031	0.376804	0.517883	0.312375	0.476823	0.531412	0.545301	0.332528	0.557058	0.434407	0.314304	0.413629	0.479483	0.350712	0.342282	0.552246	0.333915	0.48803	0.303949	0.465897	0.327703	0.294047	0.338013
Rs143	0.554988	0.405429	0.369699	0.408494	0.575975	0.422379	0.430644	0.476775	0.611227	0.494019	0.439432	0.371415	0.380498	0.605828	0.551177	0.296116	0.379818	0.317792	0.562862	0.456619	0.448355	0.507292	0.310808	0.372666	0.356536	0.438774	0.404638	0.538858	0.356536	0.370969	0.421531	0.46662	0.692999	0.61482	0.668349	0.458916	0.323893	0.316337	0.502422	0.405429	0.475023	0.45778	0.287543	0.405326	0.412997	0.325511	0.40116	0.48803	0.367095
Rs144	0.44276	0.375153	0.315853	0.208868	0.241213	0.327703	0.337228	0.467526	0.373106	0.445486	0.373196	0.433731	0.274599	0.383919	0.467526	0.291291	0.488745	0.461346	0.259397	0.292506	0.337228	0.421916	0.224692	0.50528	0.433585	0.464357	0.364757	0.374744	0.365398	0.341749	0.443077	0.477235	0.326163	0.284046	0.374744	0.693147	0.271227	0.300304	0.257185	0.237952	0.365398	0.424207	0.424239	0.28316	0.364167	0.415934	0.425091	0.312571	0.272347
Rs145	0.491715	0.227226	0.360572	0.265179	0.511886	0.413253	0.252441	0.469844	0.514222	0.576699	0.433318	0.536753	0.235905	0.378354	0.328863	0.376285	0.566582	0.36872	0.52776	0.230462	0.337267	0.276446	0.383919	0.411672	0.321434	0.378354	0.52776	0.421517	0.532743	0.453598	0.385152	0.487087	0.414274	0.290759	0.456316	0.675129	0.385152	0.431517	0.413253	0.227226	0.244176	0.394732	0.370224	0.448186	0.405294	0.578091	0.338659	0.315727	0.358661
Rs146	0.455507	0.2016	0.278348	0.420239	0.347423	0.284508	0.292773	0.354172	0.370224	0.533934	0.339951	0.710231	0.254426	0.323893	0.396733	0.261624	0.387277	0.325251	0.437406	0.185142	0.307498	0.294305	0.31954	0.355423	0.315762	0.474175	0.490049	0.315762	0.580455	0.359732	0.247602	0.322625	0.236389	0.369582	0.588585	0.767096	0.456316	0.253632	0.379818	0.290547	0.405136	0.346276	0.413401	0.339293	0.222482	0.308268	0.303874	0.359561	0.226238
Rs147	0.437648	0.537381	0.442811	0.40238	0.511886	0.313169	0.395542	0.414274	0.429665	0.641238	0.40433	0.497554	0.288549	0.540873	0.487087	0.338405	0.448799	0.504556	0.47219	0.421517	0.387277	0.419546	0.53807	0.609498	0.532743	0.666036	0.715812	0.274914	0.532743	0.41723	0.385152	0.431517	0.31162	0.396119	0.601498	0.640037	0.552206	0.487087	0.495491	0.450369	0.495491	0.47697	0.321434	0.562596	0.299933	0.42394	0.483841	0.578091	0.473072
Rs148	0.587736	0.258708	0.293596	0.411389	0.492724	0.5045	0.379233	0.296532	0.648732	0.496097	0.5347	0.545928	0.195241	0.642256	0.267255	0.227585	0.515304	0.204623	0.565757	0.217965	0.370969	0.307928	0.392928	0.277581	0.217965	0.465325	0.565757	0.379233	0.571605	0.315448	0.36918	0.440527	0.507841	0.433636	0.708947	0.720506	0.47454	0.440527	0.658651	0.487549	0.322179	0.430746	0.457195	0.354541	0.308942	0.404779	0.245014	0.522562	0.367671
Rs149	0.579786	0.404909	0.344487	0.377723	0.543615	0.555391	0.268857	0.474175	0.439048	0.438774	0.356017	0.372369	0.377974	0.438255	0.388764	0.322671	0.456758	0.294649	0.55949	0.357804	0.397167	0.505423	0.38825	0.373934	0.334814	0.389465	0.454129	0.508086	0.430125	0.370448	0.42186	0.546988	0.529745	0.607677	0.543615	0.403672	0.37307	0.438774	0.42186	0.404909	0.473153	0.380772	0.357804	0.430125	0.385152	0.35031	0.371891	0.542681	0.418562
Rs150	0.605281	0.449525	0.335834	0.399947	0.567428	0.611658	0.396779	0.362868	0.404551	0.355418	0.348647	0.387883	0.324928	0.430227	0.513642	0.312917	0.379818	0.236622	0.526144	0.474741	0.493875	0.472077	0.328236	0.340589	0.324458	0.430227	0.371993	0.559298	0.372086	0.525059	0.438657	0.485471	0.525387	0.639872	0.51027	0.370326	0.371521	0.431404	0.413832	0.534082	0.466476	0.533488	0.372086	0.347989	0.377781	0.316964	0.392613	0.479483	0.412615
Rs151	0.519886	0.47854	0.41464	0.40238	0.429648	0.554331	0.448186	0.336313	0.514222	0.458916	0.525691	0.527407	0.382452	0.601498	0.516075	0.311006	0.458145	0.332706	0.52776	0.448186	0.524478	0.52776	0.44276	0.491715	0.345531	0.456316	0.369536	0.532743	0.532743	0.491338	0.335141	0.404849	0.414274	0.545651	0.456316	0.573346	0.36918	0.458916	0.387277	0.42297	0.46732	0.598331	0.503755	0.448186	0.405294	0.39577	0.453069	0.513553	0.358661
Rs152	0.381804	0.248889	0.358399	0.165362	0.231876	0.324918	0.363945	0.356963	0.280099	0.394717	0.33712	0.52109	0.145878	0.403726	0.483982	0.2324	0.404945	0.461018	0.331659	0.249535	0.35477	0.223446	0.229113	0.582475	0.363945	0.403726	0.3905	0.394717	0.394717	0.386958	0.410469	0.286584	0.27706	0.346053	0.285943	0.624642	0.330755	0.204346	0.35477	0.286584	0.417291	0.425075	0.602356	0.196891	0.326651	0.380662	0.314894	0.244746	0.198341
Rs153	0.390429	0.295024	0.242177	0.196669	0.304203	0.287252	0.247009	0.311991	0.25027	0.278556	0.192631	0.512612	0.190819	0.329521	0.510396	0.211655	0.344377	0.404188	0.15933	0.223479	0.347093	0.295905	0.207422	0.51297	0.347093	0.496575	0.295905	0.347093	0.40116	0.266628	0.308684	0.253864	0.295024	0.237134	0.355496	0.46532	0.258674	0.206236	0.26256	0.269707	0.479624	0.371776	0.295799	0.247009	0.248261	0.264335	0.233398	0.213042	0.228259
Rs154	0.412997	0.299933	0.297206	0.250891	0.277698	0.317792	0.317792	0.504556	0.298559	0.405294	0.344119	0.482781	0.262994	0.40445	0.563835	0.167939	0.490931	0.320715	0.368757	0.2931	0.451324	0.318746	0.115277	0.47697	0.222482	0.326488	0.318746	0.710835	0.423153	0.291053	0.499627	0.325251	0.396119	0.395564	0.301795	0.593472	0.189472	0.18215	0.532086	0.396119	0.442474	0.682752	0.510164	0.200009	0.44465	0.337228	0.333129	0.28316	0.299302
Rs155	0.421163	0.322819	0.218254	0.30266	0.234934	0.315027	0.323877	0.313473	0.339951	0.2807	0.227425	0.442327	0.200419	0.385216	0.646384	0.136576	0.245014	0.248461	0.206423	0.298559	0.367671	0.299513	0.073571	0.367095	0.249769	0.385216	0.206423	0.553451	0.412615	0.174865	0.479624	0.306018	0.424698	0.446087	0.332573	0.574239	0.214932	0.119432	0.482081	0.494669	0.452228	0.557389	0.43209	0.116237	0.258363	0.248261	0.269316	0.300905	0.300905
Rs156	0.579786	0.430227	0.344487	0.351055	0.298493	0.282098	0.405432	0.588585	0.439048	0.491418	0.408661	0.589433	0.272614	0.600774	0.6366	0.202043	0.456758	0.535811	0.358819	0.334814	0.473153	0.405339	0.237968	0.638627	0.405432	0.600774	0.454129	0.622497	0.563656	0.318237	0.42186	0.295673	0.529745	0.458145	0.489548	0.735029	0.282098	0.210516	0.676752	0.567428	0.709542	0.836248	0.481418	0.268857	0.493365	0.375627	0.371891	0.35031	0.340601
Rs157	0.468567	0.325251	0.237487	0.35088	0.431849	0.395754	0.317792	0.218438	0.441799	0.442474	0.326701	0.368371	0.30266	0.335035	0.405294	0.217949	0.265017	0.157345	0.4214	0.2931	0.360236	0.318746	0.239655	0.286245	0.222482	0.326488	0.47697	0.423153	0.423153	0.25458	0.385216	0.501314	0.359374	0.435318	0.549632	0.526781	0.332573	0.325251	0.369085	0.299933	0.269002	0.341003	0.34311	0.34311	0.227585	0.320138	0.299302	0.475422	0.383859
Rs158	0.437831	0.376521	0.36754	0.242647	0.275415	0.315802	0.449333	0.306018	0.411261	0.376521	0.346165	0.566238	0.254486	0.402167	0.490931	0.217949	0.347093	0.385462	0.365918	0.291109	0.469774	0.365918	0.227425	0.587363	0.243481	0.579098	0.365918	0.478321	0.315802	0.312077	0.419665	0.203249	0.473072	0.366184	0.299513	0.741529	0.231882	0.180776	0.440786	0.39507	0.440786	0.489725	0.478321	0.154534	0.386187	0.366576	0.335639	0.258363	0.274237
Rs159	0.419127	0.40445	0.396119	0.476233	0.614726	0.47697	0.457064	0.200009	0.597072	0.440396	0.385809	0.580403	0.324885	0.522353	0.527407	0.415515	0.402167	0.323182	0.509239	0.402997	0.566582	0.401026	0.455011	0.445795	0.429665	0.614726	0.45367	0.402997	0.514222	0.559616	0.26828	0.412997	0.34311	0.414766	0.582977	0.692976	0.595493	0.558179	0.271118	0.40445	0.368757	0.547349	0.377021	0.606596	0.30673	0.377249	0.404696	0.526781	0.395711
Rs160	0.422189	0.227585	0.18835	0.351599	0.442327	0.366985	0.322092	0.320715	0.617372	0.40433	0.404596	0.424239	0.249087	0.48103	0.303571	0.182322	0.275705	0.120311	0.402714	0.270799	0.236931	0.248563	0.292758	0.193348	0.222008	0.47218	0.520497	0.34876	0.376159	0.249377	0.421916	0.484768	0.425417	0.328504	0.601392	0.569717	0.31069	0.33024	0.40433	0.261624	0.198478	0.319175	0.442327	0.413339	0.280694	0.425876	0.248425	0.354725	0.275824
Rs161	0.47275	0.431404	0.344381	0.326256	0.341136	0.2573	0.356536	0.504946	0.36339	0.413976	0.331219	0.594558	0.246967	0.605828	0.710242	0.198478	0.45778	0.540936	0.268063	0.310016	0.475023	0.404638	0.2367	0.6446	0.405326	0.546988	0.35701	0.62847	0.538858	0.286648	0.371521	0.206336	0.476775	0.432499	0.364666	0.608448	0.234945	0.206336	0.651954	0.54263	0.651954	0.736493	0.430644	0.223005	0.440396	0.325511	0.347093	0.350829	0.34112
Rs162	0.367834	0.301795	0.266066	0.299302	0.465194	0.248129	0.327011	0.2931	0.393473	0.360353	0.252278	0.538946	0.166661	0.385152	0.440396	0.223144	0.324206	0.313473	0.257925	0.12856	0.318746	0.257925	0.28316	0.419127	0.302913	0.552206	0.401026	0.402997	0.351703	0.370374	0.254999	0.286245	0.34311	0.306552	0.437795	0.587615	0.26828	0.335035	0.343439	0.326488	0.294649	0.496434	0.256393	0.279383	0.332706	0.34985	0.347537	0.377249	0.340141
Rs163	0.40238	0.227425	0.197113	0.255499	0.364218	0.326701	0.308648	0.479888	0.556273	0.335639	0.261821	0.650368	0.172238	0.55227	0.489789	0.200671	0.488745	0.331897	0.274188	0.256004	0.374335	0.326832	0.21039	0.40238	0.413712	0.661469	0.326832	0.45383	0.413712	0.318369	0.401316	0.43496	0.315636	0.283584	0.423058	0.799944	0.271227	0.237134	0.413712	0.270167	0.289778	0.511657	0.413712	0.326701	0.426687	0.427208	0.404476	0.223088	0.244886
Rs164	0.249001	0.254486	0.251067	0.335337	0.303068	0.237188	0.213679	0.393708	0.380777	0.254486	0.246334	0.595869	0.173033	0.341356	0.38237	0.170273	0.225694	0.30643	0.249001	0.169128	0.321893	0.249001	0.234569	0.360226	0.331647	0.535512	0.360226	0.341356	0.331647	0.328415	0.197707	0.159227	0.227087	0.298413	0.433729	0.772646	0.245304	0.184545	0.24709	0.190109	0.292758	0.380733	0.284198	0.256799	0.269066	0.228842	0.205582	0.173272	0.146603
Rs165	0.479483	0.34985	0.20796	0.359714	0.333586	0.414766	0.404779	0.252655	0.38606	0.34985	0.323605	0.405057	0.298486	0.333586	0.386595	0.12536	0.261624	0.150623	0.316964	0.290409	0.250628	0.268174	0.204155	0.316964	0.181635	0.350712	0.422324	0.545301	0.39577	0.192059	0.442327	0.526781	0.395896	0.365251	0.49179	0.497646	0.331101	0.377249	0.332528	0.367725	0.290409	0.516516	0.404779	0.290409	0.289778	0.374335	0.284198	0.424207	0.334594
Rs166	0.436271	0.509336	0.281234	0.26311	0.35031	0.439275	0.393473	0.333586	0.410432	0.350829	0.320715	0.439432	0.314984	0.428271	0.376804	0.254026	0.419665	0.357639	0.317394	0.342179	0.411876	0.528703	0.300304	0.491841	0.475711	0.573453	0.471544	0.393473	0.393473	0.259885	0.330699	0.459043	0.308268	0.312917	0.512829	0.482781	0.330699	0.430872	0.238605	0.316964	0.385208	0.419665	0.269859	0.393473	0.377249	0.367725	0.366184	0.454736	0.386187
Rs167	0.373919	0.258465	0.246833	0.280069	0.29181	0.299513	0.357788	0.521703	0.445999	0.243481	0.258363	0.550692	0.232746	0.391894	0.449333	0.22805	0.365598	0.375708	0.284154	0.28368	0.349523	0.331782	0.163844	0.348601	0.437831	0.563744	0.331782	0.383764	0.357788	0.345979	0.454129	0.315802	0.349852	0.236931	0.445961	0.602284	0.330699	0.154534	0.324206	0.332573	0.349523	0.409563	0.410432	0.23716	0.313473	0.330617	0.274237	0.157345	0.194156
Rs168	0.46367	0.509336	0.281234	0.237134	0.277989	0.359232	0.44754	0.56316	0.373862	0.403473	0.320715	0.593583	0.259414	0.375627	0.718554	0.318403	0.339622	0.44465	0.226422	0.393473	0.385208	0.471544	0.150022	0.550682	0.597072	0.573453	0.366184	0.534551	0.44754	0.291634	0.493218	0.459043	0.441799	0.376886	0.325617	0.611993	0.190937	0.25319	0.467446	0.450495	0.526287	0.670979	0.44754	0.317487	0.495032	0.485508	0.455796	0.287682	0.386187
Rs169	0.280401	0.191354	0.323561	0.369909	0.297895	0.334594	0.271227	0.436345	0.39197	0.252356	0.211402	0.689663	0.205582	0.484	0.567262	0.227807	0.401981	0.383181	0.238117	0.288549	0.433731	0.28941	0.184003	0.400636	0.344119	0.507615	0.189327	0.412305	0.412305	0.341749	0.360226	0.161797	0.314984	0.460399	0.382452	0.554084	0.249001	0.128742	0.344119	0.242647	0.465479	0.401981	0.532171	0.210587	0.273293	0.180066	0.222897	0.115069	0.10408
Rs170	0.298486	0.426613	0.382139	0.320332	0.203827	0.381958	0.288384	0.428725	0.177159	0.256795	0.23488	0.624623	0.215911	0.338699	0.605102	0.17185	0.391465	0.405389	0.241327	0.370448	0.403238	0.241327	0.13228	0.646792	0.267548	0.338699	0.241327	0.472231	0.426613	0.325036	0.447836	0.199637	0.295194	0.443129	0.231226	0.502833	0.25368	0.145569	0.426613	0.338179	0.535812	0.580707	0.546339	0.140874	0.279287	0.204108	0.23488	0.170273	0.211309
Rs171	0.432233	0.2534	0.223088	0.347873	0.16754	0.237134	0.326701	0.335639	0.422741	0.5334	0.362669	0.73375	0.21039	0.308648	0.489789	0.264693	0.308648	0.291291	0.274188	0.230686	0.345348	0.382402	0.214165	0.373392	0.326701	0.587361	0.274188	0.256004	0.413712	0.267239	0.274188	0.326701	0.364626	0.394418	0.364218	0.926545	0.17655	0.177415	0.345221	0.243499	0.374335	0.45383	0.413712	0.272634	0.323787	0.405407	0.380662	0.255876	0.201808
Rs172	0.308451	0.418531	0.329861	0.44049	0.221942	0.396768	0.375765	0.348732	0.422861	0.300748	0.279313	0.537257	0.252927	0.355474	0.450279	0.260347	0.385003	0.33696	0.316854	0.405618	0.291208	0.372424	0.287424	0.393008	0.468138	0.652725	0.316854	0.173152	0.318607	0.25267	0.331659	0.309757	0.369238	0.421501	0.364021	0.550676	0.372696	0.337928	0.229714	0.328919	0.468138	0.502166	0.500928	0.384461	0.253093	0.271162	0.349944	0.28984	0.178614
Rs173	0.287271	0.277559	0.313896	0.349944	0.48202	0.473011	0.269412	0.323605	0.340413	0.304958	0.195745	0.473895	0.165362	0.389647	0.401316	0.21039	0.399254	0.232682	0.437045	0.269412	0.305089	0.219981	0.184508	0.378205	0.380637	0.305089	0.437045	0.48202	0.380637	0.327703	0.229714	0.496626	0.268035	0.530673	0.450271	0.563506	0.439035	0.342475	0.314304	0.241367	0.260237	0.441105	0.473011	0.35165	0.322881	0.244886	0.257571	0.351916	0.223144
Rs174	0.491715	0.296218	0.126958	0.40238	0.353662	0.495491	0.274914	0.469844	0.514222	0.404849	0.40433	0.477913	0.245251	0.456316	0.404849	0.170433	0.458145	0.0878177	0.369536	0.345531	0.179638	0.276446	0.155077	0.183414	0.208956	0.378354	0.419546	0.593368	0.532743	0.150012	0.493365	0.545928	0.528685	0.396119	0.456316	0.573346	0.32039	0.378874	0.683543	0.507528	0.289639	0.631121	0.532743	0.321434	0.377895	0.42394	0.236005	0.368371	0.358661
Rs175	0.291208	0.22816	0.242991	0.405399	0.459289	0.264174	0.300748	0.412526	0.468138	0.357906	0.298413	0.635105	0.291634	0.492079	0.431759	0.260853	0.673224	0.297401	0.355474	0.300748	0.348732	0.355474	0.338708	0.318607	0.300748	0.396768	0.355474	0.387759	0.418531	0.311783	0.415775	0.282227	0.320152	0.199025	0.346778	0.425313	0.372954	0.339385	0.441105	0.264174	0.195387	0.336966	0.366915	0.366915	0.28984	0.339938	0.276187	0.239573	0.222155
Rs176	0.37881	0.133521	0.0738244	0.456703	0.33696	0.438902	0.237038	0.32613	0.550638	0.255499	0.217065	0.527226	0.140732	0.470492	0.35892	0.133219	0.461018	0.117097	0.31629	0.226512	0.208868	0.20188	0.196509	0.139135	0.380662	0.49655	0.37881	0.460182	0.449655	0.162463	0.270874	0.486023	0.303399	0.39273	0.53429	0.601892	0.400085	0.33712	0.347873	0.380662	0.226512	0.488005	0.460182	0.326651	0.303399	0.347683	0.209843	0.346276	0.217065
Rs177	0.438227	0.322773	0.335834	0.317709	0.265147	0.388514	0.372086	0.65055	0.283923	0.458072	0.402714	0.684149	0.316079	0.356119	0.572483	0.236931	0.422262	0.386904	0.281022	0.257017	0.339724	0.325473	0.15916	0.490871	0.324458	0.430227	0.472077	0.718363	0.502139	0.256795	0.492724	0.262328	0.414161	0.541432	0.482871	0.568152	0.205042	0.240349	0.580886	0.396881	0.676196	0.563341	0.589151	0.235511	0.489007	0.316964	0.238462	0.268174	0.282562
Rs178	0.503755	0.30277	0.265716	0.307069	0.222197	0.345009	0.304766	0.573346	0.239725	0.42297	0.338659	0.51951	0.266323	0.337267	0.559456	0.163844	0.40445	0.296843	0.353662	0.281235	0.345009	0.306034	0.111325	0.421517	0.213794	0.313169	0.353662	0.675139	0.458916	0.247539	0.47697	0.31162	0.480973	0.55957	0.337267	0.554825	0.182171	0.153991	0.599901	0.489982	0.599901	0.61417	0.545928	0.171234	0.414231	0.296116	0.275705	0.270799	0.270799
Rs179	0.408494	0.45383	0.297566	0.320661	0.266416	0.441242	0.309013	0.444484	0.246967	0.224178	0.161268	0.525799	0.200412	0.291734	0.570454	0.250326	0.278421	0.33387	0.165584	0.309013	0.354231	0.361328	0.0672049	0.467335	0.335682	0.371776	0.165584	0.579304	0.428935	0.305382	0.437045	0.373392	0.413712	0.468047	0.241723	0.456999	0.219981	0.239861	0.354231	0.45383	0.472014	0.657911	0.450092	0.185399	0.374476	0.277155	0.2948	0.197113	0.287465
Rs180	0.510711	0.441195	0.325422	0.364218	0.36918	0.378103	0.439011	0.648722	0.429665	0.536753	0.424143	0.682186	0.363582	0.592323	0.775164	0.356675	0.526287	0.46426	0.289744	0.46641	0.404078	0.608198	0.21652	0.455141	0.584193	0.420473	0.336264	0.523568	0.615942	0.252927	0.512829	0.5069	0.550282	0.473606	0.36918	0.532423	0.254999	0.319689	0.640467	0.413796	0.607677	0.526287	0.584193	0.46641	0.48313	0.443753	0.414042	0.386595	0.296843
Rs181	0.625116	0.278673	0.405294	0.484	0.439921	0.599901	0.608448	0.369747	0.497554	0.414274	0.453069	0.451324	0.35088	0.337267	0.441673	0.263927	0.489007	0.297206	0.633247	0.404849	0.378874	0.260571	0.463004	0.321434	0.353556	0.439921	0.771397	0.641238	0.328863	0.38107	0.575928	0.414274	0.640037	0.664931	0.554331	0.523077	0.47697	0.559456	0.42297	0.489982	0.42297	0.536753	0.675139	0.337267	0.443219	0.433318	0.301681	0.443219	0.286015
Rs182	0.336783	0.433585	0.559407	0.393708	0.469314	0.514289	0.382303	0.519549	0.47011	0.473531	0.448724	0.527543	0.251067	0.564625	0.473531	0.404945	0.501859	0.447098	0.581575	0.373607	0.364757	0.345187	0.353414	0.508633	0.430766	0.469314	0.399254	0.25225	0.346208	0.488046	0.418182	0.451769	0.553451	0.672111	0.410474	0.653126	0.418182	0.421916	0.451769	0.328349	0.514289	0.525799	0.624922	0.500086	0.405006	0.35515	0.448724	0.480313	0.260283
Rs183	0.373607	0.247359	0.09997	0.446198	0.468866	0.44803	0.298967	0.38992	0.552479	0.331916	0.295937	0.552479	0.251314	0.373607	0.354828	0.240324	0.251097	0.0633759	0.309069	0.278131	0.228033	0.309069	0.203599	0.127117	0.353196	0.496297	0.4426	0.506607	0.44803	0.251229	0.261624	0.535518	0.265406	0.402498	0.809955	0.464028	0.326163	0.376571	0.342669	0.320927	0.288658	0.447984	0.320406	0.48577	0.332097	0.286431	0.203599	0.308283	0.331028
Rs184	0.46367	0.394925	0.332528	0.404188	0.483841	0.526287	0.317487	0.38623	0.545713	0.430872	0.405273	0.383862	0.206771	0.483841	0.300819	0.274437	0.392266	0.227585	0.417477	0.269859	0.285125	0.366184	0.384862	0.333617	0.293389	0.401603	0.471544	0.393473	0.367497	0.291634	0.43606	0.517883	0.470787	0.559207	0.605202	0.452928	0.330699	0.517883	0.496434	0.342282	0.309222	0.447836	0.367497	0.367497	0.34985	0.340326	0.338013	0.485508	0.386187
Rs185	0.352487	0.335834	0.204794	0.364218	0.32039	0.378103	0.288729	0.489657	0.402997	0.369699	0.286942	0.580403	0.315948	0.420473	0.599274	0.301105	0.294649	0.297206	0.161911	0.386367	0.352785	0.490415	0.192423	0.32839	0.494581	0.47454	0.289744	0.648732	0.439011	0.177411	0.35031	0.369699	0.352456	0.443753	0.447141	0.532423	0.198566	0.344381	0.328092	0.311141	0.430746	0.467446	0.36105	0.386367	0.453277	0.332528	0.251523	0.281234	0.246833
Rs186	0.563392	0.413832	0.303995	0.388727	0.239538	0.333144	0.439048	0.51335	0.396779	0.475023	0.447836	0.572483	0.255663	0.527221	0.651954	0.184498	0.439808	0.431849	0.342424	0.389037	0.405465	0.388944	0.221573	0.507822	0.389037	0.584379	0.437734	0.51909	0.51909	0.238561	0.456203	0.2573	0.542337	0.528206	0.499822	0.649641	0.265147	0.194121	0.727049	0.643407	0.76214	0.781557	0.547261	0.210789	0.394732	0.309222	0.329521	0.359232	0.324206
Rs187	0.466002	0.40392	0.340141	0.414498	0.486725	0.530398	0.315802	0.39507	0.550692	0.43209	0.415315	0.383917	0.211655	0.486725	0.298559	0.270593	0.392613	0.222944	0.418562	0.275415	0.282562	0.365918	0.383726	0.33247	0.291109	0.402167	0.474132	0.393764	0.367095	0.291634	0.437734	0.521703	0.473072	0.564338	0.611888	0.463897	0.329521	0.521703	0.508174	0.341003	0.307255	0.449771	0.367095	0.367095	0.348307	0.338405	0.335639	0.497838	0.385462
Rs188	0.475585	0.361631	0.351226	0.391627	0.337267	0.47854	0.353556	0.432823	0.395675	0.196551	0.188377	0.61482	0.250891	0.387277	0.559456	0.263927	0.351806	0.405057	0.260571	0.313169	0.396302	0.260571	0.156787	0.532743	0.281235	0.585103	0.217086	0.641238	0.458916	0.40487	0.4214	0.241003	0.541597	0.46426	0.387277	0.501651	0.368757	0.21853	0.353556	0.519835	0.568152	0.683163	0.458916	0.171234	0.38606	0.296116	0.215168	0.18539	0.260697
Rs189	0.458145	0.305866	0.429155	0.360554	0.303995	0.51066	0.394592	0.370778	0.469135	0.394592	0.389133	0.536676	0.28023	0.556146	0.366866	0.339913	0.53392	0.341338	0.556146	0.329126	0.435414	0.314984	0.332488	0.469135	0.303995	0.406087	0.314984	0.281263	0.545157	0.4168	0.469135	0.435414	0.466209	0.504252	0.469135	0.493804	0.556146	0.343606	0.406087	0.477974	0.545157	0.489469	0.522426	0.406087	0.28023	0.346574	0.291666	0.402833	0.24249
Rs190	0.51951	0.342052	0.261624	0.378585	0.269498	0.275412	0.334597	0.504378	0.39577	0.501651	0.443077	0.46426	0.249001	0.51951	0.612342	0.181453	0.480807	0.395171	0.335834	0.387241	0.405465	0.387127	0.225741	0.4051	0.387241	0.541432	0.441195	0.423649	0.471798	0.227368	0.461937	0.269498	0.504378	0.477235	0.51066	0.583208	0.240524	0.172975	0.749071	0.578441	0.702322	0.674277	0.501651	0.236959	0.319175	0.266531	0.303068	0.346574	0.336047
Rs191	0.23836	0.286813	0.469316	0.309069	0.425876	0.217524	0.325737	0.38237	0.405414	0.384578	0.399254	0.591825	0.274091	0.606085	0.81482	0.25368	0.365251	0.546339	0.274437	0.308093	0.538128	0.274437	0.282035	0.606085	0.365251	0.425876	0.385662	0.384578	0.270167	0.401717	0.470004	0.0861426	0.402624	0.49655	0.405414	0.757064	0.223144	0.0526803	0.585248	0.232746	0.490415	0.266402	0.585248	0.153942	0.241327	0.162865	0.22141	0.241327	0.20188
Rs192	0.463171	0.338405	0.270167	0.241327	0.212834	0.348114	0.385809	0.328504	0.394386	0.277596	0.248425	0.615385	0.208868	0.453996	0.635796	0.17537	0.327703	0.404945	0.231018	0.312917	0.376285	0.331101	0.175211	0.558481	0.33024	0.618299	0.231018	0.50717	0.366985	0.248701	0.464357	0.258363	0.436186	0.364167	0.236931	0.672736	0.241213	0.137735	0.385809	0.395564	0.435126	0.477235	0.50717	0.0910099	0.343972	0.393607	0.370876	0.248425	0.232746
Rs193	0.274803	0.416197	0.391802	0.287296	0.341494	0.252072	0.284862	0.261048	0.271162	0.508005	0.419165	0.468455	0.325036	0.450694	0.783922	0.321137	0.423943	0.390579	0.352484	0.401717	0.550565	0.423943	0.221508	0.584285	0.296356	0.263567	0.223272	0.365349	0.427962	0.405006	0.352484	0.252072	0.273096	0.364257	0.263567	0.605376	0.285792	0.165737	0.450694	0.294949	0.467183	0.439457	0.390222	0.296356	0.203253	0.209721	0.360273	0.419165	0.315081
Rs194	0.363945	0.326191	0.326651	0.33393	0.29593	0.286584	0.29593	0.356963	0.303225	0.366672	0.22252	0.561965	0.174865	0.426465	0.421501	0.236606	0.386074	0.368316	0.372954	0.204346	0.407945	0.314114	0.217065	0.459255	0.345424	0.385542	0.372954	0.276934	0.440735	0.319451	0.312571	0.324918	0.306189	0.494513	0.417291	0.58382	0.373196	0.204346	0.474636	0.388712	0.474636	0.386074	0.345424	0.258413	0.237038	0.215759	0.283145	0.380662	0.22252
Rs195	0.265739	0.432499	0.453277	0.297895	0.328092	0.387127	0.369699	0.573181	0.548655	0.352456	0.414042	0.56316	0.268035	0.70946	0.61482	0.308093	0.422324	0.507547	0.32039	0.378103	0.558978	0.47454	0.271227	0.615942	0.536753	0.607677	0.32039	0.395675	0.272061	0.348237	0.385208	0.278348	0.501651	0.619039	0.430746	0.770108	0.151593	0.209355	0.369699	0.222978	0.528206	0.479483	0.536753	0.369699	0.494669	0.286942	0.364218	0.271525	0.202733
Rs196	0.261579	0.25133	0.378806	0.25458	0.373415	0.301186	0.301186	0.301645	0.258345	0.322056	0.246645	0.545827	0.204108	0.341667	0.376494	0.238372	0.38294	0.299127	0.329765	0.169817	0.491955	0.270925	0.210485	0.449631	0.214175	0.310895	0.329765	0.363706	0.301186	0.377591	0.328679	0.232444	0.291119	0.426287	0.310895	0.589327	0.215355	0.222343	0.331958	0.25133	0.322056	0.309069	0.301186	0.281042	0.312114	0.25814	0.210485	0.249594	0.215873
Rs197	0.28473	0.331239	0.311644	0.371497	0.330102	0.4526	0.38726	0.341356	0.483069	0.275669	0.280055	0.569909	0.182322	0.512423	0.476043	0.215759	0.366819	0.260853	0.395956	0.369401	0.461774	0.338797	0.200671	0.358272	0.430026	0.470783	0.28473	0.349423	0.340413	0.321938	0.396768	0.430026	0.274489	0.459214	0.408263	0.679954	0.35515	0.303068	0.284843	0.266323	0.312242	0.473895	0.439035	0.369401	0.301335	0.301335	0.372428	0.331188	0.179582
Rs198	0.261558	0.321938	0.234842	0.345628	0.321252	0.334597	0.249793	0.27121	0.4508	0.386164	0.292558	0.486265	0.164303	0.321252	0.513997	0.266531	0.284884	0.214705	0.344512	0.309203	0.261558	0.273053	0.307052	0.344512	0.398213	0.439035	0.344512	0.261558	0.203842	0.307928	0.200505	0.358992	0.348171	0.476004	0.370757	0.609274	0.206361	0.309203	0.260489	0.158706	0.237744	0.45416	0.284884	0.333017	0.281917	0.238411	0.390434	0.348171	0.193723
Rs199	0.321893	0.24709	0.290808	0.440698	0.341356	0.292758	0.24709	0.292758	0.443254	0.292758	0.234569	0.57188	0.198679	0.420851	0.5058	0.174865	0.310251	0.261821	0.303068	0.284198	0.414119	0.249001	0.227368	0.35088	0.230131	0.433729	0.197707	0.331647	0.392272	0.432864	0.260938	0.21052	0.290808	0.428725	0.380733	0.58754	0.245304	0.149126	0.312369	0.237188	0.321893	0.492642	0.45681	0.256799	0.200671	0.200671	0.270799	0.146603	0.150012
Rs200	0.402997	0.471461	0.386773	0.39197	0.566582	0.301795	0.440396	0.299933	0.367095	0.451324	0.337228	0.441799	0.435257	0.505958	0.674467	0.326163	0.282562	0.424883	0.437795	0.69171	0.61417	0.493365	0.402959	0.514222	0.468567	0.4214	0.552206	0.535811	0.468567	0.369021	0.557058	0.377781	0.28425	0.330617	0.535811	0.42429	0.579098	0.369085	0.468567	0.442474	0.431849	0.368257	0.335035	0.468567	0.247196	0.313473	0.299302	0.44465	0.385809
Rs201	0.160353	0.195241	0.206771	0.309908	0.409486	0.204415	0.213424	0.269316	0.312242	0.344119	0.245122	0.509945	0.165362	0.430489	0.567262	0.200412	0.369401	0.272347	0.206873	0.334468	0.391627	0.306956	0.234133	0.29826	0.42148	0.430489	0.306956	0.280401	0.334468	0.216587	0.360659	0.235905	0.0960439	0.228014	0.430489	0.557738	0.321252	0.210587	0.325294	0.17637	0.271227	0.260237	0.316079	0.334468	0.146659	0.18636	0.251067	0.284046	0.201808
Rs202	0.542168	0.43912	0.393634	0.365349	0.282657	0.222897	0.484964	0.43912	0.38237	0.43912	0.335337	0.649641	0.309691	0.542168	0.617372	0.215911	0.426498	0.582876	0.321746	0.311644	0.474211	0.38237	0.316558	0.793483	0.331188	0.649641	0.38237	0.484964	0.460399	0.331028	0.38237	0.195498	0.617372	0.479573	0.446909	0.582876	0.321746	0.195498	0.569599	0.617372	0.831963	0.692201	0.351433	0.244176	0.416676	0.335337	0.316558	0.335337	0.302547
Rs203	0.394175	0.387575	0.401717	0.229923	0.419165	0.352484	0.275324	0.376586	0.251097	0.461683	0.379143	0.410243	0.163231	0.419165	0.363237	0.193764	0.338784	0.32839	0.394175	0.296546	0.350172	0.327483	0.243622	0.465634	0.275324	0.307072	0.394175	0.225009	0.363237	0.402306	0.345979	0.408855	0.307593	0.470492	0.445223	0.427962	0.261624	0.254044	0.522184	0.285792	0.472436	0.396158	0.408855	0.329335	0.240307	0.240307	0.341403	0.33004	0.282603
Rs204	0.267302	0.303068	0.38237	0.173272	0.311398	0.349423	0.358272	0.411505	0.405618	0.2322	0.309908	0.480313	0.189176	0.465128	0.494564	0.21039	0.43639	0.467452	0.301681	0.276034	0.37841	0.201597	0.269066	0.563568	0.395956	0.55502	0.412907	0.38726	0.250059	0.418413	0.476834	0.206882	0.321893	0.281263	0.28473	0.639132	0.299904	0.258175	0.293853	0.258175	0.38726	0.492079	0.546325	0.258755	0.351599	0.341497	0.298919	0.190109	0.179582
Rs205	0.512765	0.287682	0.501314	0.450271	0.594112	0.54639	0.440527	0.441833	0.536753	0.396615	0.403238	0.469365	0.331239	0.44893	0.37064	0.267494	0.558978	0.434044	0.818146	0.337873	0.413858	0.247602	0.525799	0.457195	0.440527	0.422262	0.898189	0.563341	0.413858	0.547567	0.404078	0.379336	0.432823	0.621517	0.658651	0.532086	0.640467	0.459378	0.431979	0.336472	0.379336	0.413796	0.650247	0.362565	0.37738	0.341003	0.300163	0.442327	0.295024
Rs206	0.388083	0.507841	0.245471	0.369509	0.331028	0.388185	0.346722	0.263992	0.487087	0.432133	0.401778	0.559456	0.243436	0.405136	0.641854	0.292506	0.272688	0.315727	0.153267	0.476775	0.440829	0.588585	0.352327	0.388083	0.533934	0.736493	0.371521	0.262035	0.346722	0.203412	0.422262	0.338175	0.273001	0.341702	0.485179	0.757921	0.200691	0.37949	0.371415	0.296532	0.414161	0.405311	0.322625	0.371415	0.235947	0.298559	0.420239	0.313975	0.339951
Rs207	0.409486	0.279025	0.404596	0.349168	0.493009	0.382452	0.452251	0.191354	0.430026	0.373106	0.291291	0.411505	0.189176	0.493009	0.465479	0.217347	0.420851	0.341497	0.418182	0.334468	0.412305	0.255663	0.298413	0.409486	0.362639	0.263435	0.478806	0.343478	0.362639	0.327703	0.439035	0.507615	0.424207	0.437734	0.430489	0.661358	0.503573	0.344119	0.42148	0.279025	0.219933	0.303068	0.51679	0.307069	0.222645	0.323561	0.280055	0.384185	0.239003
Rs208	0.336357	0.178526	0.172975	0.314304	0.257475	0.335834	0.204619	0.360572	0.517883	0.378431	0.292506	0.50064	0.165381	0.458145	0.46067	0.22805	0.422324	0.262364	0.32039	0.295591	0.361152	0.27387	0.297895	0.312259	0.395675	0.674368	0.32039	0.404078	0.449742	0.323842	0.285125	0.311141	0.245968	0.367725	0.458145	0.81093	0.285125	0.231828	0.272061	0.343606	0.311141	0.540107	0.422343	0.319689	0.306552	0.376886	0.336047	0.261624	0.286942
Rs209	0.449655	0.182038	0.217065	0.324129	0.255499	0.314894	0.149199	0.416676	0.380475	0.381585	0.274382	0.427913	0.135884	0.33712	0.570827	0.175468	0.47527	0.312375	0.295879	0.33712	0.381585	0.237038	0.218769	0.316124	0.33712	0.47527	0.295879	0.438902	0.427913	0.237229	0.425091	0.204769	0.405182	0.418124	0.305371	0.681098	0.237038	0.211026	0.523763	0.47929	0.490784	0.635613	0.35892	0.204769	0.291634	0.300028	0.233263	0.217065	0.267239
Rs210	0.47011	0.433731	0.304883	0.536824	0.430489	0.541517	0.42148	0.363582	0.5058	0.353465	0.273293	0.678947	0.338179	0.534649	0.465479	0.276187	0.496626	0.342424	0.418182	0.461261	0.412305	0.478806	0.349168	0.501859	0.430489	0.708121	0.306956	0.550691	0.585783	0.432499	0.215891	0.402959	0.296715	0.543095	0.559701	0.436345	0.48202	0.433731	0.280401	0.455955	0.51679	0.795544	0.452251	0.484	0.405407	0.302281	0.43912	0.342887	0.332134
Rs211	0.716947	0.60891	0.39625	0.326832	0.247602	0.658651	0.512765	0.423284	0.46641	0.267255	0.305126	0.567525	0.219933	0.362671	0.362565	0.33024	0.352785	0.42429	0.354448	0.430527	0.476329	0.508598	0.234704	0.528895	0.430527	0.708947	0.354448	0.354541	0.404551	0.382139	0.592323	0.525084	0.600214	0.405465	0.362671	0.720506	0.36918	0.362565	0.346276	0.54639	0.44893	0.575928	0.484594	0.217965	0.442474	0.522562	0.375067	0.227098	0.315027
Rs212	0.378874	0.293761	0.290409	0.273349	0.296218	0.336313	0.263992	0.462452	0.245471	0.369747	0.307069	0.492305	0.202184	0.42297	0.573346	0.142564	0.386904	0.33024	0.289639	0.296218	0.378756	0.337267	0.100335	0.404849	0.287523	0.396302	0.289639	0.537381	0.387606	0.233657	0.40445	0.255142	0.369747	0.50717	0.396302	0.587615	0.208705	0.145141	0.559456	0.423814	0.582355	0.540936	0.528685	0.153991	0.322092	0.188377	0.269412	0.301681	0.250388
Rs213	0.600214	0.414303	0.289709	0.42754	0.241162	0.343606	0.405425	0.5871	0.471798	0.541432	0.493009	0.545651	0.291573	0.537694	0.701985	0.215391	0.462624	0.424143	0.354018	0.460994	0.423649	0.459378	0.229714	0.423284	0.460994	0.624154	0.459378	0.498991	0.550607	0.208752	0.541432	0.30277	0.5871	0.562797	0.528844	0.646384	0.222978	0.191159	0.847298	0.665617	0.797467	0.770108	0.582355	0.255142	0.403238	0.347668	0.349423	0.364757	0.382402
Rs214	0.310343	0.299933	0.297206	0.321893	0.326488	0.16918	0.2931	0.342052	0.323877	0.433464	0.299302	0.637375	0.284198	0.460019	0.769937	0.222645	0.299418	0.487937	0.225656	0.351806	0.442474	0.368757	0.213679	0.558179	0.423153	0.51886	0.318746	0.431849	0.480311	0.291053	0.282562	0.147674	0.218438	0.338405	0.489007	0.638087	0.316964	0.0767895	0.460019	0.290759	0.563835	0.39507	0.395754	0.222482	0.203488	0.169856	0.277559	0.267494	0.231867
Rs215	0.276934	0.27706	0.368709	0.259885	0.519074	0.3359	0.153053	0.431211	0.261579	0.440735	0.403811	0.418864	0.210485	0.426465	0.421501	0.25814	0.588527	0.391465	0.435475	0.267759	0.231014	0.258544	0.33393	0.426465	0.315571	0.267759	0.435475	0.29593	0.345424	0.348171	0.255413	0.258413	0.33696	0.368316	0.324918	0.358399	0.329765	0.366672	0.483982	0.211781	0.440735	0.354326	0.407945	0.376196	0.244746	0.215759	0.27165	0.403811	0.22252
Rs216	0.373392	0.307468	0.334314	0.426613	0.485579	0.317177	0.413712	0.479888	0.721413	0.394479	0.415971	0.611148	0.46428	0.55227	0.43496	0.382139	0.477756	0.416455	0.503762	0.393205	0.43496	0.441242	0.414564	0.373392	0.476233	0.70069	0.570454	0.299302	0.413712	0.469691	0.443077	0.307468	0.415349	0.234133	0.70069	0.538779	0.530527	0.307468	0.326701	0.217524	0.317177	0.252356	0.413712	0.476233	0.313034	0.362669	0.267548	0.35364	0.273057
Rs217	0.427929	0.305126	0.277596	0.332982	0.447836	0.272661	0.305901	0.34876	0.607073	0.610241	0.457625	0.412088	0.283584	0.506676	0.422189	0.364167	0.228152	0.25797	0.330699	0.357194	0.489725	0.553843	0.314984	0.273779	0.383862	0.419665	0.381993	0.365598	0.46842	0.295937	0.345187	0.489725	0.331101	0.366184	0.670979	0.77245	0.245103	0.313975	0.383862	0.255115	0.272661	0.30226	0.257111	0.529044	0.294047	0.366576	0.325737	0.328504	0.356675
Rs218	0.461078	0.303949	0.174153	0.320152	0.423241	0.503844	0.331993	0.376478	0.548379	0.395711	0.45681	0.385809	0.30015	0.423241	0.376886	0.223088	0.311991	0.105361	0.385216	0.306018	0.18539	0.234934	0.24709	0.234934	0.18539	0.423241	0.499627	0.503844	0.358661	0.197497	0.462078	0.549861	0.60933	0.436186	0.544601	0.487937	0.245014	0.424698	0.463897	0.36754	0.296843	0.539205	0.473072	0.423241	0.415315	0.456999	0.24709	0.425251	0.372736
Rs219	0.478148	0.314304	0.282035	0.540726	0.303944	0.504614	0.293842	0.368316	0.558815	0.458145	0.369021	0.422189	0.269944	0.514516	0.402218	0.288137	0.491955	0.245152	0.487857	0.458145	0.263989	0.293701	0.308925	0.313845	0.293842	0.433155	0.354326	0.366464	0.654856	0.229977	0.4426	0.423054	0.415566	0.539885	0.622397	0.380475	0.568917	0.314304	0.532253	0.521944	0.494513	0.57634	0.504614	0.366464	0.22141	0.291053	0.254892	0.417438	0.308925
Rs220	0.461078	0.252655	0.10516	0.45681	0.367671	0.526418	0.331993	0.348307	0.617372	0.36754	0.403508	0.475422	0.231226	0.512853	0.405057	0.190819	0.366058	0.0517741	0.332573	0.256007	0.222735	0.282562	0.220421	0.137291	0.256007	0.482081	0.385216	0.602284	0.503844	0.197497	0.347668	0.583763	0.475799	0.480313	0.611293	0.663828	0.295024	0.454551	0.434044	0.517072	0.271525	0.682306	0.473072	0.423241	0.415315	0.435777	0.262994	0.489789	0.383726
Rs221	0.349852	0.330617	0.184255	0.479217	0.423241	0.559207	0.306018	0.507547	0.483841	0.36754	0.446246	0.539205	0.231226	0.452228	0.517072	0.228477	0.483841	0.107631	0.332573	0.38606	0.18539	0.234934	0.274489	0.249769	0.2807	0.452228	0.385216	0.482081	0.38606	0.296266	0.403238	0.526418	0.46609	0.559616	0.544601	0.456188	0.245014	0.463897	0.494669	0.395711	0.376886	0.804908	0.503844	0.482081	0.425417	0.356475	0.320152	0.335639	0.324885
Rs222	0.394018	0.212834	0.223144	0.38237	0.47218	0.433318	0.246106	0.376285	0.44276	0.395155	0.332982	0.486759	0.249087	0.366619	0.277596	0.212561	0.364757	0.120311	0.459872	0.175488	0.236931	0.202043	0.264587	0.216337	0.198478	0.385168	0.585036	0.40433	0.40433	0.278713	0.31069	0.424143	0.366576	0.480313	0.636483	0.510826	0.31069	0.33024	0.40433	0.236931	0.270799	0.319175	0.463171	0.385168	0.318403	0.308093	0.184545	0.354725	0.275824
Rs223	0.593368	0.405425	0.39577	0.574793	0.495491	0.632691	0.458916	0.405425	0.468567	0.498832	0.473531	0.641238	0.293722	0.495491	0.287523	0.327703	0.648072	0.27524	0.570726	0.378874	0.396302	0.456316	0.51679	0.345531	0.281235	0.683543	0.511886	0.304766	0.516075	0.466943	0.4214	0.441673	0.451985	0.568917	0.649641	0.523077	0.535811	0.657896	0.47854	0.582355	0.537381	0.58138	0.487087	0.516075	0.368371	0.38606	0.40238	0.493942	0.366058
Rs224	0.479573	0.888006	0.569552	0.539205	0.479573	0.455178	0.479573	0.271934	0.136872	0.455178	0.32839	0.359732	0.343606	0.271934	0.622232	0.293564	0.271934	0.402498	0.502833	0.559616	0.535221	0.502833	0.269498	0.741937	0.359732	0.234569	0.502833	0.669887	0.359732	0.251229	0.359732	0.405465	0.691896	1.15268	0.271934	0.429531	0.359732	0.455178	0.741937	0.770223	0.622232	0.965081	0.535221	0.186914	0.455178	0.194858	0.373919	0.691896	0.596585
Rs225	0.438227	0.322773	0.441195	0.458788	0.309599	0.643407	0.422097	0.55524	0.354541	0.331321	0.322671	0.585709	0.324928	0.456203	0.458072	0.270799	0.634711	0.360236	0.583303	0.324458	0.388514	0.19764	0.328236	0.546441	0.324458	0.356119	0.526144	0.718363	0.502139	0.439962	0.492724	0.431404	0.468228	0.797142	0.51027	0.507528	0.529745	0.405429	0.388514	0.476924	0.551033	0.658651	0.619923	0.324458	0.489007	0.368257	0.26256	0.422324	0.258465
Rs226	0.51827	0.299243	0.469365	0.428935	0.597281	0.293204	0.53031	0.290547	0.512765	0.635003	0.459872	0.413858	0.343478	0.538441	0.701694	0.312917	0.533488	0.442474	0.643927	0.53031	0.551033	0.371993	0.439461	0.464203	0.422097	0.265147	0.583303	0.396779	0.422097	0.476329	0.492724	0.485471	0.525387	0.51066	0.456203	0.666592	0.492724	0.30779	0.551033	0.299243	0.316194	0.370969	0.619923	0.422097	0.254167	0.368257	0.449771	0.422324	0.282562
Rs227	0.425091	0.187588	0.102654	0.404148	0.449655	0.294381	0.187588	0.211026	0.523763	0.502021	0.343375	0.392835	0.242159	0.414564	0.336189	0.167054	0.269376	0.0779615	0.358399	0.244746	0.233757	0.295879	0.261048	0.144274	0.176598	0.369909	0.358399	0.46428	0.541241	0.148917	0.249594	0.416676	0.247836	0.312375	0.603806	0.51851	0.312114	0.303399	0.438902	0.32613	0.215759	0.391671	0.316124	0.380662	0.192059	0.321271	0.274382	0.48235	0.366408
Rs228	0.459043	0.218088	0.134872	0.444966	0.422324	0.37738	0.308268	0.297206	0.647095	0.461937	0.404188	0.433318	0.225694	0.479483	0.452928	0.212634	0.357769	0.0732803	0.385208	0.359561	0.274726	0.333915	0.279025	0.102368	0.308268	0.394925	0.439275	0.359561	0.441799	0.187212	0.459872	0.545301	0.434407	0.395896	0.517883	0.645698	0.297354	0.341702	0.522562	0.315727	0.168506	0.357769	0.540107	0.394925	0.232653	0.384862	0.306424	0.384862	0.300304
Rs229	0.427929	0.331101	0.242754	0.503036	0.537448	0.459872	0.498273	0.40433	0.755493	0.348647	0.264335	0.555929	0.314984	0.476823	0.511801	0.344623	0.447836	0.263927	0.553843	0.46842	0.375315	0.43606	0.314984	0.250248	0.662576	0.635888	0.493218	0.411261	0.383862	0.368411	0.437734	0.654028	0.433318	0.384862	0.537448	0.608953	0.553843	0.422189	0.322671	0.357769	0.179571	0.449771	0.439432	0.498273	0.366576	0.478036	0.479888	0.425417	0.328504
Rs230	0.592379	0.388514	0.328092	0.60495	0.555391	0.660357	0.465023	0.485179	0.718363	0.651954	0.569197	0.701694	0.389194	0.584379	0.589433	0.56749	0.819297	0.301795	0.489028	0.576249	0.430783	0.600253	0.427425	0.268592	0.547261	0.645004	0.388944	0.341409	0.806772	0.349168	0.692591	0.718645	0.51335	0.387127	0.645004	0.616852	0.692591	0.684744	0.628609	0.643407	0.510826	0.580886	0.547261	0.735313	0.318746	0.557058	0.496575	0.588807	0.516578
Rs231	0.347887	0.357769	0.242754	0.314984	0.476823	0.430885	0.281208	0.34876	0.419021	0.288658	0.308093	0.346208	0.201346	0.476823	0.288658	0.143841	0.336783	0.247661	0.281909	0.257111	0.248563	0.381993	0.270167	0.297876	0.383862	0.419665	0.43606	0.498273	0.305901	0.184163	0.245103	0.451177	0.270799	0.338013	0.537448	0.50717	0.293893	0.511801	0.272661	0.263965	0.248563	0.469314	0.281208	0.392266	0.376285	0.284338	0.297566	0.415515	0.264335
Rs232	0.453961	0.234934	0.376886	0.425251	0.628283	0.349523	0.437831	0.298559	0.535611	0.508174	0.284338	0.627484	0.304883	0.532972	0.538946	0.297566	0.559095	0.44465	0.548847	0.28368	0.457737	0.331782	0.467526	0.51112	0.466002	0.445961	0.611367	0.555614	0.524842	0.404779	0.281909	0.393764	0.323877	0.443895	0.662184	0.602284	0.642182	0.421163	0.402167	0.307255	0.375499	0.339622	0.307778	0.466002	0.313473	0.330617	0.356475	0.475799	0.294239
Rs233	0.426562	0.332573	0.434044	0.280069	0.851426	0.457737	0.437831	0.40392	0.514941	0.508174	0.487937	0.550692	0.33387	0.662184	0.393764	0.325737	0.591885	0.404696	0.548847	0.383764	0.457737	0.381793	0.467526	0.482132	0.437831	0.532972	0.749517	0.410432	0.555614	0.455178	0.454129	0.393764	0.349852	0.302816	0.771383	0.331993	0.57549	0.508174	0.579098	0.332573	0.457737	0.304203	0.410432	0.620152	0.340141	0.386187	0.274237	0.475799	0.46609
Rs234	0.693017	0.474741	0.46641	0.514775	0.535485	0.668622	0.555526	0.611227	0.62847	0.456619	0.485088	0.819441	0.289528	0.622497	0.223005	0.339951	0.718645	0.440396	0.523961	0.219054	0.41373	0.471317	0.435689	0.543485	0.397302	0.823167	0.638371	0.421994	0.676887	0.498072	0.438774	0.567845	0.580455	0.5069	0.823167	0.657906	0.546988	0.597698	0.606102	0.619923	0.606102	0.753736	0.614366	0.527355	0.574847	0.504698	0.390429	0.420141	0.466002
Rs235	0.536753	0.213969	0.405057	0.314304	0.498353	0.245968	0.432499	0.405465	0.50064	0.674963	0.496105	0.42394	0.329861	0.567525	0.532423	0.270167	0.522562	0.435126	0.515304	0.378431	0.541432	0.458145	0.360226	0.395675	0.378431	0.263513	0.575928	0.4051	0.4051	0.321271	0.540107	0.480807	0.453277	0.405273	0.558978	0.741529	0.368257	0.269498	0.550282	0.213969	0.352456	0.181635	0.46067	0.4051	0.276841	0.366985	0.353465	0.356883	0.205994
Rs236	0.404214	0.61776	0.648722	0.512612	0.529745	0.602962	0.493444	0.459532	0.448186	0.533934	0.511801	0.554937	0.42148	0.558732	0.476775	0.484768	0.718634	0.471461	0.733671	0.521615	0.57219	0.545619	0.555929	0.566732	0.521615	0.323893	0.66698	0.248321	0.413401	0.502833	0.570726	0.626307	0.516691	0.665954	0.396213	0.657896	0.570726	0.626307	0.485179	0.314078	0.379818	0.337267	0.675765	0.611227	0.369085	0.413629	0.470928	0.629852	0.323877
Rs237	0.35754	0.466476	0.404078	0.50651	0.527221	0.223144	0.389037	0.45778	0.474741	0.448355	0.314304	0.513642	0.333624	0.527221	0.718645	0.357769	0.339724	0.489007	0.342424	0.51909	0.483427	0.543095	0.399254	0.42986	0.547261	0.42186	0.437734	0.341409	0.295947	0.403238	0.51027	0.422379	0.431112	0.387127	0.37307	0.792742	0.404909	0.324741	0.483427	0.293204	0.265703	0.293204	0.41373	0.389037	0.271118	0.309222	0.437734	0.333915	0.206423
Rs238	0.56736	0.245014	0.310614	0.363723	0.437734	0.238462	0.347093	0.286015	0.437482	0.643927	0.336472	0.545402	0.206251	0.355496	0.441075	0.325737	0.428935	0.425251	0.51297	0.247009	0.392613	0.345916	0.405248	0.474987	0.40116	0.591885	0.454129	0.295799	0.550692	0.456703	0.198583	0.356518	0.366058	0.385054	0.496575	0.635219	0.416898	0.303874	0.392613	0.403238	0.479624	0.598526	0.382165	0.429331	0.300905	0.405414	0.480313	0.405414	0.36546
Rs239	0.404214	0.314078	0.352456	0.391251	0.651106	0.485179	0.2703	0.459532	0.571605	0.371415	0.313975	0.378874	0.280401	0.447507	0.322625	0.252278	0.361959	0.325251	0.60446	0.339293	0.307498	0.339767	0.401778	0.308903	0.493444	0.421531	0.733671	0.466045	0.36339	0.40487	0.403672	0.504946	0.305382	0.442811	0.683895	0.559456	0.570726	0.422708	0.405136	0.245085	0.21855	0.244176	0.439376	0.388083	0.2931	0.308268	0.303874	0.441799	0.323877
Rs240	0.383764	0.367671	0.358016	0.242647	0.516578	0.594937	0.315802	0.503844	0.550692	0.307255	0.385462	0.356518	0.242647	0.547349	0.43209	0.280902	0.611888	0.328304	0.532972	0.421163	0.307255	0.26828	0.296715	0.437831	0.393764	0.547349	0.474132	0.34112	0.267012	0.417438	0.559095	0.499627	0.568382	0.465897	0.375499	0.424698	0.365918	0.376521	0.412615	0.265017	0.358548	0.510396	0.708845	0.393764	0.405465	0.395564	0.394479	0.348307	0.338405
Rs241	0.427929	0.255115	0.357639	0.275824	0.476823	0.225033	0.331219	0.331101	0.336783	0.54355	0.375561	0.500086	0.216777	0.289612	0.451177	0.315636	0.354904	0.375153	0.493218	0.23358	0.383862	0.281909	0.314984	0.400531	0.357194	0.419665	0.553843	0.218994	0.411261	0.510513	0.329521	0.322671	0.296116	0.320138	0.506676	0.608953	0.399254	0.225033	0.430885	0.279808	0.375315	0.31257	0.383862	0.331219	0.193964	0.311006	0.354725	0.356675	0.318403
Rs242	0.293389	0.13815	0.287682	0.334594	0.411876	0.292271	0.276721	0.42394	0.478321	0.342282	0.310614	0.48103	0.184545	0.526287	0.413629	0.208352	0.375315	0.258363	0.35031	0.207728	0.316964	0.210548	0.26311	0.293389	0.276721	0.309222	0.401603	0.376804	0.276721	0.300028	0.365598	0.359561	0.452928	0.473606	0.467446	0.702671	0.265514	0.212958	0.368257	0.159656	0.244643	0.248563	0.496434	0.325511	0.303949	0.268072	0.19765	0.218061	0.0928906
Rs243	0.514941	0.357769	0.414797	0.563506	0.569197	0.402714	0.560793	0.305126	0.448009	0.645333	0.436186	0.746946	0.460399	0.569197	0.645333	0.469787	0.564625	0.346165	0.43606	0.498273	0.529044	0.618381	0.469135	0.427929	0.357194	0.314304	0.381993	0.447836	0.593583	0.381368	0.437734	0.489725	0.463171	0.553451	0.569197	0.44465	0.517037	0.489725	0.520497	0.357769	0.459872	0.26256	0.383862	0.560793	0.294047	0.338405	0.354725	0.478036	0.264335
Rs244	0.411261	0.433318	0.233045	0.515902	0.402714	0.610241	0.339951	0.475422	0.5017	0.376159	0.404596	0.65374	0.350465	0.297354	0.270799	0.373659	0.401778	0.178248	0.476823	0.48103	0.305126	0.419665	0.303995	0.281208	0.366619	0.654028	0.537448	0.394018	0.48103	0.354737	0.365214	0.463171	0.33024	0.336264	0.690396	0.564338	0.500086	0.493942	0.357769	0.453996	0.357769	0.59129	0.394018	0.511801	0.385662	0.365251	0.232746	0.264335	0.365251
Rs245	0.650256	0.487549	0.480807	0.411389	0.675046	0.346276	0.512765	0.537694	0.615942	0.832569	0.601392	0.449742	0.474826	0.549883	0.413858	0.484768	0.458145	0.42429	0.69092	0.484594	0.5045	0.626381	0.421916	0.500724	0.379233	0.315043	0.69092	0.404551	0.541752	0.491338	0.531699	0.755608	0.568466	0.41464	0.818146	0.615145	0.531699	0.413858	0.658651	0.329325	0.370969	0.328092	0.330443	0.634126	0.386904	0.461937	0.432225	0.461937	0.452228
Rs246	0.379891	0.338545	0.329484	0.374476	0.398559	0.231882	0.287775	0.412088	0.38012	0.429331	0.375561	0.408494	0.284046	0.371891	0.429331	0.248425	0.361328	0.383859	0.470004	0.474987	0.355496	0.36179	0.415775	0.353916	0.390429	0.51297	0.528844	0.151199	0.312468	0.355423	0.377723	0.223479	0.383917	0.28198	0.425958	0.483841	0.377723	0.271107	0.409563	0.31257	0.437734	0.33466	0.363761	0.417828	0.193386	0.25797	0.280902	0.25797	0.198251
Rs247	0.35831	0.199181	0.306552	0.404188	0.401603	0.385208	0.342179	0.50064	0.4561	0.325511	0.294047	0.478321	0.181453	0.428271	0.350829	0.213042	0.569197	0.262179	0.528703	0.180911	0.285125	0.183862	0.300304	0.30952	0.293389	0.35031	0.471544	0.44754	0.269859	0.38107	0.365918	0.430872	0.56316	0.549306	0.401603	0.647084	0.330699	0.350829	0.411876	0.368257	0.261594	0.547349	0.475711	0.317487	0.434407	0.367725	0.310614	0.340326	0.203865
Rs248	0.370671	0.236235	0.222978	0.300163	0.292053	0.44893	0.330443	0.450683	0.553421	0.362565	0.331101	0.567525	0.124623	0.465325	0.525084	0.218061	0.378103	0.218438	0.354448	0.354541	0.370969	0.307928	0.210607	0.277581	0.457195	0.610507	0.307928	0.354541	0.330443	0.271934	0.47454	0.467926	0.396615	0.492476	0.387364	0.797467	0.186858	0.244782	0.370969	0.305228	0.298648	0.515304	0.512765	0.330443	0.386904	0.461937	0.432225	0.250628	0.240919
Rs249	0.548873	0.370326	0.309279	0.345221	0.511886	0.313169	0.345531	0.414274	0.544075	0.404849	0.376159	0.412997	0.288549	0.456316	0.404849	0.284338	0.368757	0.359374	0.419546	0.208956	0.289639	0.321908	0.328349	0.386355	0.297903	0.540873	0.47219	0.370224	0.421517	0.502833	0.287513	0.353556	0.591205	0.342052	0.540873	0.510826	0.335141	0.304766	0.413253	0.370326	0.361959	0.505958	0.395542	0.321434	0.351226	0.368371	0.338659	0.39577	0.38606
Rs250	0.420682	0.130874	0.269498	0.441242	0.610507	0.322179	0.330443	0.320629	0.657906	0.496097	0.442327	0.5069	0.245251	0.675046	0.467926	0.227585	0.458145	0.241968	0.565757	0.354541	0.396286	0.263476	0.421916	0.234096	0.330443	0.438657	0.565757	0.404551	0.484594	0.359732	0.32039	0.313775	0.423284	0.433636	0.708947	0.649047	0.47454	0.290244	0.563341	0.329325	0.298648	0.303995	0.457195	0.430527	0.236622	0.299418	0.220916	0.37738	0.240919
Rs251	0.565323	0.359561	0.297206	0.363582	0.588807	0.479483	0.430872	0.42394	0.597072	0.50064	0.445486	0.521703	0.275824	0.655498	0.470787	0.207639	0.459872	0.320908	0.45567	0.325511	0.268174	0.401603	0.466708	0.393473	0.430872	0.496434	0.637992	0.48803	0.430872	0.324423	0.365598	0.56316	0.452928	0.497646	0.735222	0.526781	0.419665	0.50064	0.540107	0.333586	0.430872	0.375315	0.376804	0.496434	0.386187	0.376285	0.404188	0.530436	0.320715
Rs252	0.299811	0.258465	0.349487	0.456999	0.503119	0.375499	0.383764	0.376521	0.50484	0.421163	0.395564	0.529044	0.33387	0.628283	0.478321	0.264335	0.591885	0.33024	0.490006	0.307778	0.324206	0.331782	0.405006	0.373919	0.357788	0.391894	0.490006	0.383764	0.357788	0.324423	0.281909	0.315802	0.43209	0.549306	0.628283	0.503844	0.454129	0.367095	0.402167	0.258465	0.402167	0.314304	0.410432	0.437831	0.287497	0.203865	0.274237	0.475799	0.194156
Rs253	0.474741	0.586011	0.460019	0.350034	0.611658	0.355418	0.262328	0.42297	0.440527	0.719543	0.598526	0.478853	0.349423	0.551033	0.496399	0.403732	0.431979	0.512853	0.51027	0.551033	0.534082	0.567428	0.554098	0.589151	0.485471	0.611658	0.692591	0.284801	0.54263	0.369239	0.370969	0.314078	0.379336	0.324736	0.551033	0.623516	0.422262	0.534082	0.626456	0.388185	0.594707	0.496097	0.355418	0.635003	0.332573	0.375315	0.371776	0.520497	0.479624
Rs254	0.289909	0.297354	0.236931	0.270167	0.585591	0.447836	0.182807	0.339951	0.435689	0.305901	0.274437	0.2367	0.18636	0.381993	0.357194	0.15676	0.319211	0.183077	0.451934	0.322569	0.218994	0.206812	0.280694	0.266379	0.373862	0.306007	0.634256	0.545713	0.273779	0.221892	0.361582	0.439432	0.313975	0.403732	0.43606	0.433318	0.361582	0.439432	0.419665	0.248563	0.153036	0.371855	0.427929	0.322569	0.303571	0.294047	0.23836	0.435126	0.366576
Rs255	0.455141	0.361152	0.433636	0.45383	0.725855	0.545157	0.336357	0.302446	0.698854	0.319689	0.339586	0.48803	0.252356	0.656862	0.422343	0.320715	0.411876	0.40542	0.490415	0.288729	0.378103	0.289744	0.528895	0.455141	0.439011	0.656862	0.547573	0.386367	0.494581	0.559616	0.254999	0.319689	0.432499	0.513902	0.690763	0.501651	0.573453	0.477913	0.352785	0.311141	0.404078	0.439275	0.523568	0.46641	0.290759	0.281234	0.302816	0.443753	0.349487
Rs256	0.369582	0.328236	0.346574	0.364167	0.472807	0.293893	0.435689	0.31954	0.546524	0.39085	0.395104	0.487354	0.302281	0.415649	0.39085	0.332982	0.200293	0.315948	0.326163	0.277465	0.345187	0.431523	0.34484	0.318288	0.353451	0.472807	0.431523	0.327476	0.253368	0.38107	0.325079	0.310808	0.460619	0.353465	0.533432	0.607063	0.289008	0.336783	0.319211	0.228152	0.269201	0.258674	0.38012	0.353451	0.309829	0.300304	0.270593	0.300304	0.212634
Rs257	0.48254	0.174566	0.351398	0.336047	0.502711	0.458145	0.46641	0.432499	0.744746	0.395675	0.366985	0.613193	0.226381	0.656862	0.422343	0.311006	0.557058	0.323182	0.547573	0.243266	0.458145	0.336264	0.292506	0.32839	0.386367	0.531699	0.385054	0.553421	0.412343	0.393634	0.401603	0.422343	0.683813	0.504378	0.47454	0.740062	0.35031	0.319689	0.458145	0.387127	0.280464	0.411876	0.494581	0.336357	0.513902	0.536127	0.329484	0.359196	0.271525
Rs258	0.39625	0.25225	0.292506	0.394938	0.533432	0.371855	0.327476	0.460619	0.386239	0.336783	0.365251	0.467335	0.245122	0.472807	0.310808	0.195781	0.435132	0.22134	0.431523	0.302158	0.269201	0.277372	0.315853	0.269498	0.184375	0.38825	0.431523	0.353451	0.353451	0.416197	0.394369	0.310808	0.430766	0.423058	0.56518	0.301681	0.340302	0.310808	0.517037	0.354904	0.371855	0.406145	0.464677	0.353451	0.28316	0.222343	0.217949	0.247661	0.237952
Rs259	0.547261	0.396286	0.368757	0.424143	0.510826	0.293204	0.372369	0.337267	0.405429	0.542337	0.399254	0.586011	0.295967	0.538997	0.57219	0.259397	0.276253	0.394925	0.37307	0.372369	0.413832	0.42186	0.435132	0.439048	0.372369	0.456758	0.527221	0.287682	0.530593	0.426556	0.339724	0.388514	0.370969	0.450495	0.628609	0.640467	0.388514	0.284508	0.502422	0.298648	0.466476	0.276253	0.372369	0.422379	0.216132	0.299513	0.33466	0.392266	0.265514
Rs260	0.437648	0.249698	0.334597	0.317822	0.456316	0.649641	0.321434	0.387606	0.574847	0.353556	0.322092	0.497554	0.235905	0.540873	0.328863	0.218061	0.47697	0.281412	0.586601	0.252441	0.337267	0.276446	0.328349	0.386355	0.395542	0.570726	0.52776	0.691808	0.448186	0.303682	0.287513	0.404849	0.387606	0.612342	0.570726	0.606136	0.437795	0.458916	0.313169	0.345009	0.361959	0.47697	0.475585	0.345531	0.492305	0.42394	0.311991	0.513553	0.331993
Rs261	0.295591	0.378066	0.236931	0.441105	0.528206	0.378431	0.302446	0.290759	0.56316	0.387241	0.382452	0.522562	0.230131	0.665965	0.501651	0.143416	0.461937	0.277973	0.404078	0.327138	0.293596	0.352785	0.360226	0.369699	0.441195	0.441195	0.515304	0.46067	0.4051	0.241592	0.177202	0.387241	0.290759	0.415174	0.498353	0.751238	0.368257	0.41464	0.480807	0.275412	0.209355	0.522562	0.432499	0.378431	0.312917	0.266531	0.382452	0.506415	0.28198
Rs262	0.419127	0.40445	0.396119	0.413712	0.552206	0.448799	0.429665	0.451324	0.494989	0.335035	0.44465	0.34112	0.296715	0.582977	0.468567	0.248461	0.324206	0.287497	0.45367	0.457064	0.343439	0.351015	0.394386	0.343141	0.302913	0.311044	0.45367	0.429665	0.23392	0.467524	0.532972	0.468567	0.540936	0.526418	0.552206	0.405294	0.365918	0.412997	0.448799	0.301795	0.318746	0.402167	0.457064	0.377021	0.332706	0.271888	0.320138	0.377249	0.213389
Rs263	0.539699	0.335834	0.378066	0.308648	0.447141	0.328092	0.312259	0.4051	0.351703	0.5069	0.312917	0.25319	0.252356	0.420473	0.344381	0.198451	0.359232	0.323182	0.385054	0.336357	0.430746	0.436347	0.266531	0.402498	0.243266	0.27387	0.490415	0.494581	0.336357	0.259885	0.512829	0.5069	0.432499	0.536127	0.502711	0.596961	0.301519	0.319689	0.486316	0.335834	0.378103	0.333915	0.439011	0.312259	0.316076	0.256542	0.302816	0.306552	0.296843
Rs264	0.466002	0.273866	0.213389	0.383726	0.486725	0.530398	0.367095	0.358661	0.620152	0.376521	0.346165	0.451177	0.238323	0.516578	0.40392	0.197113	0.392613	0.137735	0.365918	0.291109	0.282562	0.315908	0.280069	0.214687	0.34112	0.349523	0.532972	0.570694	0.421163	0.19926	0.496575	0.655234	0.443219	0.455796	0.620152	0.618854	0.382165	0.490931	0.469774	0.323877	0.220492	0.338545	0.421163	0.429566	0.348307	0.395564	0.2534	0.425417	0.311006
Rs265	0.449333	0.331993	0.358016	0.392272	0.530398	0.577391	0.43209	0.349487	0.637386	0.358661	0.394479	0.73971	0.215592	0.562147	0.503844	0.305326	0.432225	0.336472	0.579098	0.298559	0.323877	0.299513	0.313896	0.393764	0.490931	0.628838	0.457737	0.385216	0.490931	0.535518	0.26256	0.423241	0.395711	0.477836	0.570694	0.673729	0.542144	0.341003	0.423241	0.331993	0.349852	0.462078	0.620143	0.332573	0.338405	0.385462	0.403508	0.467526	0.290595
Rs266	0.509574	0.338175	0.278348	0.391251	0.421531	0.45778	0.466045	0.37949	0.370224	0.396733	0.451177	0.467926	0.280401	0.347423	0.371415	0.212834	0.361959	0.147674	0.339767	0.248321	0.284508	0.25082	0.219457	0.264452	0.145137	0.347423	0.545619	0.580455	0.439376	0.252927	0.570726	0.396733	0.546544	0.45182	0.588585	0.469844	0.306034	0.396733	0.634711	0.586011	0.379818	0.524478	0.466045	0.248321	0.34311	0.359561	0.183246	0.38623	0.43209
Rs267	0.485235	0.572684	0.504556	0.498269	0.448799	0.549632	0.558179	0.471461	0.478321	0.572684	0.635219	0.655234	0.435257	0.505958	0.639376	0.415775	0.594937	0.348307	0.493365	0.535811	0.377781	0.493365	0.344119	0.457064	0.335035	0.394732	0.385152	0.412997	0.558179	0.336472	0.645789	0.451324	0.692976	0.475799	0.318746	0.513902	0.402167	0.540936	0.728078	0.532086	0.51886	0.628838	0.656619	0.468567	0.395711	0.50717	0.444484	0.549861	0.404696
Rs268	0.420141	0.299418	0.213574	0.444966	0.439275	0.450495	0.325511	0.324736	0.603484	0.259478	0.247661	0.48103	0.170463	0.496434	0.394925	0.110001	0.322671	0.208352	0.35031	0.25319	0.177202	0.210548	0.345348	0.293389	0.350829	0.526287	0.512829	0.430872	0.376804	0.254892	0.314304	0.441799	0.39577	0.435126	0.526287	0.628563	0.419665	0.38623	0.394925	0.324736	0.221654	0.459872	0.496434	0.300819	0.277973	0.330617	0.300304	0.358016	0.242754
Rs269	0.500904	0.273096	0.203253	0.360273	0.530736	0.401717	0.285792	0.228258	0.48022	0.571203	0.349763	0.536865	0.158632	0.489914	0.342089	0.236435	0.439398	0.243257	0.423943	0.353855	0.307593	0.352484	0.349763	0.352484	0.330258	0.489914	0.423943	0.376586	0.641537	0.285125	0.235782	0.550565	0.153391	0.289909	0.653031	0.571203	0.534275	0.467183	0.455418	0.317694	0.296356	0.555466	0.330258	0.467183	0.236042	0.339122	0.419165	0.446198	0.392042
Rs270	0.404214	0.414161	0.327138	0.391251	0.396213	0.240057	0.388083	0.37949	0.475585	0.476775	0.394018	0.576699	0.280401	0.474175	0.504946	0.227585	0.337267	0.405294	0.294305	0.36339	0.262035	0.339767	0.401778	0.509574	0.339293	0.619357	0.437406	0.226815	0.36339	0.338179	0.338573	0.346722	0.432133	0.284587	0.474175	0.623995	0.306034	0.322625	0.355126	0.223106	0.379818	0.476329	0.339293	0.439376	0.2931	0.38623	0.412088	0.283575	0.226238
Rs271	0.426244	0.362905	0.184003	0.541726	0.517717	0.438197	0.266402	0.521815	0.650351	0.427444	0.423943	0.499589	0.309691	0.492935	0.517717	0.291634	0.301335	0.123343	0.343972	0.373659	0.201808	0.286813	0.293025	0.181453	0.323561	0.384185	0.469135	0.448724	0.620519	0.346574	0.495491	0.620519	0.372428	0.314894	0.714427	0.576045	0.426498	0.394654	0.620519	0.405407	0.255876	0.548319	0.448724	0.517717	0.26856	0.369909	0.280366	0.381958	0.378806
Rs272	0.569552	0.469365	0.351398	0.45383	0.656862	0.607677	0.36105	0.378431	0.663763	0.536753	0.516516	0.386329	0.334594	0.531699	0.344381	0.274437	0.496434	0.281412	0.672736	0.386367	0.303995	0.436347	0.496105	0.32839	0.46641	0.420473	0.815837	0.439011	0.553421	0.393416	0.301519	0.599274	0.378431	0.473606	0.799963	0.564171	0.573453	0.632063	0.486316	0.335834	0.303995	0.411876	0.386367	0.553421	0.316076	0.359196	0.385054	0.637909	0.463897
Rs273	0.850114	0.537381	0.628838	0.590112	0.476924	0.710693	0.684451	0.498353	0.701694	0.47854	0.478806	0.684451	0.42754	0.594707	0.568152	0.474826	0.470004	0.530398	0.611658	0.440829	0.6417	0.439808	0.675456	0.635003	0.496399	0.534082	0.819297	0.55524	0.61776	0.667718	0.6417	0.537381	0.757271	0.877645	0.701694	0.777258	0.577161	0.537381	0.516537	0.507528	0.61776	0.441833	0.75591	0.505095	0.489725	0.510396	0.322635	0.382303	0.328236
Rs274	0.579786	0.51027	0.394498	0.46228	0.342945	0.743444	0.357804	0.651106	0.735313	0.388764	0.43606	0.475023	0.200293	0.79493	0.491418	0.322671	0.628609	0.448799	0.505423	0.508086	0.37307	0.454129	0.310288	0.471573	0.592644	0.661398	0.358819	0.535485	0.535485	0.370448	0.527221	0.701139	0.683895	0.674368	0.389465	0.976191	0.473153	0.491418	0.555391	0.628053	0.473153	1.0033	0.900128	0.405432	0.582977	0.542681	0.51297	0.45567	0.340601
Rs275	0.559616	0.340589	0.215912	0.33308	0.243314	0.290098	0.255803	0.455507	0.326684	0.526817	0.364017	0.510687	0.256186	0.243314	0.583976	0.257111	0.341409	0.351703	0.219183	0.342815	0.226919	0.259189	0.245968	0.454255	0.276857	0.524217	0.389809	0.543485	0.571656	0.231226	0.455442	0.326146	0.455507	0.312259	0.328472	0.609498	0.227184	0.281695	0.507822	0.490871	0.507822	0.806772	0.489418	0.255803	0.367834	0.491841	0.328598	0.240527	0.399894
Rs276	0.440527	0.245968	0.305126	0.191199	0.354018	0.241162	0.273001	0.60597	0.287523	0.470004	0.382402	0.423284	0.267185	0.459378	0.758246	0.237134	0.459378	0.423241	0.370969	0.37064	0.441833	0.275658	0.167101	0.496097	0.296532	0.305228	0.370969	0.537694	0.37064	0.380475	0.623516	0.336472	0.501314	0.424143	0.329325	0.544601	0.231207	0.104319	0.624154	0.369582	0.591364	0.480807	0.537694	0.250012	0.357769	0.321	0.305089	0.269707	0.259397
Rs277	0.454255	0.388217	0.304859	0.33308	0.328472	0.206717	0.298363	0.509574	0.373204	0.47275	0.364017	0.456619	0.256186	0.524217	0.6446	0.123579	0.389037	0.457064	0.300861	0.342815	0.35754	0.344346	0.245968	0.559616	0.320342	0.524217	0.389809	0.661268	0.463443	0.231226	0.357804	0.198313	0.455507	0.412343	0.373934	0.609498	0.187178	0.198313	0.622232	0.490871	0.563392	0.806772	0.389335	0.214981	0.419127	0.333617	0.379891	0.333617	0.348601
Rs278	0.509574	0.525387	0.352456	0.545402	0.474175	0.485179	0.521615	0.329479	0.404551	0.276105	0.288658	0.608448	0.307069	0.421531	0.533934	0.303571	0.413253	0.405294	0.294305	0.439376	0.379818	0.437406	0.268247	0.509574	0.388083	0.683895	0.294305	0.439376	0.493444	0.465093	0.353662	0.371415	0.459532	0.41464	0.501574	0.441673	0.511886	0.371415	0.405136	0.65055	0.57219	0.872785	0.611227	0.315762	0.317792	0.259478	0.383917	0.308268	0.376521
Rs279	0.421994	0.457195	0.534551	0.504022	0.439048	0.474741	0.567845	0.370224	0.363965	0.422097	0.337785	0.594558	0.386239	0.439048	0.611227	0.32985	0.735313	0.478321	0.563656	0.538858	0.718363	0.357804	0.386239	0.709676	0.356536	0.491691	0.622497	0.762001	0.380634	0.35911	0.651954	0.278996	0.562596	0.613193	0.31842	0.639386	0.508086	0.466045	0.589151	0.634126	0.474741	0.701694	0.62847	0.265564	0.494989	0.400531	0.316949	0.383764	0.400531
Rs280	0.505549	0.388217	0.428473	0.441293	0.373934	0.405168	0.543485	0.566732	0.527355	0.47275	0.44406	0.762001	0.35884	0.524217	0.85224	0.383862	0.439048	0.485235	0.259189	0.438125	0.481153	0.389809	0.318288	0.559616	0.389335	0.579786	0.344346	0.661268	0.543485	0.380758	0.751708	0.281695	0.566732	0.494581	0.524217	0.548873	0.312342	0.281695	0.622232	0.490871	0.622232	0.576249	0.489418	0.276857	0.419127	0.436271	0.353916	0.263	0.348601
Rs281	0.739051	0.34985	0.405273	0.648841	0.324736	0.568917	0.611993	0.540337	0.50064	0.536127	0.477756	0.763104	0.423649	0.43295	0.504378	0.342424	0.618299	0.425876	0.540107	0.545301	0.42394	0.422324	0.500421	0.479483	0.39577	0.554311	0.673639	0.578091	0.578091	0.38107	0.56749	0.40542	0.619039	0.713558	0.629852	0.554236	0.502951	0.434407	0.602818	0.55957	0.683452	0.618299	0.888246	0.404779	0.466708	0.393435	0.284198	0.226381	0.237134
Rs282	0.784955	0.648722	0.394018	0.569921	0.423284	0.498832	0.498832	0.521703	0.516691	0.58203	0.341338	0.523077	0.468138	0.537694	1.01094	0.48728	0.600214	0.561445	0.496399	0.666906	0.46067	0.61776	0.417113	0.577315	0.692988	0.600214	0.496399	0.591205	0.623995	0.402218	0.519835	0.61482	0.819094	0.720391	0.354172	0.719441	0.55524	0.46067	0.61482	0.797142	0.767096	0.749237	0.692988	0.478853	0.450092	0.47011	0.569921	0.614395	0.450092
Rs283	0.456619	0.290244	0.207728	0.36957	0.530593	0.405429	0.185717	0.378874	0.594558	0.355418	0.223479	0.641854	0.211285	0.530593	0.563787	0.313975	0.440829	0.40392	0.295673	0.293348	0.405429	0.341136	0.315503	0.456619	0.522189	0.753736	0.388764	0.551177	0.67634	0.35892	0.307498	0.371415	0.258246	0.259478	0.530593	0.69171	0.51335	0.346722	0.405429	0.396733	0.380111	0.55524	0.388658	0.388658	0.325511	0.393764	0.326256	0.331219	0.411261
Rs284	0.456619	0.525084	0.613193	0.551892	0.530593	0.54263	0.67634	0.353556	0.355418	0.405429	0.373761	0.641854	0.315503	0.651954	0.802198	0.338659	0.589433	0.586241	0.491418	0.611802	0.572483	0.438774	0.487354	0.62847	0.58103	0.475023	0.546988	0.439951	0.363965	0.437139	0.701402	0.405429	0.516075	0.739051	0.397062	0.558179	0.668349	0.504946	0.635003	0.585709	0.603254	0.440829	0.745333	0.316337	0.315802	0.305901	0.437482	0.603484	0.257111
Rs285	0.454255	0.464203	0.428473	0.359055	0.421562	0.290098	0.389335	0.627357	0.421994	0.526817	0.416661	0.62847	0.306196	0.767839	0.85224	0.331219	0.668622	0.639386	0.389809	0.463443	0.622232	0.540091	0.318288	0.677399	0.543485	0.524217	0.389809	0.543485	0.543485	0.318237	0.563656	0.281695	0.596585	0.553421	0.328472	0.578726	0.268857	0.218516	0.899864	0.575428	0.684752	0.636873	0.600644	0.298363	0.473194	0.383628	0.433959	0.436271	0.399894
Rs286	0.584513	0.306913	0.402997	0.602462	0.465023	0.193838	0.456619	0.448186	0.494019	0.611227	0.337785	0.594558	0.434356	0.439048	0.493444	0.346208	0.405429	0.459043	0.508086	0.310016	0.456619	0.455442	0.342925	0.421994	0.356536	0.389037	0.508086	0.456619	0.62847	0.378843	0.356675	0.439376	0.562596	0.430872	0.606102	0.782486	0.530593	0.248321	0.502139	0.457195	0.422097	0.422379	0.405326	0.439048	0.307778	0.373862	0.327476	0.383764	0.287775
Rs287	0.532217	0.364119	0.304859	0.33308	0.306493	0.35754	0.365804	0.760888	0.326684	0.583976	0.44406	0.567845	0.35884	0.373934	0.6446	0.281208	0.439048	0.351703	0.389809	0.389335	0.42986	0.437437	0.135967	0.454255	0.342815	0.421562	0.487447	0.725807	0.489418	0.288384	0.622497	0.421457	0.509574	0.615942	0.471573	0.641247	0.187178	0.198313	0.751444	0.490871	0.684752	0.668622	0.693017	0.298363	0.530353	0.35831	0.353916	0.285989	0.373919
Rs288	0.314493	0.490871	0.402498	0.385723	0.373934	0.226919	0.342815	0.627357	0.421994	0.583976	0.44406	0.762001	0.306196	0.524217	0.85224	0.331219	0.547261	0.639386	0.389809	0.543485	0.455178	0.389809	0.343606	0.741937	0.600644	0.701147	0.487447	0.438125	0.543485	0.380758	0.405432	0.239135	0.355423	0.288729	0.328472	0.89718	0.357804	0.260188	0.622232	0.438227	0.563392	0.806772	0.438125	0.438125	0.419127	0.46367	0.491117	0.285989	0.348601
Rs289	0.524217	0.380217	0.344487	0.405122	0.255933	0.499822	0.455442	0.529745	0.36494	0.341136	0.306007	0.867065	0.297931	0.489548	0.546988	0.248563	0.510826	0.4214	0.314367	0.312342	0.32655	0.405339	0.214978	0.471573	0.405432	0.489548	0.314367	0.455442	0.592644	0.318237	0.527221	0.491418	0.421531	0.430746	0.365934	0.666036	0.42186	0.295673	0.42186	0.380217	0.473153	0.430783	0.622497	0.268857	0.385152	0.45567	0.371891	0.35031	0.179332
Rs290	0.421562	0.332589	0.229418	0.377723	0.389465	0.499822	0.357804	0.323893	0.439048	0.17051	0.190937	0.372369	0.297931	0.298493	0.46475	0.202043	0.333144	0.248129	0.358819	0.508086	0.397167	0.271808	0.261498	0.306493	0.405432	0.600774	0.454129	0.508086	0.312342	0.318237	0.584379	0.388764	0.347423	0.303995	0.489548	0.429648	0.473153	0.341136	0.198716	0.404909	0.282098	0.456758	0.357804	0.268857	0.264524	0.35031	0.248277	0.254999	0.315908
Rs291	0.437437	0.325473	0.336264	0.340954	0.505423	0.388944	0.373678	0.387395	0.622497	0.454649	0.451934	0.546988	0.289008	0.616648	0.454649	0.265514	0.42186	0.335141	0.287682	0.421306	0.489028	0.421213	0.431523	0.389809	0.373678	0.616648	0.470004	0.373678	0.421306	0.298486	0.543615	0.404638	0.387395	0.27387	0.616648	0.649121	0.298493	0.454649	0.342424	0.19764	0.297972	0.32655	0.284731	0.523961	0.351015	0.471544	0.31178	0.270874	0.284154
Rs292	0.505549	0.388217	0.28187	0.385723	0.284987	0.35754	0.342815	0.691896	0.326684	0.47275	0.389993	0.456619	0.306196	0.328472	0.583976	0.23358	0.341409	0.279383	0.344346	0.438125	0.38107	0.389809	0.135967	0.358945	0.298363	0.421562	0.437437	0.661268	0.389335	0.259397	0.622497	0.372666	0.566732	0.615942	0.421562	0.609498	0.148712	0.198313	0.684752	0.546441	0.563392	0.701412	0.600644	0.235184	0.473194	0.333617	0.303905	0.218548	0.348601
Rs293	0.230818	0.234934	0.271525	0.335639	0.563744	0.375499	0.23716	0.40392	0.400531	0.315802	0.208352	0.458318	0.206771	0.418562	0.478321	0.217524	0.365598	0.267494	0.434436	0.357788	0.375499	0.238692	0.263927	0.348601	0.466002	0.474132	0.490006	0.494989	0.33247	0.393416	0.295905	0.315802	0.203249	0.474666	0.563744	0.414231	0.381993	0.291109	0.324206	0.234934	0.299513	0.409563	0.357788	0.383764	0.313473	0.227963	0.274237	0.303949	0.294239
Rs294	0.524217	0.51027	0.531699	0.433293	0.489548	0.473153	0.455442	0.529745	0.668622	0.518817	0.493218	0.589433	0.306196	0.79493	0.605828	0.375315	0.491691	0.535811	0.505423	0.622497	0.645004	0.616648	0.533432	0.524217	0.622497	0.489548	0.55949	0.227184	0.405432	0.447449	0.709542	0.575975	0.529745	0.575928	0.489548	0.848358	0.405432	0.364666	0.584379	0.222588	0.37307	0.223144	0.622497	0.508086	0.335141	0.428271	0.454129	0.325617	0.200839
Rs295	0.473288	0.306913	0.302913	0.34785	0.252462	0.301469	0.356536	0.321434	0.388658	0.388083	0.277465	0.659097	0.20443	0.439048	0.675765	0.219457	0.405429	0.459043	0.227184	0.310016	0.422097	0.357804	0.208558	0.527355	0.333006	0.668622	0.187178	0.547261	0.538858	0.243153	0.422379	0.193838	0.404551	0.376804	0.295947	0.682633	0.279279	0.16494	0.510687	0.571605	0.53031	0.701694	0.510687	0.105222	0.317487	0.383764	0.396992	0.297876	0.347887
Rs296	0.684752	0.580886	0.545157	0.416898	0.473153	0.76214	0.51909	0.51335	0.456619	0.530593	0.419665	0.458072	0.389194	0.473153	0.589433	0.5347	0.493875	0.460019	0.725416	0.606102	0.628609	0.600253	0.371855	0.563392	0.576249	0.42186	0.437734	0.576249	0.491691	0.615855	0.567428	0.753736	0.602962	0.889219	0.499822	0.524478	0.51027	0.502422	0.405465	0.551033	0.597837	0.611658	0.547261	0.465023	0.535811	0.496434	0.559095	0.621597	0.457737
Rs297	0.405432	0.549883	0.493365	0.470391	0.584379	0.456203	0.388764	0.403672	0.422379	0.421531	0.361582	0.772861	0.395155	0.778535	0.717797	0.382303	0.388514	0.557058	0.298493	0.388764	0.628053	0.661398	0.289008	0.622497	0.546988	0.473153	0.342945	0.709542	0.73504	0.314304	0.310155	0.309599	0.387364	0.557058	0.527221	0.656862	0.456758	0.371521	0.605828	0.492724	0.628053	0.439808	0.491418	0.388764	0.401603	0.26828	0.275069	0.553843	0.381993
Rs298	0.594558	0.537694	0.629852	0.302703	0.684451	0.432133	0.405465	0.510164	0.626307	0.559456	0.603642	0.405425	0.273349	0.684451	0.559456	0.373106	0.460994	0.59129	0.45778	0.414161	0.537694	0.51335	0.47011	0.594558	0.432133	0.388185	0.51335	0.258862	0.405465	0.623266	0.666592	0.559456	0.61482	0.40433	0.504946	0.778272	0.370326	0.396615	0.666906	0.273001	0.459532	0.387606	0.641854	0.496399	0.303874	0.373607	0.49087	0.346208	0.346208
Rs299	0.528895	0.329325	0.369582	0.354231	0.438657	0.422262	0.484594	0.738365	0.682633	0.617457	0.502951	0.665965	0.353465	0.492724	0.387883	0.530436	0.328092	0.396119	0.403238	0.26145	0.44893	0.508598	0.337358	0.395364	0.571605	0.579735	0.626381	0.571605	0.512765	0.465093	0.47454	0.684149	0.507841	0.492476	0.818146	0.9253	0.32039	0.440527	0.396286	0.329325	0.396286	0.430746	0.457195	0.634126	0.665617	0.621002	0.347668	0.324736	0.367671
Rs300	0.527355	0.700817	0.420141	0.591472	0.668622	0.619923	0.567845	0.306913	0.67634	0.611227	0.49453	0.72809	0.415739	0.439048	0.589151	0.69903	0.355418	0.421163	0.508086	0.62847	0.53031	0.622497	0.514775	0.527355	0.72691	0.967115	0.622497	0.456619	0.660218	0.437309	0.422379	0.550602	0.475585	0.430872	0.668622	0.708378	0.718645	0.744758	0.53031	0.772276	0.474741	0.773153	0.491691	0.62847	0.437831	0.620152	0.49453	0.689145	0.792573
Rs301	0.530593	0.640467	0.516578	0.53807	0.439808	0.533488	0.355126	0.515304	0.290547	0.439921	0.308684	0.599901	0.414314	0.293204	0.533488	0.343478	0.459378	0.520497	0.567984	0.45778	0.405136	0.456758	0.272614	0.651954	0.405136	0.439808	0.567984	0.57219	0.51335	0.400909	0.371564	0.387277	0.47697	0.585036	0.388514	0.717248	0.594707	0.387277	0.533488	0.515304	0.594112	0.61776	0.611658	0.293204	0.382165	0.27951	0.361328	0.419665	0.345187
Rs302	0.553421	0.318288	0.48313	0.401316	0.575928	0.590726	0.449742	0.51066	0.517883	0.432499	0.385054	0.422324	0.341356	0.352785	0.302446	0.300905	0.540107	0.358016	0.799963	0.319689	0.395675	0.27387	0.474826	0.439011	0.395675	0.404078	0.967017	0.575928	0.344381	0.494696	0.496434	0.498353	0.532423	0.712195	0.640467	0.48313	0.496434	0.498353	0.441195	0.318288	0.361152	0.394925	0.632063	0.395675	0.473606	0.405057	0.308648	0.395155	0.356883
Rs303	0.802198	0.441673	0.59595	0.606289	0.684451	0.824175	0.710847	0.58203	0.692988	0.657896	0.614395	0.720506	0.505206	0.440829	0.387606	0.518368	0.649047	0.453069	1.02418	0.496399	0.546544	0.45778	0.66676	0.533934	0.546544	0.61776	1.23548	0.684451	0.609064	0.716649	0.537381	0.600214	0.58203	0.887546	1.00722	0.56316	0.738051	0.710847	0.600214	0.498832	0.600214	0.591205	0.907557	0.609064	0.610241	0.5017	0.398496	0.49139	0.480864
Rs304	0.508633	0.355748	0.346165	0.361959	0.410474	0.451769	0.346208	0.365398	0.508633	0.473531	0.384185	0.400636	0.195498	0.410474	0.31069	0.284046	0.371648	0.249313	0.399254	0.243554	0.31069	0.345187	0.384185	0.363451	0.268247	0.382303	0.456412	0.373607	0.382303	0.308925	0.478806	0.50528	0.455011	0.523691	0.573172	0.500316	0.306956	0.44276	0.48254	0.355748	0.31954	0.430489	0.346208	0.328236	0.326163	0.374693	0.353414	0.405465	0.385003
Rs305	0.446774	0.284801	0.369699	0.25027	0.318146	0.348271	0.380634	0.594558	0.2703	0.388658	0.383862	0.594558	0.272285	0.438774	0.551177	0.175488	0.45778	0.423153	0.35701	0.244058	0.397062	0.268063	0.145728	0.526817	0.265564	0.413456	0.454649	0.62847	0.430644	0.349168	0.529745	0.248896	0.422708	0.46067	0.46475	0.576699	0.27843	0.165514	0.589433	0.405429	0.651954	0.51335	0.597698	0.182183	0.412997	0.276721	0.247009	0.276721	0.243481
Rs306	0.319044	0.326488	0.218438	0.299302	0.198566	0.248129	0.279383	0.540936	0.269859	0.386329	0.33024	0.603484	0.191354	0.335141	0.558179	0.248461	0.457737	0.340141	0.21444	0.302913	0.318746	0.303387	0.207174	0.419127	0.377021	0.493365	0.351015	0.377021	0.351703	0.241162	0.418562	0.310343	0.395754	0.306552	0.220072	0.769937	0.179332	0.286245	0.448799	0.431849	0.448799	0.680881	0.457064	0.327011	0.414944	0.40542	0.320138	0.223098	0.213389
Rs307	0.505549	0.412909	0.32839	0.413122	0.284987	0.33455	0.438125	0.691896	0.527355	0.526817	0.472231	0.693008	0.35884	0.579786	0.778132	0.281208	0.491691	0.514222	0.344346	0.463443	0.455178	0.389809	0.318288	0.616774	0.489418	0.701147	0.540091	0.725807	0.543485	0.259397	0.508086	0.239135	0.596585	0.553421	0.524217	0.641247	0.227184	0.260188	0.684752	0.51827	0.751444	0.844513	0.543485	0.342815	0.590977	0.436271	0.328598	0.285989	0.348601
Rs308	0.364017	0.322671	0.366985	0.325737	0.618381	0.419665	0.373862	0.451177	0.525302	0.281208	0.328504	0.321117	0.239003	0.585591	0.529044	0.192206	0.650568	0.404696	0.509093	0.427929	0.314304	0.206812	0.395104	0.44406	0.400531	0.381993	0.569717	0.485088	0.273779	0.417438	0.59797	0.383862	0.511801	0.385054	0.408661	0.296116	0.472807	0.411261	0.537448	0.322671	0.289612	0.517037	0.545713	0.322569	0.33024	0.320715	0.346574	0.376285	0.311006
Rs309	0.567845	0.290244	0.360353	0.574804	0.589433	0.54263	0.494019	0.440527	0.659097	0.396733	0.458318	0.496399	0.358272	0.475023	0.594558	0.269707	0.496399	0.323877	0.668349	0.494019	0.363965	0.252188	0.519102	0.310016	0.46662	0.530593	0.806499	0.651954	0.46662	0.502021	0.51335	0.355418	0.516075	0.61417	0.651954	0.497554	0.57219	0.458072	0.572483	0.496097	0.405429	0.586011	0.781701	0.363965	0.350829	0.367095	0.326256	0.411261	0.347093
Rs310	0.684461	0.379336	0.489007	0.566257	0.580886	0.728239	0.603254	0.459378	0.684149	0.496399	0.542144	0.6417	0.37841	0.493875	0.496399	0.423216	0.577161	0.39507	0.835692	0.458072	0.513642	0.356119	0.648705	0.422097	0.572483	0.551033	1.00275	0.551033	0.513642	0.613387	0.476329	0.476924	0.599901	0.828618	0.745189	0.61417	0.594112	0.594707	0.534082	0.459378	0.476924	0.487549	0.773153	0.485471	0.479483	0.469774	0.344377	0.489725	0.365214
Rs311	0.508633	0.337358	0.273636	0.437734	0.410474	0.430766	0.293564	0.365398	0.540382	0.473531	0.353414	0.334468	0.211402	0.439461	0.275705	0.228477	0.352327	0.171351	0.399254	0.31954	0.259397	0.345187	0.353414	0.260797	0.243554	0.328236	0.456412	0.430766	0.430766	0.197497	0.478806	0.571971	0.424239	0.447098	0.607073	0.477235	0.361023	0.473531	0.48254	0.355748	0.243554	0.430489	0.293564	0.382303	0.308093	0.374693	0.283584	0.405465	0.34484
Rs312	0.428473	0.335834	0.275412	0.45383	0.394498	0.515304	0.288729	0.432499	0.44754	0.369699	0.366985	0.430872	0.201063	0.420473	0.319689	0.233045	0.411876	0.176578	0.385054	0.265739	0.257475	0.289744	0.292506	0.259397	0.265739	0.36918	0.436347	0.36105	0.412343	0.271934	0.45567	0.477913	0.432499	0.545651	0.624072	0.442811	0.35031	0.422343	0.486316	0.387127	0.352785	0.467446	0.386367	0.336357	0.290759	0.281234	0.251523	0.414766	0.322819
Rs313	0.47275	0.405429	0.344381	0.25027	0.210516	0.324741	0.310016	0.563787	0.315762	0.494019	0.411261	0.405429	0.222274	0.388764	0.745333	0.270799	0.405136	0.431849	0.268063	0.483288	0.397062	0.35701	0.145728	0.499418	0.356536	0.388764	0.268063	0.405326	0.430644	0.297401	0.717797	0.388658	0.504946	0.432499	0.273695	0.675139	0.193273	0.145712	0.589433	0.458072	0.589433	0.634711	0.567845	0.223005	0.310343	0.376804	0.40116	0.230201	0.315802
Rs314	0.40656	0.420784	0.356883	0.260066	0.320598	0.437734	0.287775	0.470928	0.353451	0.321117	0.318403	0.477862	0.255876	0.398559	0.518943	0.259414	0.416898	0.424239	0.31178	0.390429	0.304203	0.31178	0.167939	0.52097	0.312468	0.398559	0.31178	0.445999	0.445999	0.368411	0.492133	0.321117	0.356518	0.308648	0.345916	0.453069	0.377723	0.247009	0.409563	0.287252	0.437734	0.475739	0.50484	0.217157	0.29347	0.283946	0.280902	0.232653	0.248261
Rs315	0.534649	0.373106	0.363723	0.360934	0.371648	0.474826	0.362639	0.383726	0.534649	0.474826	0.383665	0.420851	0.195498	0.430489	0.325294	0.280055	0.371648	0.261821	0.418182	0.254426	0.325294	0.361023	0.34068	0.380498	0.280401	0.400636	0.418182	0.391627	0.400636	0.308925	0.503573	0.507615	0.479036	0.553405	0.534649	0.528026	0.306956	0.402959	0.507615	0.373106	0.334468	0.4526	0.362639	0.28941	0.342887	0.394654	0.372428	0.405407	0.384185
Rs316	0.393152	0.377781	0.36872	0.383859	0.582977	0.535811	0.457064	0.480311	0.620152	0.239725	0.303571	0.393764	0.269316	0.614726	0.412997	0.198451	0.516578	0.36754	0.509239	0.377021	0.318746	0.303387	0.394386	0.419127	0.514222	0.493365	0.6306	0.485235	0.23392	0.38107	0.474132	0.558179	0.510164	0.504378	0.552206	0.462452	0.474132	0.497554	0.343439	0.254167	0.271118	0.457737	0.544075	0.429665	0.443931	0.34985	0.375708	0.40542	0.237487
Rs317	0.464316	0.370326	0.309279	0.432233	0.429648	0.554331	0.321434	0.414274	0.485235	0.404849	0.40433	0.440396	0.210587	0.429648	0.304766	0.268072	0.394732	0.186102	0.419546	0.252441	0.289639	0.321908	0.328349	0.291044	0.274914	0.403672	0.47219	0.345531	0.395542	0.315448	0.437795	0.516075	0.469844	0.587787	0.666036	0.480973	0.335141	0.458916	0.46732	0.370326	0.361959	0.448799	0.370224	0.370224	0.325251	0.315727	0.286015	0.452928	0.358661
Rs318	0.46367	0.394925	0.332528	0.404188	0.483841	0.526287	0.317487	0.38623	0.545713	0.430872	0.405273	0.383862	0.206771	0.483841	0.300819	0.274437	0.392266	0.227585	0.417477	0.269859	0.285125	0.366184	0.384862	0.333617	0.293389	0.401603	0.471544	0.393473	0.367497	0.291634	0.43606	0.517883	0.470787	0.559207	0.605202	0.452928	0.330699	0.517883	0.496434	0.342282	0.309222	0.447836	0.367497	0.367497	0.34985	0.340326	0.338013	0.485508	0.386187
Rs319	0.402997	0.260152	0.323182	0.402959	0.4214	0.58138	0.440396	0.405294	0.603484	0.208705	0.320138	0.43209	0.185895	0.535811	0.451324	0.164252	0.598331	0.268264	0.552206	0.386329	0.351806	0.198566	0.344119	0.302913	0.412997	0.47697	0.493365	0.440396	0.217252	0.405465	0.516578	0.431849	0.554825	0.550046	0.368757	0.569095	0.385152	0.395754	0.351806	0.308942	0.208705	0.530398	0.656619	0.262715	0.395711	0.385809	0.354872	0.313473	0.179957
Rs320	0.488171	0.403238	0.338013	0.415254	0.449771	0.49285	0.32985	0.356883	0.550692	0.453069	0.374476	0.40238	0.206251	0.449771	0.311991	0.284046	0.354231	0.233398	0.382165	0.287252	0.295024	0.382165	0.383505	0.347093	0.303874	0.420784	0.437734	0.356518	0.383917	0.291634	0.458788	0.548379	0.434549	0.524316	0.617383	0.487545	0.344377	0.483841	0.470928	0.338659	0.303874	0.411389	0.32985	0.365214	0.308301	0.35515	0.352734	0.457833	0.385003
Rs321	0.485088	0.413339	0.348114	0.404596	0.447836	0.552246	0.331219	0.40433	0.573172	0.430885	0.405414	0.401778	0.206771	0.506676	0.313975	0.270593	0.392266	0.237952	0.43606	0.281208	0.297354	0.381993	0.343972	0.347887	0.305901	0.419665	0.43606	0.411261	0.383862	0.291634	0.456412	0.520497	0.493942	0.589327	0.569197	0.475422	0.330699	0.48103	0.520497	0.357769	0.322671	0.469314	0.383862	0.331219	0.366576	0.356675	0.354725	0.487937	0.385662
Rs322	0.419127	0.351806	0.36872	0.354872	0.552206	0.47697	0.485235	0.480311	0.620152	0.239725	0.33024	0.367095	0.242647	0.614726	0.440396	0.174353	0.516578	0.36754	0.509239	0.377021	0.343439	0.257925	0.394386	0.419127	0.457064	0.493365	0.6306	0.485235	0.211941	0.417438	0.532972	0.497554	0.572684	0.473606	0.493365	0.492305	0.418562	0.440396	0.394732	0.301795	0.271118	0.516578	0.574847	0.377021	0.443931	0.377249	0.375708	0.34985	0.237487
Rs323	0.420141	0.250628	0.313658	0.363582	0.439275	0.571856	0.459043	0.42394	0.627484	0.221654	0.338013	0.451177	0.201063	0.557058	0.470787	0.178248	0.621597	0.284338	0.573453	0.376804	0.368257	0.210548	0.334594	0.317487	0.430872	0.496434	0.512829	0.459043	0.230201	0.429784	0.537448	0.450495	0.545301	0.507547	0.385208	0.55957	0.401603	0.38623	0.368257	0.299418	0.221654	0.520497	0.682186	0.276721	0.415174	0.405273	0.374335	0.330617	0.193964
Rs324	0.343141	0.277698	0.290759	0.354872	0.465194	0.448799	0.402997	0.395754	0.494989	0.310343	0.385809	0.48803	0.242647	0.522353	0.360353	0.127833	0.486725	0.223098	0.509239	0.23392	0.225656	0.172767	0.309829	0.367834	0.256393	0.359834	0.56808	0.544075	0.351703	0.33332	0.365918	0.468567	0.395754	0.405057	0.493365	0.554825	0.418562	0.412997	0.4214	0.301795	0.225656	0.547349	0.544075	0.351703	0.386773	0.377249	0.320138	0.434407	0.262179
Rs325	0.462129	0.420784	0.474666	0.315636	0.677273	0.559095	0.390429	0.206236	0.45415	0.347093	0.375561	0.336783	0.175833	0.483117	0.321117	0.259414	0.388727	0.337228	0.470004	0.240147	0.382165	0.31178	0.385003	0.433959	0.312468	0.320598	0.528844	0.417828	0.363761	0.402498	0.377723	0.429331	0.412088	0.464357	0.51297	0.453069	0.492133	0.550692	0.466722	0.365214	0.27951	0.388727	0.445999	0.287775	0.267494	0.283946	0.308301	0.554236	0.415315
Rs326	0.550692	0.338659	0.328304	0.372269	0.392613	0.432225	0.32985	0.404696	0.518943	0.51559	0.394495	0.382402	0.206251	0.392613	0.295024	0.266629	0.354231	0.233398	0.437734	0.253864	0.295024	0.329521	0.394495	0.347093	0.253864	0.365214	0.496575	0.412088	0.392613	0.308925	0.458788	0.548379	0.46532	0.534217	0.583481	0.544527	0.291734	0.453069	0.462078	0.338659	0.303874	0.472014	0.32985	0.365214	0.36546	0.415775	0.363723	0.385003	0.36546
Rs327	0.44406	0.430885	0.339586	0.384578	0.408661	0.569197	0.347887	0.422189	0.58984	0.411261	0.446287	0.363451	0.212335	0.523071	0.281208	0.280694	0.427425	0.231867	0.397867	0.297876	0.289612	0.397867	0.395104	0.338699	0.322569	0.43606	0.451934	0.373862	0.347887	0.312077	0.472807	0.560793	0.451177	0.539205	0.585591	0.493942	0.310288	0.560793	0.419665	0.322671	0.289612	0.486265	0.400531	0.400531	0.385809	0.376285	0.375561	0.465897	0.366576
Rs328	0.408494	0.345221	0.307468	0.496201	0.399947	0.354231	0.283038	0.326701	0.437482	0.472014	0.2948	0.441262	0.244886	0.489559	0.527543	0.206251	0.458788	0.238323	0.416898	0.391251	0.354231	0.361328	0.331897	0.326256	0.309013	0.217626	0.416898	0.450092	0.480864	0.216767	0.478806	0.441242	0.354872	0.503036	0.380324	0.558782	0.416898	0.373392	0.605545	0.345221	0.25772	0.343478	0.36308	0.317709	0.207422	0.277155	0.302045	0.436997	0.260066
Rs329	0.514222	0.34311	0.25672	0.333129	0.271118	0.335035	0.360353	0.523077	0.421163	0.34311	0.28316	0.586241	0.220421	0.535811	0.639376	0.163844	0.440786	0.405465	0.335141	0.294649	0.351806	0.287513	0.22134	0.514222	0.386329	0.535811	0.437795	0.728078	0.497554	0.223144	0.349523	0.245471	0.563835	0.517257	0.368757	0.647433	0.251885	0.208705	0.61417	0.572684	0.58138	0.746585	0.497554	0.195273	0.485323	0.357639	0.272634	0.303571	0.267494
Rs330	0.388217	0.346871	0.413796	0.489559	0.404909	0.439808	0.347989	0.525387	0.484594	0.30779	0.248563	0.626307	0.316079	0.567428	0.635003	0.339586	0.476329	0.423153	0.371993	0.372086	0.551033	0.371993	0.228152	0.546441	0.324458	0.538441	0.238462	0.651671	0.474741	0.450951	0.438657	0.262328	0.55524	0.711331	0.430227	0.568152	0.338573	0.197789	0.466476	0.476924	0.580886	0.658651	0.651671	0.278996	0.431849	0.244643	0.287252	0.221654	0.282562
Rs331	0.386367	0.39625	0.414766	0.496626	0.352785	0.335834	0.369699	0.369582	0.310343	0.378431	0.241213	0.664943	0.295434	0.352785	0.692509	0.317994	0.422324	0.445027	0.420473	0.449742	0.498353	0.36918	0.230686	0.553421	0.344381	0.515304	0.32039	0.395675	0.422343	0.392835	0.385208	0.187376	0.442811	0.550046	0.303995	0.683801	0.439275	0.16587	0.528206	0.51066	0.590726	0.540107	0.640467	0.204619	0.246833	0.199205	0.319175	0.246833	0.236931
Rs332	0.496097	0.166195	0.350712	0.503573	0.6417	0.414434	0.37064	0.423649	0.684149	0.405425	0.382402	0.480807	0.264174	0.577161	0.519835	0.237134	0.573181	0.356883	0.727644	0.423284	0.396615	0.231207	0.51481	0.290244	0.450683	0.516537	0.658651	0.516537	0.450683	0.541241	0.441195	0.336472	0.442474	0.494669	0.617457	0.577391	0.623516	0.336472	0.559616	0.432823	0.320629	0.45182	0.666906	0.354018	0.279808	0.347668	0.332488	0.364757	0.284715
Rs333	0.438227	0.422857	0.335834	0.344377	0.287126	0.339724	0.422097	0.468228	0.306913	0.355418	0.348647	0.684149	0.28941	0.404909	0.667793	0.236931	0.370969	0.414303	0.281022	0.278996	0.439808	0.371993	0.137181	0.546441	0.324458	0.567428	0.371993	0.559298	0.474741	0.30643	0.474175	0.197789	0.440829	0.45182	0.404909	0.666592	0.292053	0.156967	0.643407	0.594707	0.710098	0.634711	0.619923	0.153833	0.351806	0.244643	0.287252	0.316964	0.332573
Rs334	0.464203	0.396881	0.335834	0.371776	0.201968	0.293204	0.396779	0.525387	0.36339	0.458072	0.348647	0.617457	0.263435	0.456203	0.635003	0.212834	0.422262	0.501314	0.281022	0.372086	0.413832	0.371993	0.228152	0.605281	0.422097	0.567428	0.420784	0.53031	0.502139	0.21039	0.438657	0.218843	0.468228	0.51066	0.456203	0.632691	0.247602	0.17717	0.580886	0.505095	0.710098	0.658651	0.448072	0.214457	0.40445	0.316964	0.287252	0.268174	0.282562
Rs335	0.430872	0.452928	0.330617	0.382446	0.244643	0.333586	0.413629	0.377249	0.376521	0.39577	0.279025	0.493942	0.253093	0.479483	0.647084	0.192631	0.402714	0.446287	0.285125	0.441799	0.43295	0.385208	0.226381	0.580403	0.441799	0.479483	0.439275	0.56316	0.441799	0.120231	0.459872	0.265716	0.434407	0.510826	0.422324	0.583948	0.297354	0.218088	0.554311	0.482781	0.554311	0.56749	0.413629	0.199181	0.358016	0.283946	0.268035	0.327703	0.289778
Rs336	0.428473	0.361152	0.378066	0.393205	0.502711	0.486316	0.288729	0.352456	0.504698	0.449742	0.395155	0.403473	0.17637	0.561552	0.319689	0.242754	0.467446	0.271888	0.436347	0.243266	0.328092	0.336264	0.403732	0.402498	0.265739	0.36918	0.436347	0.36105	0.386367	0.315448	0.401603	0.477913	0.432499	0.578441	0.561552	0.501651	0.35031	0.477913	0.515304	0.311141	0.328092	0.439275	0.386367	0.36105	0.316076	0.306552	0.356883	0.504378	0.349487
Rs337	0.389993	0.322671	0.366985	0.384578	0.523071	0.447836	0.250248	0.394018	0.464677	0.411261	0.356675	0.363451	0.18636	0.553843	0.357194	0.22805	0.548786	0.309829	0.451934	0.297876	0.265514	0.251263	0.395104	0.416661	0.273779	0.330699	0.451934	0.347887	0.400531	0.299418	0.415649	0.411261	0.451177	0.506415	0.523071	0.34876	0.415649	0.439432	0.537448	0.297354	0.365598	0.456412	0.400531	0.373862	0.277596	0.268072	0.291004	0.435126	0.311006
Rs338	0.548873	0.370326	0.334597	0.40238	0.353662	0.554331	0.297903	0.498832	0.457064	0.431517	0.376159	0.527407	0.315948	0.540873	0.487087	0.268072	0.598331	0.332706	0.586601	0.370224	0.439921	0.47219	0.328349	0.411672	0.395542	0.429648	0.369536	0.532743	0.625116	0.382139	0.335141	0.404849	0.414274	0.621688	0.456316	0.541597	0.385152	0.328863	0.46732	0.47854	0.554331	0.535811	0.448186	0.370224	0.377895	0.341702	0.394229	0.482781	0.331993
Rs339	0.473325	0.329325	0.15702	0.441242	0.338573	0.5045	0.283923	0.537694	0.494581	0.313775	0.385168	0.632063	0.219933	0.412681	0.337873	0.193964	0.378103	0.150997	0.263476	0.239471	0.188647	0.263476	0.187076	0.234096	0.283923	0.549883	0.454531	0.512765	0.602377	0.241162	0.36918	0.467926	0.423284	0.325422	0.549883	0.684138	0.32039	0.413858	0.5045	0.487549	0.370969	0.745827	0.571605	0.404551	0.414303	0.404779	0.197386	0.250628	0.315027
Rs340	0.505549	0.464203	0.539699	0.530905	0.767839	0.592379	0.7948	0.355423	0.709676	0.6446	0.593592	0.836109	0.47325	0.839298	0.709139	0.498273	0.806772	0.514222	0.595661	0.516086	0.622232	0.654501	0.60597	0.616774	0.600644	0.638627	0.595661	0.489418	0.489418	0.447449	0.508086	0.583976	0.537745	0.553421	0.839298	0.707938	0.751708	0.676349	0.563392	0.464203	0.563392	0.36494	0.389335	0.661268	0.419127	0.436271	0.551742	0.751352	0.399894
Rs341	0.778669	0.709667	0.673287	0.35884	0.439048	0.619923	0.567845	0.657906	0.373204	0.675765	0.49453	0.533934	0.415739	0.547261	0.550602	0.401778	0.572483	0.672477	0.685017	0.483288	0.474741	0.455442	0.425163	0.852777	0.567845	0.439048	0.823167	0.510687	0.693008	0.595869	0.589433	0.744758	0.562596	0.718554	0.584513	0.606596	0.589433	0.521615	0.53031	0.466045	0.762001	0.603254	0.62847	0.547261	0.555614	0.577461	0.514775	0.644153	0.4561
Rs342	0.312259	0.343606	0.266066	0.314304	0.486316	0.498353	0.272061	0.41464	0.350829	0.352456	0.346574	0.413629	0.165381	0.404078	0.327138	0.153942	0.422324	0.190044	0.420473	0.272061	0.196072	0.229418	0.245251	0.336357	0.319689	0.430746	0.47454	0.404078	0.295591	0.33393	0.285125	0.558978	0.343606	0.485508	0.458145	0.523248	0.285125	0.46067	0.369699	0.293596	0.287044	0.673639	0.5069	0.422343	0.414766	0.349487	0.393205	0.424143	0.339586
Rs343	0.388217	0.299243	0.335834	0.344377	0.265147	0.439808	0.396779	0.684451	0.354541	0.405429	0.375315	0.755608	0.343478	0.356119	0.603254	0.261624	0.5045	0.386904	0.325473	0.301469	0.363822	0.281022	0.204622	0.51827	0.372086	0.482871	0.472077	0.827562	0.474741	0.30643	0.492724	0.284801	0.414161	0.541432	0.404909	0.568152	0.205042	0.30779	0.439808	0.322773	0.551033	0.692552	0.651671	0.301469	0.61417	0.422324	0.287252	0.221654	0.258465
Rs344	0.404849	0.223144	0.368371	0.312242	0.47854	0.519835	0.336313	0.492305	0.458916	0.423814	0.391627	0.523077	0.239655	0.47854	0.343772	0.216672	0.532086	0.33024	0.495491	0.241003	0.352781	0.244176	0.41049	0.378874	0.441673	0.537381	0.683543	0.450369	0.414274	0.440698	0.351806	0.432823	0.284587	0.50717	0.784339	0.611993	0.40445	0.451985	0.287523	0.246133	0.441673	0.386904	0.387606	0.507528	0.40433	0.366058	0.29608	0.383919	0.286015
Rs345	0.677399	0.317599	0.32839	0.307762	0.524217	0.33455	0.389335	0.404214	0.527355	0.583976	0.416661	0.456619	0.208558	0.524217	0.47275	0.188118	0.491691	0.402997	0.487447	0.276857	0.405168	0.344346	0.423649	0.454255	0.389335	0.524217	0.717022	0.438125	0.489418	0.380758	0.455442	0.47275	0.429531	0.386367	0.638627	0.779397	0.405432	0.349136	0.622232	0.412909	0.405168	0.41373	0.342815	0.342815	0.319044	0.436271	0.433959	0.436271	0.399894
Rs346	0.455141	0.413796	0.351398	0.364218	0.32039	0.607677	0.36105	0.327138	0.534551	0.226598	0.339586	0.517883	0.152273	0.502711	0.422343	0.184255	0.359232	0.297206	0.385054	0.336357	0.352785	0.289744	0.266531	0.402498	0.36105	0.561552	0.336264	0.312259	0.336357	0.345979	0.35031	0.369699	0.489657	0.504378	0.36918	0.702322	0.301519	0.344381	0.303995	0.287044	0.352785	0.557058	0.584193	0.265739	0.342052	0.332528	0.329484	0.281234	0.176215
Rs347	0.437831	0.341003	0.358016	0.342884	0.429566	0.499627	0.315802	0.38606	0.458318	0.249769	0.263927	0.392613	0.211655	0.466002	0.521703	0.182322	0.449771	0.366184	0.474132	0.421163	0.282562	0.222818	0.269316	0.410432	0.375499	0.516578	0.365918	0.367095	0.291109	0.356675	0.419665	0.323877	0.602284	0.487545	0.299513	0.454551	0.382165	0.323877	0.358548	0.341003	0.449333	0.585036	0.570694	0.291109	0.320908	0.311006	0.335639	0.311006	0.198251
Rs348	0.417828	0.375067	0.366184	0.304883	0.382165	0.392613	0.373761	0.311991	0.437482	0.31257	0.336472	0.430766	0.196669	0.559095	0.470928	0.171351	0.466722	0.405006	0.345916	0.295799	0.392613	0.295905	0.304883	0.535611	0.295799	0.496575	0.398559	0.40116	0.347093	0.253641	0.475739	0.238462	0.453069	0.43496	0.437734	0.404696	0.345916	0.278556	0.542144	0.403238	0.479624	0.489559	0.458318	0.178016	0.274237	0.23836	0.287465	0.385462	0.318403
Rs349	0.348601	0.440786	0.322819	0.307468	0.503119	0.324206	0.383764	0.180776	0.390429	0.421163	0.284338	0.429331	0.171351	0.503119	0.508174	0.23836	0.355496	0.347537	0.284154	0.410432	0.457737	0.434436	0.405006	0.482132	0.466002	0.532972	0.434436	0.33247	0.33247	0.247539	0.381993	0.393764	0.249769	0.339586	0.391894	0.535592	0.345916	0.478321	0.375499	0.332573	0.275415	0.419665	0.26015	0.383764	0.262179	0.358016	0.446087	0.475799	0.376478
Rs350	0.4561	0.57634	0.53996	0.404596	0.506676	0.552246	0.439432	0.357769	0.40116	0.459872	0.405414	0.401778	0.312571	0.4561	0.422189	0.344623	0.382303	0.414715	0.493218	0.439432	0.402714	0.493218	0.436345	0.577461	0.411261	0.339622	0.43606	0.331219	0.331219	0.469691	0.437734	0.654028	0.40433	0.579018	0.447836	0.50717	0.456412	0.57634	0.331219	0.288658	0.439432	0.479624	0.46842	0.529044	0.338405	0.338405	0.524316	0.520727	0.291004
Rs351	0.512829	0.56316	0.485508	0.363582	0.534551	0.638548	0.411876	0.452928	0.498273	0.333586	0.395171	0.323877	0.264587	0.557058	0.333586	0.243924	0.459872	0.405465	0.512829	0.459043	0.376804	0.401603	0.466708	0.534551	0.430872	0.439275	0.573453	0.350829	0.300819	0.39273	0.537448	0.629852	0.545301	0.564338	0.496434	0.414766	0.419665	0.59595	0.368257	0.299418	0.422324	0.520497	0.526287	0.517883	0.415174	0.386187	0.414715	0.435126	0.320715
Rs352	0.445795	0.61417	0.545651	0.326701	0.582977	0.631121	0.429665	0.451324	0.466002	0.335035	0.414797	0.325511	0.269316	0.614726	0.386329	0.274437	0.457737	0.46426	0.45367	0.485235	0.4214	0.45367	0.455011	0.590977	0.485235	0.437795	0.56808	0.327011	0.279383	0.393416	0.595493	0.589927	0.510164	0.559207	0.522353	0.377895	0.418562	0.589927	0.4214	0.301795	0.47697	0.457737	0.514222	0.514222	0.386773	0.323182	0.404696	0.46426	0.340141
Rs353	0.402498	0.335834	0.378066	0.364218	0.531699	0.458145	0.46641	0.46067	0.597072	0.272061	0.339586	0.403473	0.226381	0.656862	0.477913	0.160724	0.557058	0.377249	0.490415	0.36105	0.352785	0.245292	0.403732	0.455141	0.439011	0.47454	0.608198	0.46641	0.243266	0.393416	0.512829	0.477913	0.550282	0.513902	0.47454	0.532423	0.401603	0.422343	0.430746	0.287044	0.303995	0.526287	0.615942	0.386367	0.42429	0.359196	0.385054	0.359196	0.222735
Rs354	0.389993	0.348647	0.366985	0.384578	0.464231	0.506676	0.347887	0.366619	0.525302	0.305901	0.328504	0.429331	0.161042	0.585591	0.281208	0.202733	0.427425	0.29347	0.397867	0.227259	0.289612	0.297783	0.365251	0.389993	0.322569	0.43606	0.451934	0.297876	0.297876	0.299418	0.361582	0.46842	0.48103	0.573106	0.585591	0.493942	0.361582	0.439432	0.392266	0.272661	0.339622	0.399254	0.427929	0.373862	0.33024	0.268072	0.291004	0.405273	0.233045
Rs355	0.437831	0.315027	0.277973	0.353873	0.324206	0.412615	0.34112	0.38606	0.439432	0.307255	0.328304	0.412088	0.216672	0.457737	0.521703	0.143841	0.547349	0.328304	0.365918	0.449333	0.307255	0.26828	0.296715	0.33247	0.393764	0.516578	0.418562	0.291109	0.367095	0.324423	0.537448	0.358548	0.331993	0.283946	0.375499	0.517072	0.418562	0.349852	0.332573	0.289709	0.358548	0.489725	0.478321	0.315802	0.218254	0.311006	0.364626	0.294239	0.184255
Rs356	0.595661	0.420784	0.336264	0.449167	0.271808	0.489028	0.57953	0.60446	0.563656	0.404638	0.451934	0.806499	0.394369	0.55949	0.750914	0.314304	0.584379	0.493365	0.421213	0.421306	0.437734	0.374693	0.277372	0.595661	0.471317	0.810804	0.521297	0.638371	0.57953	0.298486	0.600774	0.268063	0.733671	0.592323	0.55949	0.586601	0.389465	0.22639	0.725416	0.708466	0.868517	0.778535	0.767583	0.243058	0.509239	0.417477	0.31178	0.366184	0.381793
[truncated: 307 more columns]
