# Supplementary material for: Construction of SNP fingerprints and genetic diversity analysis of radish (Raphanus sativus L.)
Source: Front Plant Sci. 2024 Feb 2;15:1329890. doi: 10.3389/fpls.2024.1329890 (PMC10869463; doi:10.3389/fpls.2024.1329890)
Supplement: Supplementary Table 6 — Genotypic data for constructing fingerprints of 356 radish materials based on 15 core SNP markers. [file Table_6.xlsx]

## Sheet: Sheet1
Supplementary Table 3 Genotypic data for constructing fingerprints of 356 radish materials based on 15 core SNP markers
MarkerID	Rs001	Rs002	Rs003	Rs004	Rs005	Rs006	Rs007	Rs008	Rs009	Rs010	Rs011	Rs012	Rs013	Rs014	Rs015	Rs016	Rs017	Rs018	Rs019	Rs020	Rs021	Rs022	Rs023	Rs024	Rs025	Rs026	Rs027	Rs028	Rs029	Rs030	Rs031	Rs032	Rs033	Rs034	Rs035	Rs036	Rs037	Rs038	Rs039	Rs040	Rs041	Rs042	Rs043	Rs044	Rs045	Rs046	Rs047	Rs048	Rs049
Chr1_21	TT	CC	TC	TT	TT	TT	TT	CC	TT	TT	TT	TT	TC	TT	TT	TT	TT	TC	TT	TT	TT	TT	TT	CC	TT	TT	CC	TC	TT	TT	CC	TC	TC	TT	TT	TC	TT	TT	TC	TT	TT	TT	TT	TT	TC	TC	TT	TT	TC
Chr2_16	CC	CC	CC	CC	CC	CC	CC	TC	CC	TT	TT	CC	TC	CC	TC	CC	TT	CC	TT	TT	CC	CC	TC	CC	CC	CC	TT	CC	CC	CC	TT	CC	CC	CC	CC	CC	CC	CC	TT	CC	CC	CC	TC	CC	CC	TC	TC	TC	TC
Chr2_33	GG	GT	GT	GT	TT	TT	GG	TT	NN	GG	TT	GG	GT	TT	GG	GG	TT	GG	TT	GG	GG	GG	GT	GG	GG	GG	TT	TT	GG	NN	GG	GG	TT	TT	GT	GG	GG	TT	TT	GT	GT	TT	TT	GT	TT	GG	GG	TT	GT
Chr3_02	AA	AA	AA	GA	GG	AA	AA	AA	AA	GA	GA	AA	NN	AA	AA	GA	NN	AA	AA	AA	AA	AA	GG	AA	AA	AA	GG	AA	AA	NN	AA	GA	AA	AA	GG	AA	NN	GG	AA	AA	AA	AA	AA	GG	AA	AA	AA	GA	GA
Chr4_07	CC	CC	GG	CC	GG	CC	CC	CC	CC	CC	CC	CC	CC	GG	CC	CC	GG	GG	GG	CC	GG	CC	CG	GG	CC	CC	CC	CC	CC	GG	CC	CC	CC	CC	CC	CG	GG	CC	CC	CC	CC	CC	CC	CC	CC	CC	CG	CG	CC
Chr4_23	CC	CC	TC	TC	CC	CC	CC	CC	CC	TT	TC	TT	CC	TT	TT	CC	TT	TC	CC	CC	TC	CC	TC	TT	CC	CC	CC	CC	TT	CC	CC	CC	CC	TT	CC	TT	CC	CC	TT	CC	TT	TC	TT	TC	CC	CC	TC	TC	CC
Chr5_12	GA	GA	AA	GA	GA	AA	GA	AA	GG	AA	GA	AA	AA	GG	GG	AA	AA	AA	AA	GG	GA	AA	GA	AA	AA	GG	AA	AA	AA	GA	GG	AA	GG	AA	AA	GA	AA	AA	GG	GG	AA	GG	GA	AA	AA	GA	GA	AA	GA
Chr5_24	TT	CT	CT	CT	CC	TT	TT	CT	CC	CC	CT	CC	CT	CC	CC	CC	CC	CC	TT	CT	CC	CC	CC	CC	CC	CC	TT	CC	CC	NN	TT	TT	TT	TT	TT	CT	TT	CC	CT	TT	TT	CC	TT	CC	CC	CC	CC	CT	CC
Chr5_34	TT	CC	CT	CT	TT	CC	CC	CC	CC	TT	CC	CC	CT	CC	CT	CT	CC	CT	TT	CC	CT	CC	CT	CT	CC	CC	TT	TT	TT	NN	CC	CC	CT	TT	TT	CC	TT	CC	TT	TT	TT	CC	CC	CC	CC	CC	CC	TT	TT
Chr6_19	AA	AA	AA	TT	AA	AA	AA	TT	AA	AA	AA	AT	AT	AT	TT	AA	TT	AT	AA	TT	AA	AA	AA	AA	AT	AA	AA	TT	TT	AA	TT	AA	AA	AA	AA	AA	TT	AA	TT	TT	AT	TT	TT	AA	AA	AA	AA	AA	AA
Chr6_20	TT	AA	AA	AA	AA	TT	TA	TA	AA	AA	AA	AA	AA	AA	AA	AA	TT	AA	AA	AA	AA	AA	AA	AA	AA	TA	AA	TT	AA	AA	TT	TT	TT	TA	AA	AA	AA	TT	AA	TT	TA	TT	AA	AA	TT	TT	TA	TA	TA
Chr7_12	GG	CC	CC	GC	CC	CC	CC	GG	GC	GG	GC	CC	GC	CC	CC	CC	CC	CC	GG	GC	CC	CC	GC	CC	CC	CC	GG	GG	GC	NN	CC	GG	GC	GC	GC	GG	CC	GC	CC	CC	CC	GG	CC	GG	GG	GG	GC	CC	CC
Chr8_10	AA	GG	AA	GG	GG	GG	AA	AA	GG	AA	AA	AG	AG	GG	AG	AG	AA	AA	AA	GG	AA	GG	AG	AA	GG	GG	AA	AA	AG	AA	AA	GG	AA	AG	GG	AA	GG	GG	AA	AA	AA	AA	AA	GG	AA	AA	AG	GG	AG
Chr8_23	GG	TT	TT	GG	TT	GG	TG	TT	GG	TT	TT	GG	TG	TT	TT	TG	GG	TT	GG	TT	TT	TT	TG	TT	TT	GG	TT	TG	GG	TG	TT	TG	GG	TG	TT	TG	GG	TG	TT	GG	TT	GG	GG	TT	TG	GG	TG	TG	TG
Chr9_24	CC	CC	CC	TC	CC	CC	CC	TT	CC	TC	TC	TT	TC	CC	CC	NN	CC	CC	CC	CC	CC	CC	CC	CC	CC	TT	CC	CC	TT	TC	CC	CC	CC	CC	TT	CC	CC	CC	CC	TC	TT	TT	CC	TT	TC	TC	CC	CC	TC
[truncated: 307 more columns]
