# Supplementary material for: Construction of SNP fingerprints and genetic diversity analysis of radish (Raphanus sativus L.)
Source: Front Plant Sci. 2024 Feb 2;15:1329890. doi: 10.3389/fpls.2024.1329890 (PMC10869463; doi:10.3389/fpls.2024.1329890)
Supplement: Supplementary Table 7 — 71 core germplasm genotypes of radish. [file Table_7.xlsx]

## Sheet: Sheet1
Supplementary Table 7 71 core germplasm genotypes of radish
ID#	Chromosome	Allele X/Y	Chr1_21	Chr1_45	Chr2_16	Chr2_26	Chr2_27	Chr2_33	Chr3_1	Chr3_2	Chr3_17	Chr4_3	Chr4_7	Chr4_23	Chr4_33	Chr5_12	Chr5_22	Chr5_24	Chr5_34	Chr5_36	Chr6_6	Chr6_15	Chr6_19	Chr6_20	Chr7_2	Chr7_12	Chr7_23	Chr8_10	Chr8_23	Chr9_1	Chr9_2	Chr9_14	Chr9_22	Chr9_24
Rs001	Chr1	T/C	T/T	T/T	C/C	G/G	G/G	G/G	A/A	A/A	G/G	A/A	C/C	C/C	G/G	G/A	C/C	T/T	T/T	G/G	G/G	A/A	A/A	T/T	C/C	G/G	G/G	A/A	G/G	G/G	A/A	T/T	T/T	C/C
Rs012	Chr1	T/A	T/T	T/A	C/C	A/A	G/G	G/G	G/G	A/A	A/A	A/A	C/C	T/T	G/G	A/A	T/T	C/C	C/C	A/A	?/?	G/G	A/T	A/A	C/C	C/C	G/G	A/G	G/G	G/G	G/G	T/T	C/C	T/T
Rs014	Chr2	C/T	T/T	T/T	C/C	A/A	G/G	T/T	A/G	A/A	G/G	A/A	G/G	T/T	T/T	G/G	C/C	C/C	C/C	G/G	G/G	G/G	A/T	A/A	T/T	C/C	G/G	G/G	T/T	G/G	A/A	T/T	C/C	C/C
Rs015	Chr2	G/A	T/T	T/T	T/C	A/G	A/A	G/G	G/G	A/A	A/A	T/T	C/C	T/T	T/T	G/G	T/T	C/C	C/T	A/G	G/G	G/G	T/T	A/A	T/T	C/C	A/A	A/G	T/T	G/G	G/G	T/T	T/T	C/C
Rs026	Chr2	A/G	T/T	T/T	C/C	A/A	G/G	G/G	A/A	A/A	G/G	T/T	C/C	C/C	G/G	G/G	T/T	C/C	C/C	G/G	A/A	G/G	A/A	T/A	T/C	C/C	G/G	G/G	G/G	G/G	G/G	G/G	C/C	T/T
Rs027	Chr2	G/T	C/C	T/T	T/T	G/G	A/A	T/T	A/A	G/G	G/G	A/A	C/C	C/C	G/G	A/A	T/T	T/T	T/T	G/G	A/A	G/G	A/A	A/A	C/C	G/G	G/G	A/A	T/T	G/G	A/A	T/T	C/C	C/C
Rs033	Chr3	A/G	T/C	T/T	C/C	G/G	G/G	T/T	G/G	A/A	G/G	A/A	C/C	C/C	T/T	G/G	T/C	T/T	C/T	A/G	G/G	G/G	A/A	T/T	T/C	G/C	G/G	A/A	G/G	G/A	A/A	T/T	T/T	C/C
Rs034	Chr3	G/A	T/T	T/A	C/C	A/A	A/A	T/T	G/G	A/A	A/G	T/A	C/C	T/T	T/T	A/A	T/C	T/T	T/T	G/G	G/G	G/G	A/A	T/A	C/C	G/C	G/G	A/G	T/G	A/A	G/G	T/T	?/?	C/C
Rs035	Chr3	G/A	T/T	T/T	C/C	A/A	G/G	G/T	A/A	G/G	G/G	A/A	C/C	C/C	G/G	A/A	C/C	T/T	T/T	G/G	G/G	G/G	A/A	A/A	C/C	G/C	G/G	G/G	T/T	G/G	A/A	G/G	C/C	T/T
Rs036	Chr4	T/A	T/C	A/A	C/C	A/A	G/G	G/G	G/G	A/A	A/A	T/A	C/G	T/T	G/T	G/A	T/T	C/T	C/C	G/G	A/A	A/A	A/A	A/A	T/T	G/G	G/G	A/A	T/G	G/A	A/G	G/G	C/C	C/C
Rs039	Chr4	C/G	T/C	T/T	T/T	G/G	G/G	T/T	A/G	A/A	G/G	A/A	C/C	T/T	T/T	G/G	T/C	C/T	T/T	A/A	G/G	A/A	T/T	A/A	C/C	C/C	G/G	A/A	T/T	G/G	A/A	T/T	C/C	C/C
Rs041	Chr4	C/T	T/T	T/T	C/C	G/G	G/G	G/T	A/G	A/A	G/G	T/T	C/C	T/T	G/G	A/A	T/T	T/T	T/T	G/G	G/G	G/G	A/T	T/A	C/C	C/C	G/G	A/A	T/T	G/G	G/G	T/T	T/T	T/T
Rs042	Chr4	T/G	T/T	T/T	C/C	G/G	A/A	T/T	G/G	A/A	G/G	T/T	C/C	T/C	G/G	G/G	?/?	C/C	C/C	G/G	G/G	A/A	T/T	T/T	C/C	G/G	G/G	A/A	G/G	G/A	G/G	G/G	C/C	T/T
Rs043	Chr5	A/G	T/T	A/A	T/C	G/G	A/A	T/T	G/G	A/A	G/G	A/A	C/C	T/T	T/T	G/A	C/C	T/T	C/C	G/G	A/A	G/G	T/T	A/A	C/C	C/C	G/G	A/A	G/G	G/G	G/G	T/T	T/C	C/C
Rs055	Chr5	T/C	T/T	T/T	T/T	G/G	A/A	T/T	A/A	G/G	G/G	T/T	C/C	C/C	T/T	A/A	T/T	C/C	T/T	A/A	G/G	G/A	A/A	T/T	C/C	G/G	G/G	G/G	T/T	G/A	A/A	T/T	T/C	C/C
Rs064	Chr5	T/C	C/C	T/T	T/T	G/G	A/A	T/T	G/G	A/A	G/G	T/A	C/C	T/C	G/T	G/G	T/T	C/C	T/T	A/A	A/A	G/G	T/T	A/A	C/C	C/C	A/A	A/G	G/G	G/G	A/A	G/T	C/C	C/C
Rs068	Chr5	C/T	C/C	A/A	C/C	G/G	?/?	G/G	A/G	A/A	G/G	T/T	C/C	C/C	G/T	A/A	?/?	C/C	C/C	A/G	G/A	G/G	T/T	T/T	T/T	C/C	G/G	A/A	T/T	G/A	G/G	T/T	T/T	T/T
Rs073	Chr5	G/A	T/T	T/T	T/T	G/G	A/A	G/G	A/A	G/G	A/G	A/A	?/?	T/T	T/T	G/G	T/T	C/C	C/C	G/G	G/A	G/G	A/T	T/A	C/C	C/C	A/A	A/A	T/T	G/G	A/A	G/G	C/C	C/C
Rs075	Chr6	G/A	C/C	T/T	C/C	G/G	G/G	G/G	G/G	G/G	G/G	A/A	C/C	C/C	T/T	G/A	T/T	C/C	C/C	G/G	A/A	G/G	A/A	T/T	T/T	G/G	G/G	A/A	G/G	G/G	A/A	G/G	T/C	C/C
Rs076	Chr6	A/G	T/T	T/T	T/T	A/G	G/G	G/T	G/G	A/A	G/G	T/A	C/G	C/C	G/T	A/A	?/?	C/T	T/T	G/G	A/A	G/A	A/A	A/A	C/C	C/C	G/G	A/A	G/G	G/G	G/G	T/T	T/T	C/C
Rs079	Chr6	A/T	T/C	T/T	C/C	A/A	A/A	T/T	A/A	A/A	A/A	?/?	C/C	C/C	G/G	A/A	T/C	?/?	C/C	G/G	A/A	G/G	T/T	A/A	C/C	C/C	A/A	A/A	G/G	G/A	A/A	G/T	C/C	T/T
Rs082	Chr6	T/A	T/T	T/T	C/C	G/G	A/A	T/T	A/A	G/G	A/A	A/A	C/C	T/C	G/G	G/G	T/C	C/T	C/C	G/G	G/A	G/G	T/T	T/A	C/C	C/C	G/G	A/A	G/G	G/G	A/A	G/G	T/T	C/C
Rs084	Chr7	C/T	C/C	T/T	T/T	G/G	A/A	G/G	A/A	G/G	A/A	A/A	C/C	C/C	T/T	A/A	T/T	C/C	C/T	G/G	G/G	A/A	A/A	T/T	T/T	C/C	A/G	G/G	G/G	A/A	A/A	T/T	C/C	C/C
Rs086	Chr7	G/C	C/C	T/T	T/T	A/A	A/A	T/T	G/G	A/A	G/G	T/T	G/G	C/C	G/G	A/A	T/T	C/C	C/T	G/G	G/A	G/G	T/T	A/A	C/C	C/C	G/G	A/A	T/T	G/A	A/A	T/T	T/T	C/C
Rs092	Chr7	G/A	T/T	A/A	T/C	G/G	A/G	G/T	G/G	A/A	A/A	T/A	C/C	T/C	G/G	A/A	C/C	C/C	C/C	G/G	G/A	A/A	T/T	T/A	C/C	G/C	A/G	A/A	T/T	G/G	A/G	G/G	T/C	T/T
Rs115	Chr8	G/A	T/T	A/A	C/C	G/G	A/A	G/G	A/A	G/G	G/G	A/A	C/G	C/C	T/T	A/A	T/T	C/C	C/C	G/G	G/G	G/A	A/A	A/A	C/C	G/G	A/A	G/G	G/G	A/A	A/A	G/T	C/C	C/C
Rs117	Chr8	G/T	T/T	A/A	T/C	G/G	A/A	G/G	G/G	A/A	A/G	T/T	C/C	T/T	G/G	A/A	T/T	C/C	T/T	G/G	G/G	A/A	T/T	T/T	T/T	G/G	A/A	G/G	T/T	G/G	A/A	T/T	T/T	C/C
Rs118	Chr9	G/A	T/C	T/T	C/C	G/G	A/A	G/T	G/G	A/A	G/G	T/A	C/C	T/C	G/G	G/G	T/C	C/T	C/T	A/A	G/G	G/A	T/T	T/A	C/C	C/C	G/G	A/G	G/G	G/G	G/G	T/T	?/?	T/T
Rs125	Chr9	A/G	C/C	T/A	T/T	A/A	G/G	?/?	A/A	G/A	A/G	T/T	C/C	T/C	G/G	G/G	T/C	C/T	C/C	A/G	G/A	A/A	T/T	T/A	C/C	C/C	G/G	A/G	T/T	G/G	G/G	G/G	C/C	C/C
Rs138	Chr9	G/T	T/T	T/T	T/T	A/G	G/G	G/G	G/G	A/A	G/G	A/A	G/G	T/C	G/T	G/G	T/C	C/T	T/T	A/G	A/A	A/A	T/T	T/A	C/C	C/C	G/G	A/G	T/G	G/G	A/A	G/T	T/C	T/C
Rs141	Chr9	C/T	T/C	T/T	C/C	A/G	A/G	G/T	A/G	G/A	A/G	A/A	C/C	T/C	G/G	?/?	T/C	C/T	T/T	A/A	G/A	G/G	A/A	T/A	C/C	G/C	G/G	A/G	T/T	G/A	G/G	T/T	C/C	T/C
Rs147	Chr9	C/T	T/T	A/A	C/C	A/G	A/G	T/T	A/G	A/A	A/G	T/T	C/C	C/C	T/T	A/A	C/C	C/T	C/C	A/A	G/G	G/G	T/T	T/A	C/C	G/C	A/G	A/A	G/G	G/G	A/A	G/T	T/T	C/C
Rs159			C/C	T/T	T/T	A/G	G/G	G/T	A/G	A/A	G/G	T/A	C/C	C/C	T/T	A/A	C/C	C/T	C/T	A/G	G/A	G/A	T/T	T/T	C/C	C/C	G/G	A/A	T/T	G/A	G/G	T/T	T/C	C/C
Rs168			T/T	A/A	T/C	A/G	A/G	T/T	A/A	G/G	G/G	A/A	G/G	T/C	G/T	G/A	T/T	C/T	T/T	G/G	G/G	G/G	A/T	A/A	C/C	G/C	G/G	G/G	G/G	G/A	A/A	G/T	T/C	C/C
Rs180			T/C	A/A	T/C	A/G	A/A	G/T	A/A	G/G	G/G	T/A	G/G	C/C	G/G	G/G	T/T	C/T	T/T	G/G	G/G	G/G	A/A	A/A	C/C	G/C	G/G	A/G	G/G	G/A	A/G	G/G	C/C	C/C
Rs189			T/C	T/T	T/C	?/?	A/G	?/?	?/?	?/?	A/G	T/A	C/C	C/C	G/T	G/A	?/?	C/C	?/?	A/G	A/A	G/A	?/?	T/A	C/C	?/?	A/A	?/?	T/T	G/A	A/G	G/T	T/C	C/C
Rs210			C/C	A/A	T/C	G/G	A/G	G/T	A/G	G/A	A/G	A/A	C/C	C/C	T/T	G/A	T/T	?/?	T/T	A/G	G/A	G/A	?/?	T/A	T/T	C/C	G/G	A/A	T/T	G/G	A/A	?/?	T/C	C/C
Rs224			?/?	?/?	?/?	?/?	G/G	G/G	A/A	?/?	?/?	A/A	?/?	?/?	?/?	G/A	?/?	?/?	C/C	G/G	?/?	G/G	?/?	?/?	?/?	?/?	A/A	?/?	?/?	G/G	?/?	?/?	C/C	?/?
Rs229			T/C	A/A	T/C	G/G	G/G	T/T	A/G	?/?	G/G	T/T	C/G	T/T	G/G	G/A	T/C	C/C	T/T	G/G	G/G	G/A	A/T	T/A	C/C	C/C	G/G	A/A	T/T	G/A	A/G	T/T	T/T	T/C
Rs230			C/C	T/T	T/C	A/A	A/A	T/T	G/G	A/A	G/G	T/T	G/G	C/C	G/G	G/A	C/C	C/C	T/T	A/G	A/A	G/G	A/A	A/A	C/C	G/G	G/G	A/A	T/T	G/A	G/G	T/T	T/T	C/C
Rs233			T/C	A/A	C/C	A/G	A/G	G/T	G/G	A/A	A/G	T/T	C/C	C/C	T/T	G/A	T/T	C/T	C/T	G/G	G/G	A/A	T/T	T/A	T/C	G/G	G/G	A/G	G/G	G/A	G/G	G/T	T/T	C/C
Rs234			T/T	A/A	T/T	G/G	A/A	G/G	G/G	A/A	A/G	T/T	C/C	C/C	T/T	G/A	T/T	C/C	T/T	G/G	G/G	G/G	T/T	A/A	T/T	G/G	A/A	G/G	T/T	G/A	A/A	T/T	T/T	C/C
Rs236			T/T	T/T	C/C	A/G	G/G	G/G	A/G	A/A	G/G	T/T	C/C	C/C	G/G	G/G	C/C	C/C	T/T	A/G	G/A	G/G	T/T	T/T	C/C	G/C	A/A	A/A	T/T	G/G	A/G	G/G	C/C	T/C
Rs243			C/C	?/?	C/C	G/G	A/A	T/T	A/A	A/A	G/G	T/T	C/G	C/C	G/T	G/G	T/C	C/T	C/T	G/G	A/A	G/A	A/T	T/A	T/C	G/C	G/G	A/A	T/G	G/G	G/G	G/G	C/C	T/C
Rs245			T/T	A/A	C/C	A/G	A/A	T/T	A/A	A/A	G/G	T/T	C/C	T/T	G/G	G/G	T/T	C/C	C/T	G/G	A/A	G/G	T/T	T/T	T/C	C/C	A/G	A/G	G/G	G/A	G/G	T/T	T/C	T/C
Rs253			T/C	T/T	C/C	A/A	A/A	G/G	G/G	A/A	A/G	A/A	C/C	C/C	T/T	A/A	C/C	T/T	C/C	G/G	G/G	G/G	T/T	T/T	C/C	C/C	A/A	A/A	G/G	?/?	A/G	G/T	C/C	C/C
Rs267			T/C	T/T	C/C	A/A	A/G	G/G	A/A	G/G	A/G	T/T	G/G	C/C	G/T	G/A	C/C	?/?	T/T	G/G	A/A	G/G	A/T	T/A	C/C	G/G	G/G	A/G	T/T	G/G	G/G	G/T	C/C	C/C
Rs273			T/T	T/T	T/T	G/G	A/G	?/?	G/G	A/A	G/G	T/T	G/G	C/C	T/T	A/A	T/T	C/C	C/C	A/G	?/?	A/A	T/T	T/T	C/C	C/C	A/A	G/G	T/T	G/G	A/A	G/G	C/C	T/T
Rs274			T/C	T/T	T/T	A/A	A/A	G/G	A/A	G/G	A/G	A/A	C/C	C/C	G/G	A/A	T/T	C/C	T/T	A/A	G/G	G/G	A/A	A/A	C/C	C/C	A/A	A/A	T/T	G/G	A/A	T/T	T/T	T/T
Rs278			C/C	A/A	T/T	A/G	A/G	G/T	A/A	A/A	A/G	A/A	C/C	T/C	T/T	A/A	T/T	C/C	T/T	G/G	G/G	G/G	A/A	T/A	T/T	G/G	G/G	A/G	T/T	G/G	A/A	T/T	C/C	C/C
Rs279			T/T	T/T	C/C	G/G	G/G	G/G	A/A	?/?	G/G	A/A	C/C	C/C	T/T	A/A	C/C	T/T	C/C	G/G	G/G	A/A	A/A	A/A	T/T	G/C	A/A	G/G	T/T	G/G	G/G	T/T	C/C	T/T
Rs280			T/T	T/T	C/C	G/G	A/A	T/T	A/A	G/G	G/G	T/T	G/G	T/C	T/T	A/A	T/T	T/T	C/C	G/G	A/A	A/A	A/A	A/A	C/C	G/G	G/G	G/G	G/G	G/G	A/A	T/T	C/C	C/C
Rs281			C/C	T/A	C/C	G/G	A/A	?/?	A/G	A/A	A/G	T/A	G/G	C/C	T/T	G/A	T/T	C/C	?/?	G/G	G/G	A/A	A/A	T/A	T/T	C/C	A/A	G/G	T/T	G/G	A/A	?/?	C/C	T/T
Rs282			T/C	A/A	T/T	A/A	A/A	?/?	A/A	?/?	G/G	A/A	G/G	C/C	G/G	A/A	C/C	C/C	C/C	A/A	G/G	G/G	A/A	A/A	C/C	C/C	G/G	A/A	T/T	?/?	A/A	G/G	C/C	T/T
Rs284			C/C	T/T	C/C	G/G	G/G	G/T	A/A	?/?	A/G	T/T	C/C	C/C	T/T	A/A	C/C	C/C	C/C	G/G	G/G	G/A	A/A	A/A	C/C	G/G	A/A	A/A	G/G	G/G	A/A	G/G	C/C	T/T
Rs285			T/T	A/A	C/C	G/G	A/A	G/G	A/A	G/G	G/G	A/A	C/C	C/C	G/G	A/A	T/T	T/T	C/C	G/G	G/G	G/G	A/A	A/A	C/C	G/G	A/A	G/G	G/G	G/A	A/A	G/G	C/C	C/C
Rs287			T/T	T/T	C/C	G/G	A/A	G/G	A/A	G/G	G/G	A/A	G/G	C/C	G/G	G/A	T/T	C/C	C/C	G/G	G/G	G/G	A/A	A/A	T/T	C/C	G/G	G/G	G/G	A/A	A/A	T/T	C/C	C/C
Rs288			T/T	A/A	C/C	A/A	A/A	T/T	A/A	G/G	G/G	A/A	C/C	C/C	T/T	A/A	C/C	T/T	T/T	G/G	G/G	G/A	A/A	T/T	C/C	C/C	G/G	G/G	G/G	G/G	A/A	T/T	T/T	C/C
Rs296			C/C	T/T	C/C	A/G	G/G	G/T	A/A	G/G	G/G	A/A	C/C	T/T	G/G	G/G	T/T	C/C	C/C	A/G	A/A	G/G	T/T	A/A	C/C	C/C	A/A	A/A	T/G	G/G	A/A	G/G	C/C	C/C
Rs297			?/?	T/T	T/T	G/G	A/A	G/G	A/A	G/G	G/G	A/A	C/C	C/C	T/T	G/G	T/T	T/T	C/C	G/G	G/G	G/G	A/A	T/T	C/C	G/G	G/G	A/A	G/G	G/G	G/G	G/G	C/C	C/C
Rs298			T/T	T/T	T/T	A/A	A/A	?/?	G/G	A/A	A/G	T/T	C/C	C/C	G/G	A/A	T/T	C/C	T/T	G/G	G/A	G/G	T/T	T/T	C/C	G/C	G/G	G/G	G/G	?/?	A/A	T/T	C/C	T/T
Rs299			T/T	T/T	T/T	G/G	A/A	T/T	A/A	A/A	G/G	T/T	G/G	T/T	G/G	G/G	T/T	C/T	C/T	A/G	G/G	G/A	T/T	T/A	C/C	C/C	A/G	G/G	G/G	G/A	A/G	T/T	T/T	C/C
Rs300			C/C	T/T	?/?	A/A	G/G	T/T	A/A	A/A	A/G	A/A	G/G	T/T	T/T	A/A	C/C	T/T	C/C	G/G	G/G	G/G	T/T	T/T	C/C	G/G	A/A	A/A	T/T	G/G	G/G	T/T	T/T	C/C
Rs301			T/T	T/T	?/?	A/A	A/A	G/G	A/A	G/G	G/G	A/A	C/C	?/?	T/T	G/G	C/C	C/C	C/C	G/G	G/G	G/G	A/A	T/T	T/T	C/C	G/G	A/A	T/T	G/G	A/A	T/T	C/C	T/T
Rs303			C/C	?/?	C/C	G/G	G/G	G/G	G/G	A/A	A/G	T/T	G/G	T/C	T/T	G/G	T/T	C/C	C/C	G/G	G/G	A/A	T/T	T/T	T/T	C/C	A/A	G/G	T/T	?/?	A/A	T/T	T/C	T/T
Rs307			T/T	A/A	C/C	G/G	A/A	G/G	A/A	G/G	G/G	A/A	G/G	C/C	T/T	A/A	T/T	T/T	C/C	G/G	G/G	A/A	A/A	A/A	C/C	C/C	A/A	G/G	G/G	G/A	A/A	T/T	C/C	C/C
Rs309			C/C	?/?	C/C	G/G	G/G	G/G	G/G	A/A	A/G	T/T	G/G	T/C	T/T	A/A	T/T	C/C	C/C	G/G	G/G	A/A	A/A	T/T	C/C	C/C	G/G	G/G	T/T	G/G	A/A	T/T	T/C	T/T
Rs310			C/C	?/?	C/C	G/G	G/G	G/G	G/G	A/A	G/G	T/T	G/G	T/C	T/T	G/A	T/T	C/C	C/C	G/G	G/G	A/A	T/T	T/T	C/C	C/C	A/A	G/G	T/T	G/G	A/A	G/T	T/C	T/T
Rs340			C/C	A/A	C/C	G/G	A/A	T/T	A/A	A/A	G/G	T/T	C/C	C/C	T/T	G/G	C/C	C/C	T/T	G/G	A/A	A/A	T/T	A/A	C/C	G/G	G/G	A/A	G/G	G/A	G/G	T/T	T/T	T/T
Rs341			T/T	A/A	C/C	A/A	G/G	?/?	A/A	G/G	G/G	T/T	C/C	C/C	T/T	G/G	T/T	C/C	C/C	A/A	G/G	G/G	T/T	A/A	C/C	C/C	A/A	A/A	G/G	G/A	A/A	G/G	C/C	C/C
Rs356			T/T	A/A	C/C	G/G	A/A	G/G	A/A	G/G	G/G	A/A	G/G	C/C	T/T	A/A	T/T	C/C	C/C	G/G	G/G	A/A	A/A	A/A	C/C	G/G	A/A	G/G	T/T	A/A	A/A	T/T	C/C	C/C
